# Supplementary material for: Properties of LINE-1 proteins and repeat element expression in the context of amyotrophic lateral sclerosis
Source: PubMed Central journal article supplement (PMC6295051; doi:10.1186/s13100-018-0138-z), 2018-12-15
Supplement: 13100_2018_138_MOESM1_ESM.pdf [file 13100_2018_138_MOESM1_ESM.pdf]

## Properties of LINE-1 proteins and repeat element expression in the context of amyotrophic lateral sclerosis

Gavin C. Pereira<sup>1</sup>, Laura Sanchez<sup>2</sup>, Paul M. Schaughency<sup>3</sup>, Alejandro Rubio-Roldán<sup>2</sup>, Jungbin A. Choi<sup>1</sup>, Evarist Planet<sup>4</sup>, Ranjan Batra<sup>5</sup>, Priscilla Turelli<sup>4</sup>, Didier Trono<sup>4</sup>, Lyle W. Ostrow<sup>6</sup>, John Ravits<sup>5</sup>, Haig H. Kazazian<sup>1</sup>, Sarah J. Wheelan<sup>3</sup>, Sara R. Heras<sup>2,7</sup>, Jens Mayer<sup>8</sup>, Jose Luis García-Pérez<sup>2,9</sup>, John L. Goodier<sup>1\*</sup>.

1. McKusick-Nathans Institute of Genetic Medicine, Johns Hopkins University School of Medicine, Baltimore, Maryland, USA.
2. GENYO. Centre for Genomics and Oncological Research: Pfizer, University of Granada, Andalusian Regional Government, Granada, Spain.
3. Oncology Center-Cancer Biology, Johns Hopkins University School of Medicine, Baltimore, Maryland, USA.
4. School of Life Sciences, École Polytechnique Fédérale de Lausanne (EPFL), Lausanne CH-1015, Switzerland.
5. Department of Neurosciences, School of Medicine, University of California at San Diego, USA.
6. Neuromuscular Division, Johns Hopkins University School of Medicine, Baltimore, Maryland, USA.
7. Department of Biochemistry and Molecular Biology II, Faculty of Pharmacy, University of Granada, Spain.
8. Department of Human Genetics, Medical Faculty, University of Saarland, Homburg/Saar, Germany.
9. MRC Human Genetics Unit, Institute of Genetics and Molecular Medicine (IGMM), University of Edinburgh, Western General Hospital, Edinburgh, United Kingdom.

\* Corresponding author: jgoodier@jhmi.edu

### Additional file 1: Supplemental Figures

**Figure S1.** Patterns of L1 ORF1p expression in various cell lines using multiple antibodies for detection.

**Figure S2.** Frequency of polymorphisms and DNA methylation at the L1 ORF1p R159 residue.

**Figure S3.** ORF1p does not contain a CRM1-dependent nuclear export signal.

**Figure S4.** Cell culture toxicity assays.

**Figure S5.** Overexpression or knock-down of TDP-43 protein does not alter L1 expression.

**Figure S6.** Methylation analyses of the CpG island of the 5' UTR promoter of endogenous L1 elements show effects of altered levels of TDP-43.

**Figure S7.** Expression levels of L1 and Alu determined by RT-qPCR.

**Figure S8.** Representative gels showing expression of ORF1p in normal and ALS-associated tissues determined by Western blotting.

**Figure S9.** TE locus-specific analyses of the GSE67196 RNA-Seq dataset.

## SUPPLEMENTAL FIGURES

**Figure S1.** Patterns of L1 ORF1p expression in various cell lines using multiple antibodies for detection. **A)** Western blot analysis of expression in human cell lines using the monoclonal  $\alpha$ -4H1-ORF1 antibody. Left: following antibody probing, the membrane was stained with ponceau S to show transferred protein. **B)** Detection of endogenous ORF1p in cytoplasmic granules of 2102Ep cells with rabbit monoclonal  $\alpha$ -JH73-ORF1 antibody [177]. **C)** In human neuroblastoma SH-SY5Y cells, ORF1p aggregates are predominantly seen in neurite outgrowths not in the cytoplasm proper. **D)** Detection of endogenous ORF1p in the cytoplasm of HEK 293T cells using the rabbit polyclonal  $\alpha$ -AH40.1-ORF1 antibody [68]. **E)** Cytoplasmic granule, nucleolar and perinuclear concentration of endogenous ORF1p in 2102Ep cells detected by  $\alpha$ -AH40.1-ORF1. **F)** Only a small percentage of endogenous ORF1p cytoplasmic granules colocalize with p-bodies detected by  $\alpha$ -p70 S6 kinase antibody, which recognizes HEDLS/EDC4 (marked by arrows, [220]). **G-I)** Some ORF1p cytoplasmic granules colocalize with RFP-tagged LC3 but not with endogenous autophagic proteins ATG12 or ATG16L in untreated 2102Ep cells.

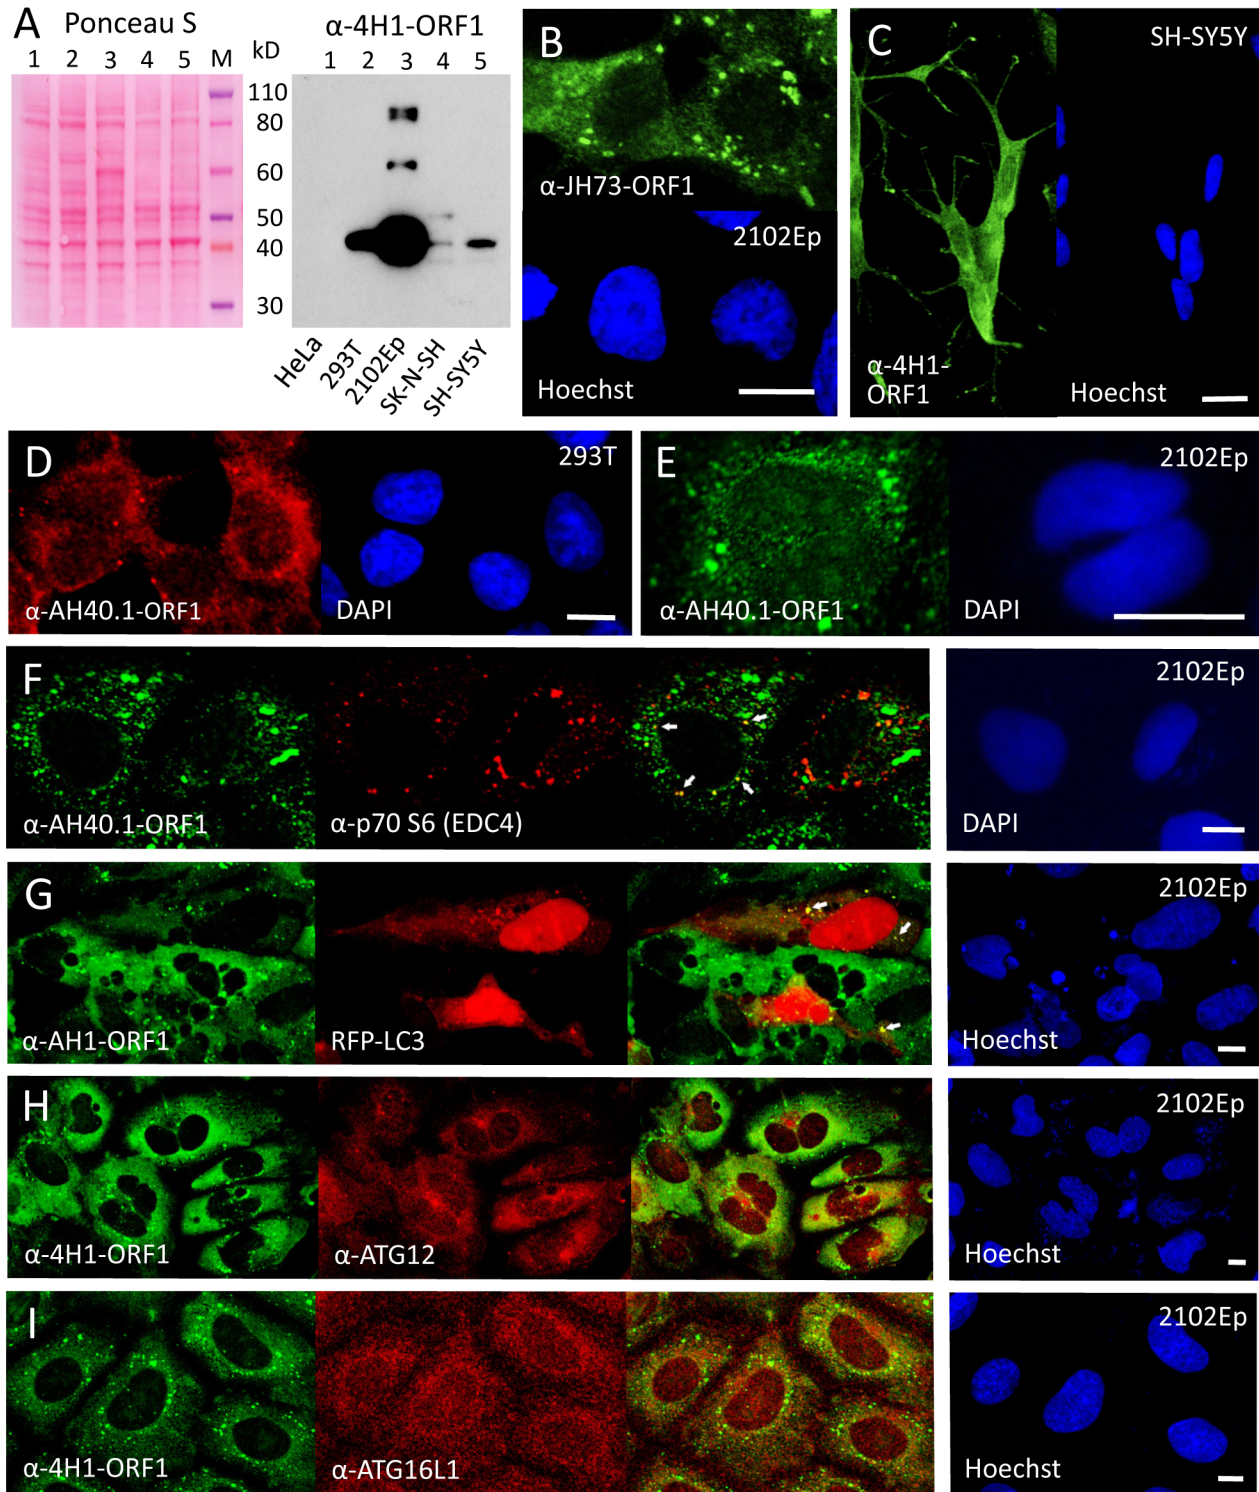

Fig. S1

**Figure S2.** Frequency of polymorphisms and DNA methylation at the L1 ORF1p R159 residue. **A)** Based on L1 elements compiled in L1Base2 [13], we examined the frequency of non-synonymous nucleotide changes within the R159 codon and resulting amino acids. FLI-L1s: L1s with intact ORF1 and ORF2; ORF2-L1s: L1s with intact ORF2 but disrupted ORF1; FLnI-L1s: non-intact L1s >4500 nucleotides in length. For each category, observed total numbers and percentages of codons for arginine (R) and the most frequently occurring codons for histidine (H), cysteine (C) and proline (P) are given. Also shown for the FLnI-L1s dataset is the frequency of a codon for glycine (G) (see the main paper text for details). A minority of L1 sequences (~2.7%) displayed other codons, very likely because of higher sequence divergence within the R159 region resulting in unreliable alignments and thus unreliable prediction of the R159 codon. **B)** Bisulfite conversion methylation analysis by QUantification tool for Methylation Analysis (QUMA; [223]) software of 9 CpGs within a 436-nt stretch of ORF1 shows no preference for conversion of the R159 CpG. Left: percent methylation of CpG residues within this stretch. CpG residues are numbered according to element L1-RP (accession number AF148856.1). Right: the individual methylation status of 26 L1 amplicon sequences. Open circles, closed circles and crosses represent unmethylated, methylated and mutated CpG positions, respectively.

A

|              |       | FLI-L1s    |            | ORF2-L1s  |            | FLnI-L1s    |            |
|--------------|-------|------------|------------|-----------|------------|-------------|------------|
| AA           | Codon | #          | %          | #         | %          | #           | %          |
| Arg / R      | CGT   | 139        | 95.2       | 85        | 88.5       | 3541        | 55.8       |
|              | CGC   |            |            |           |            | 25          | 0.4        |
|              | CGA   |            |            |           |            | 17          | 0.3        |
|              | CGG   |            |            |           |            | 2           | 0.03       |
| His / H      | CAT   | 4          | 2.7        | 7         | 7.3        | 1507        | 23.8       |
|              | CAC   |            |            |           |            | 14          | 0.2        |
| Cys / C      | TGT   | 2          | 1.4        | 4         | 4.2        | 949         | 15.0       |
|              | TGC   |            |            |           |            | 16          | 0.3        |
| Pro / P      | CCT   | 1          | 0.7        |           |            | 62          | 1.0        |
|              | CCG   |            |            |           |            | 1           | 0.02       |
| Gly / G      | GGT   |            |            |           |            | 30          | 0.5        |
| Other        |       |            |            |           |            | 182         | 2.9        |
| <b>TOTAL</b> |       | <b>146</b> | <b>100</b> | <b>96</b> | <b>100</b> | <b>6346</b> | <b>100</b> |

B

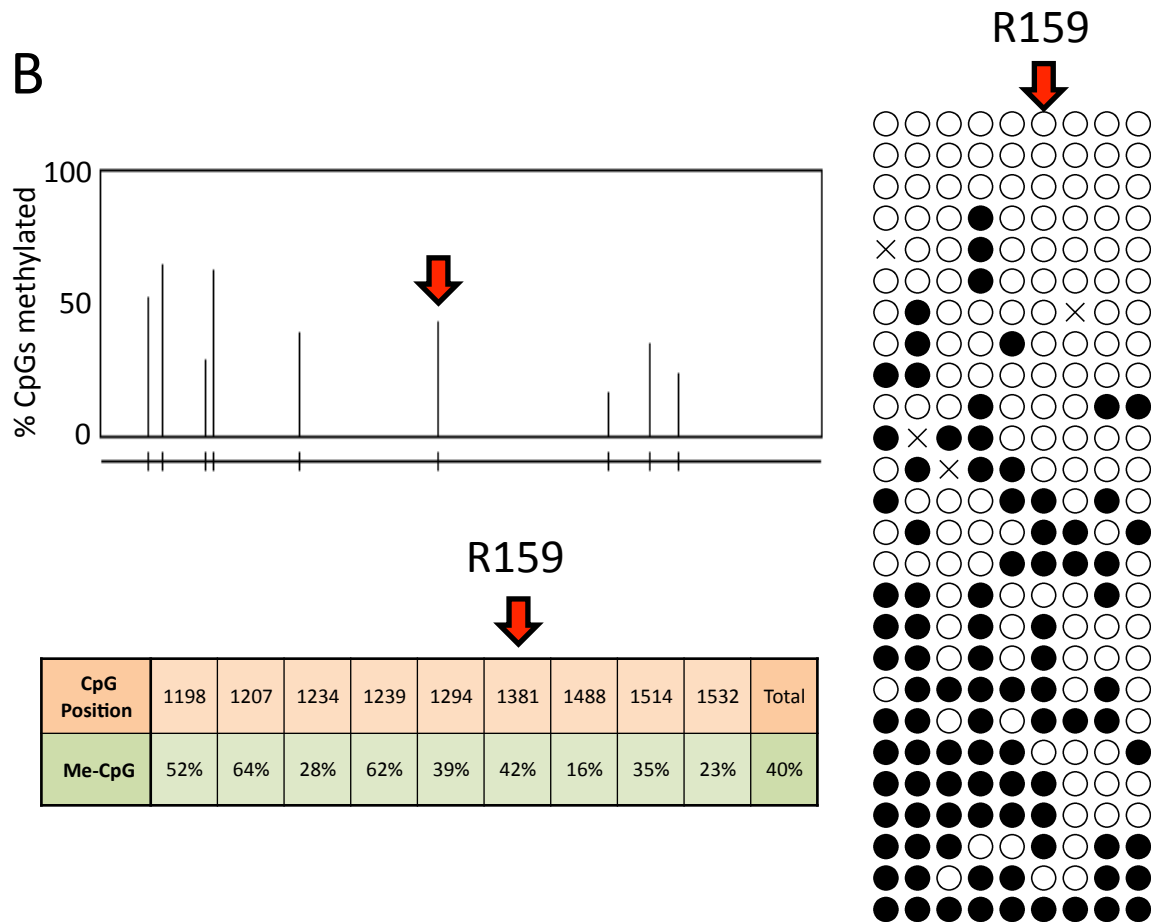

Fig. S2

**Figure S3.** ORF1p does not contain a CRM1-dependent nuclear export signal. **A)** Treatment of 2102Ep cells with 30 ng/ml leptomycin B for 4 hours or overnight does not obviously alter the localization pattern of endogenous ORF1p. Patient sera-derived  $\alpha$ -ANA-N marks nucleoli. **B,C)** However, LMB efficiently inhibits nuclear export of control proteins, endogenous cyclin B1 (B) and exogenously expressed MK2 T205/317E mutant protein (C) [111]. **D)** Fusing the putative ORF1p nuclear export signal LKELLKEAL (aa 313-321) to EGFP does not visibly increase accumulation of EGFP protein in the cytoplasm. **E)** Mutating the putative ORF1p nuclear export signal sequence LKELLKEAL in ORF1-EGFP-L1-RP (ORF1-EGFP-L1-RP-LKEAAAAAL) does not visibly increase accumulation of ORF1p in nuclei. Size bars are 10  $\mu$ m.

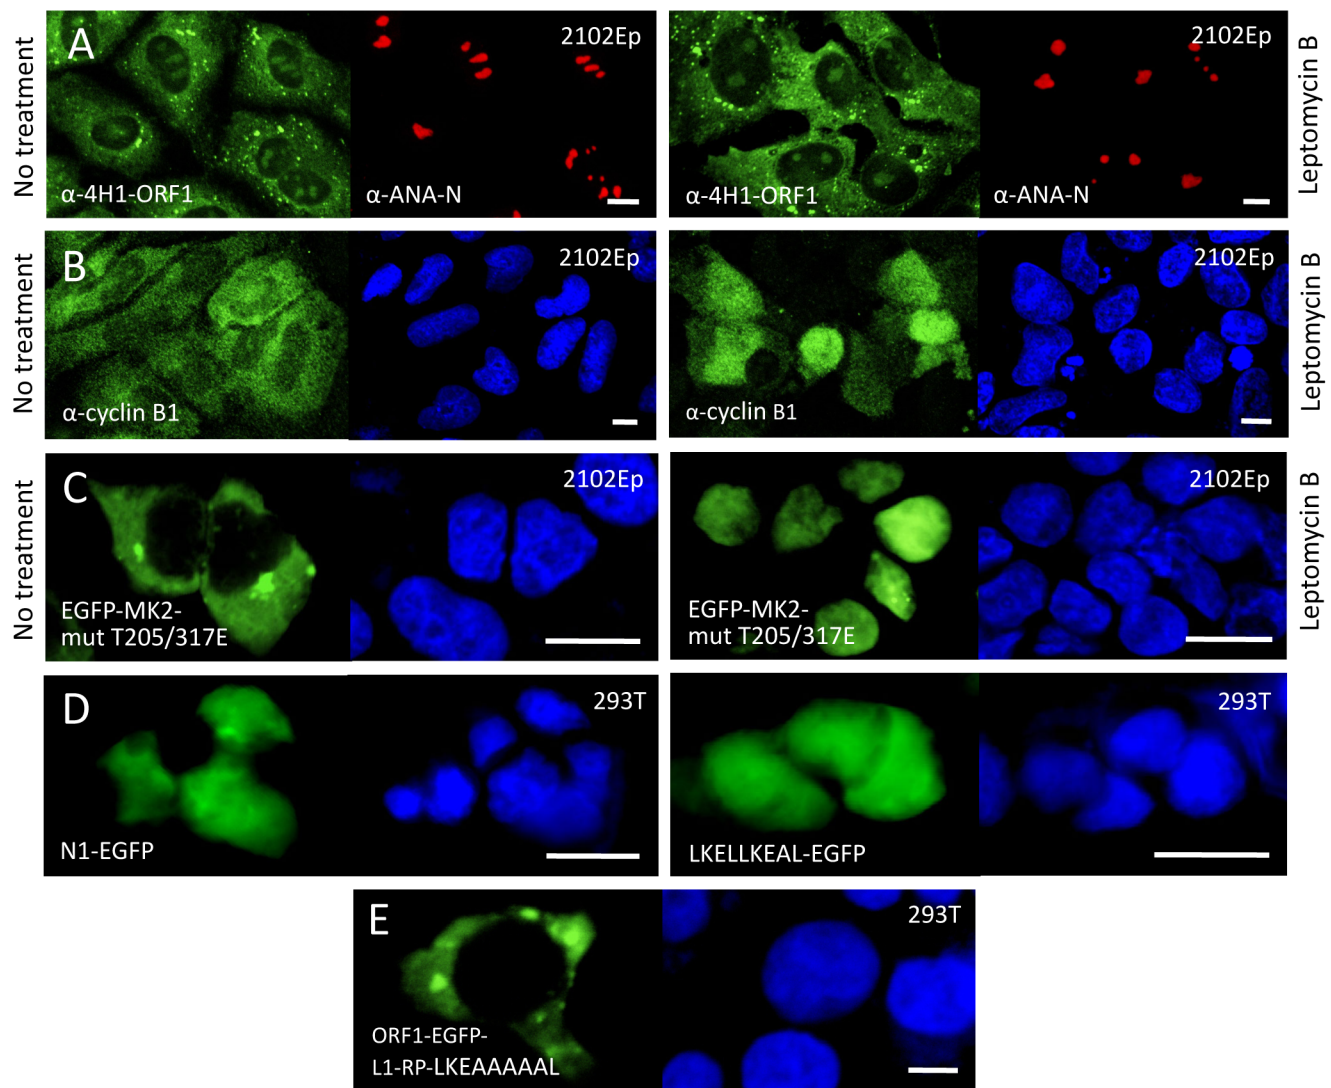

Fig. S3

**Figure S4.** Cell culture toxicity assays. **A)** HEK 293T cells, transfected in five wells with each plasmid tested in the retrotransposition assay of Figure 5B, were stained on day 4 post-transfection with trypan blue and live-dead cells were counted using a Cellometer Auto T4 Cell Viability Counter (Nexcelom Bioscience). pcDNA6/myc-His B and pcDNA5 FRT/TO empty vectors were included as controls (lighter bars). **B-E)** Overexpression of TDP-43 does not induce cell toxicity. **B)** To assess cytotoxicity, TDP-43-V5 wild-type and mutant constructs or pcDNA6/myc-His B empty vector were cotransfected in HeLa cells in quadruplicate wells together with pcDNA3, a vector that expresses the neomycin phosphotransferase gene. Following G418 selection for 18 days, cells were fixed, stained, and antibiotic-resistant colonies were counted. Results are normalized to pcDNA6/myc-His B vector (lighter bar). **C)** Myc-TDP-43, V5-ANG or pcDNA3 empty vector were cotransfected in HeLa cells together with pcDNA6/myc-His B vector and cells were selected on blasticidin antibiotic. Cells were fixed and stained and colonies were counted as above. Results are normalized to pcDNA3 vector (lighter bar). **D)** HEK 293T cells transfected in quadruplicate with plasmids as indicated were stained on day 4 post-transfection with trypan blue and live-dead cells were counted. **E)** Results of MultiTox-Fluor Multiplex Cytotoxicity assay (Promega) showing no cell toxicity caused by overexpression of TDP-43 or FLAG-tagged FUS. Constructs were transfected in 96-well plates (5 wells each) and assayed at day 3. The histogram shows ratios of live to dead cell readings normalized to empty vector control (lighter bar). A-E) single biological replicates are shown. **F)** ALS-associated TBK1 mutations fail to rescue inhibition of cell culture retrotransposition caused by V5-tagged wild-type TBK1 protein. n=number of biological replicates.



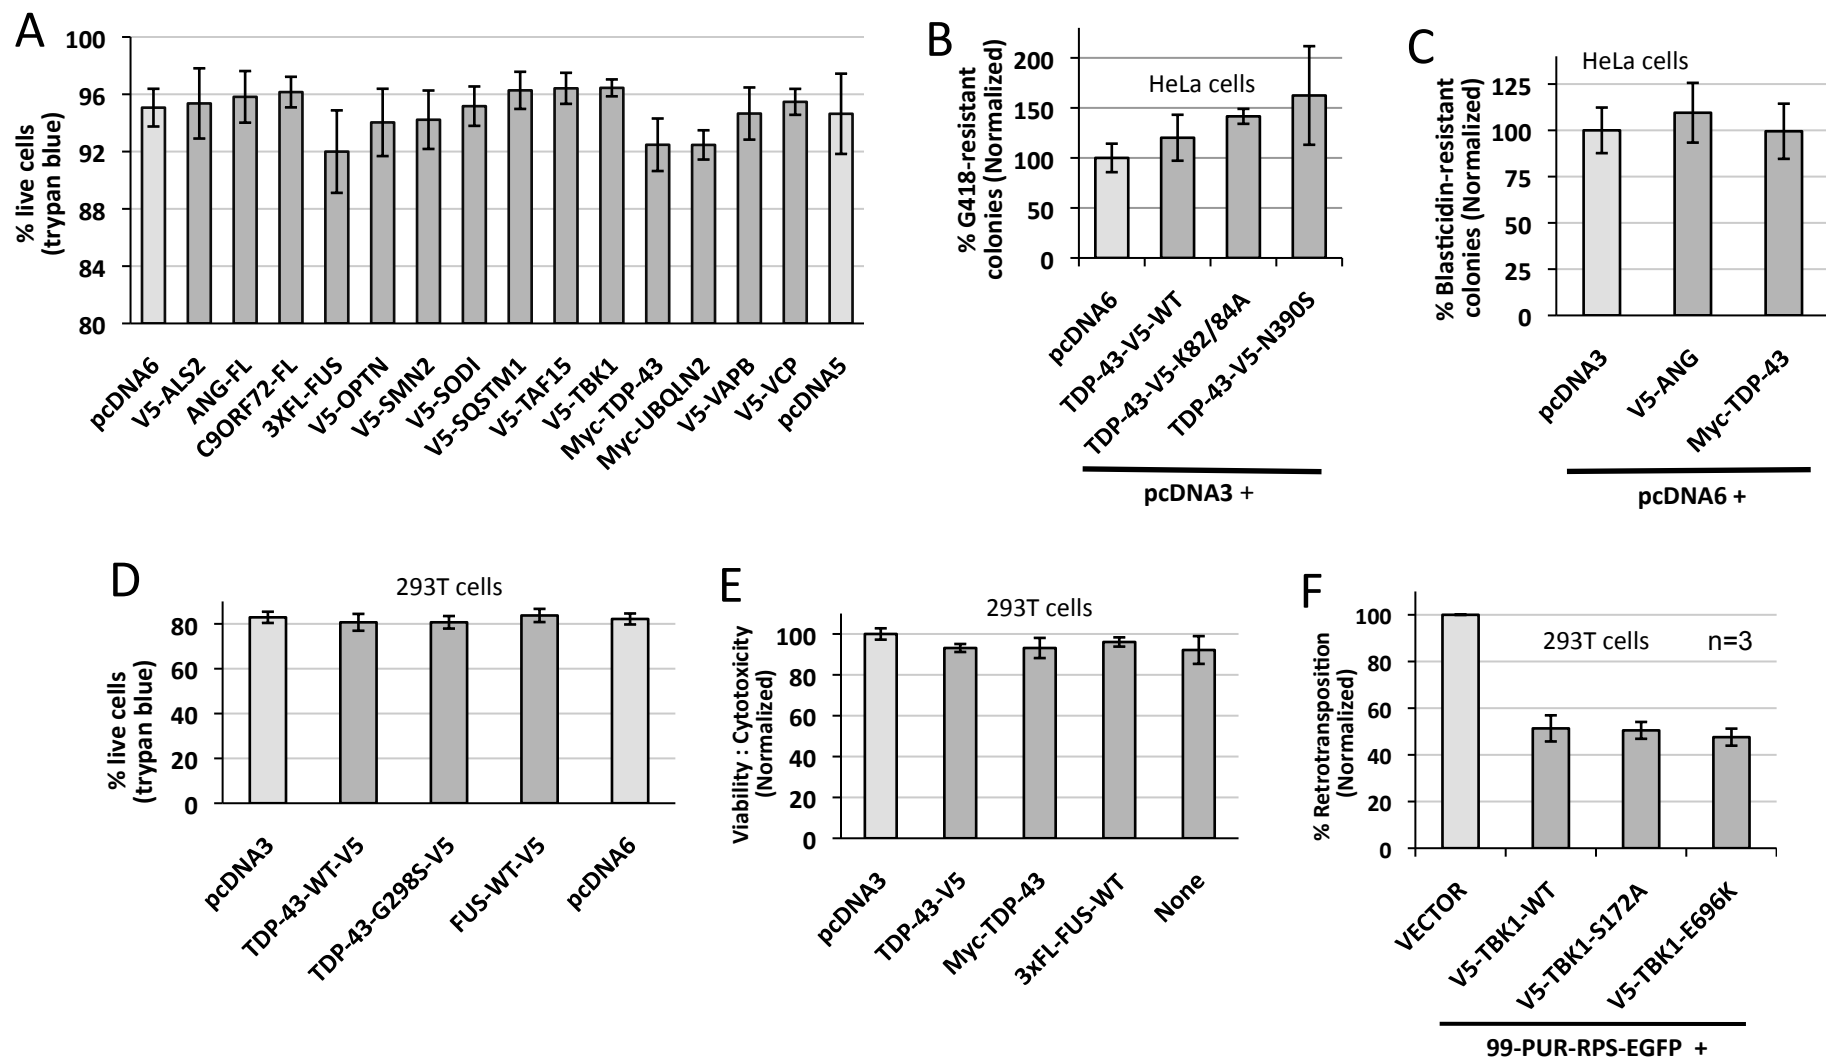

Fig. S4

**Figure S5.** Overexpression or knockdown of TDP-43 protein does not alter L1 expression. **A)** HEK 293T cells were transfected with three different scrambled siRNAs (lanes 1,3,5) or siRNAs directed against TDP-43 (lanes 2 and 4) and tested for their effects on cell culture retrotransposition of 99-PUR-RPS-EGFP. Western blots show that esiTARDBP and si2TDP43 siRNAs decreased endogenous TDP-43 protein levels over 70% in HEK 293T cells but did not affect levels of endogenous L1 ORF1 protein (top) or frequency of L1 retrotransposition (bottom). **B,C)** Ectopic expression of tagged TDP-43 constructs fails to alter (B) levels of endogenous ORF1p or (C) FLAG-tagged ORF1p coexpressed from construct pc-L1-1FH in HEK 293T cells. **D)** Overexpression of TDP-43 protein has little effect on L1 endogenous RNA levels in 293T cells as determined by RT-PCR. Shown are results for two vector control samples (pcDNA3 and pcDNA5) and V5- or Myc-tagged TDP-43 expressing samples. Primer pairs amplified DNA fragments from the 5' UTR or ORF1 regions of endogenous L1s and from the actin beta gene. Water only and reverse transcriptase minus control reactions are also shown.

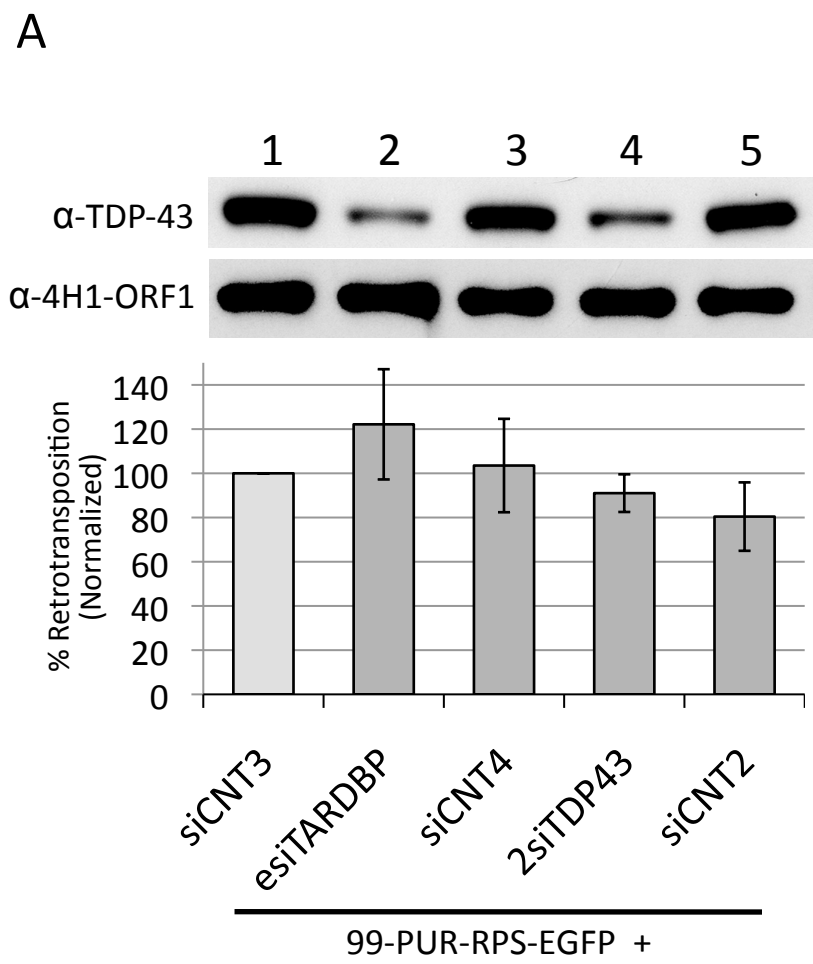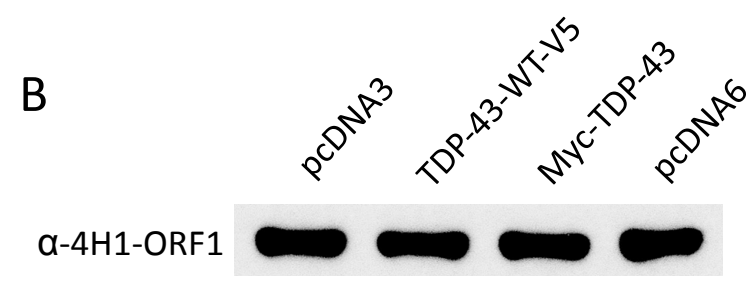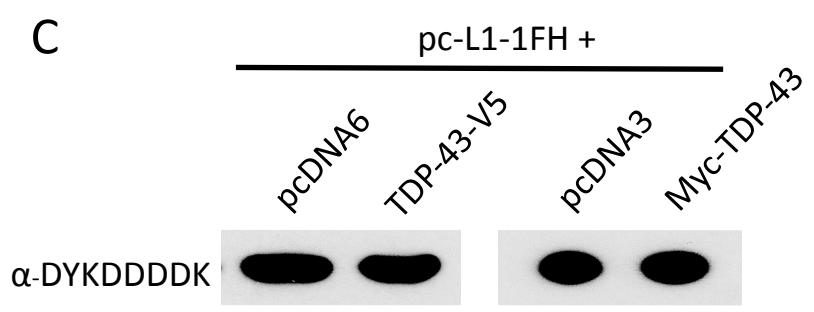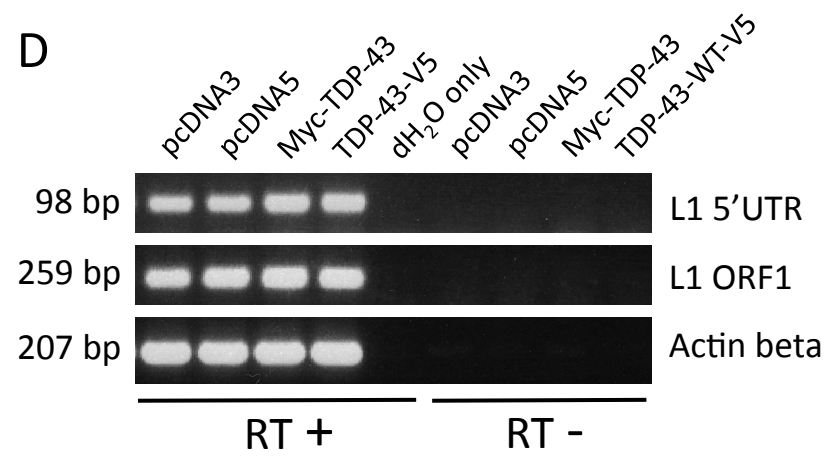

Fig. S5

**Figure S6.** Methylation analyses of the CpG island of the 5' UTR promoter of endogenous L1 elements show effects of altered levels of TDP-43. **A)** The individual methylation status of 18 L1 sequences in the presence (right) or absence (left) of ectopically expressed TDP-43-V5-WT protein. Open circles, closed circles, and crosses represent unmethylated, methylated, and mutated CpG positions, respectively. Average percent CpG methylation was significantly elevated in the presence of elevated TDP-43 protein (\*  $p < 0.05$ ; \*\*  $p < 0.01$ ; \*\*\*  $p < 0.001$ , Fisher's Exact Test as determined by QUMA). One replicate experiment is shown. **B,C)** The individual methylation status of 15 L1 sequences in HEK 293T cells reduced for TDP-43 levels by transfection of siRNAs esiTARDBP or 2siTDP43 (see Figure S5A). Both siRNAs caused a significant increase in CpG methylation of L1 promoters. CpG residues are numbered according to the element L1-RP. One replicate experiment each is shown. **D)** Expression of V5- or FLAG-tagged TDP-43 fails consistently to alter activity in HEK 293T cells of luciferase constructs containing either the sense or antisense L1-RP promoter as determined by the Dual-Glo Luciferase Assay System (Promega). Promoter activity from the antisense strand of the human L1 5' UTR is considerably weaker than from the sense strand [6]. L1 promoter constructs were previously described [A]. pGL3-Basic vector (Promega) lacks eukaryotic promoter and enhancer sequences. The pGL3-Control vector (Promega) contains SV40 promoter and enhancer sequences. Results are normalized to the L1-Sense cotransfected pcDNA3 vector control.

A. Yang N, Kazazian HH. An important role for RUNX3 in human L1 transcription and retrotransposition. *Nucleic Acids Res.* 2003;31(16):4929-40.

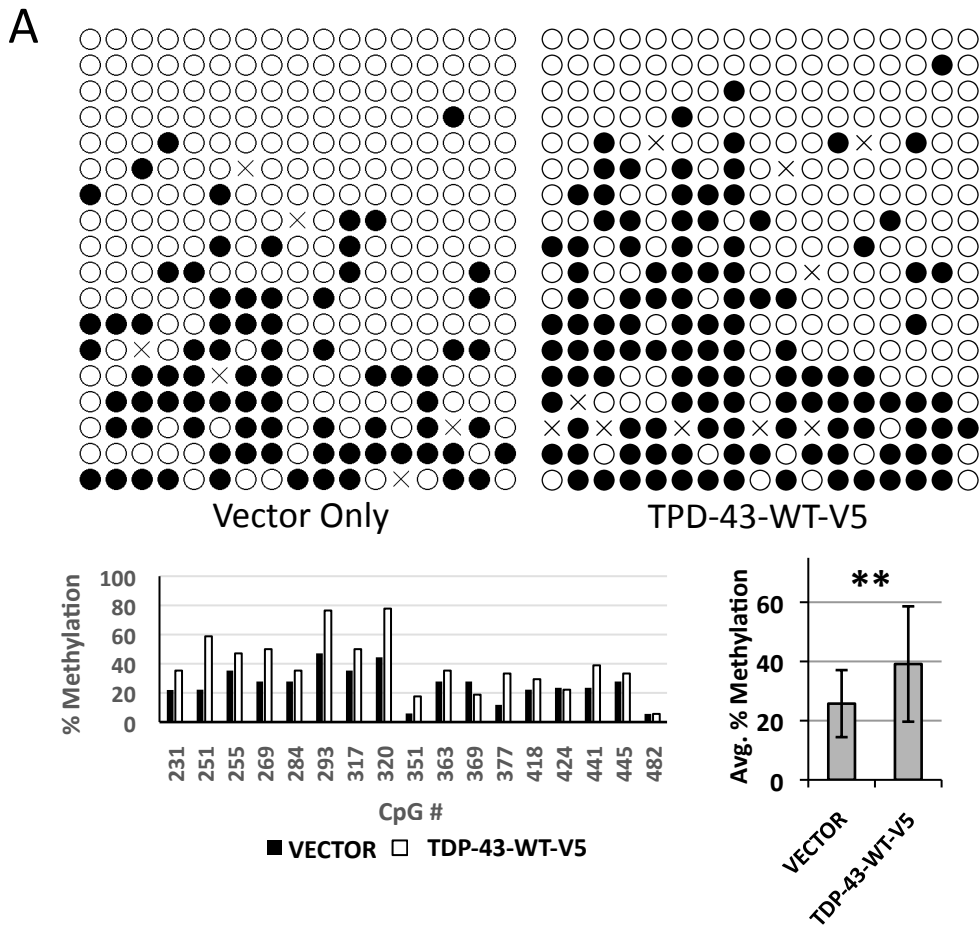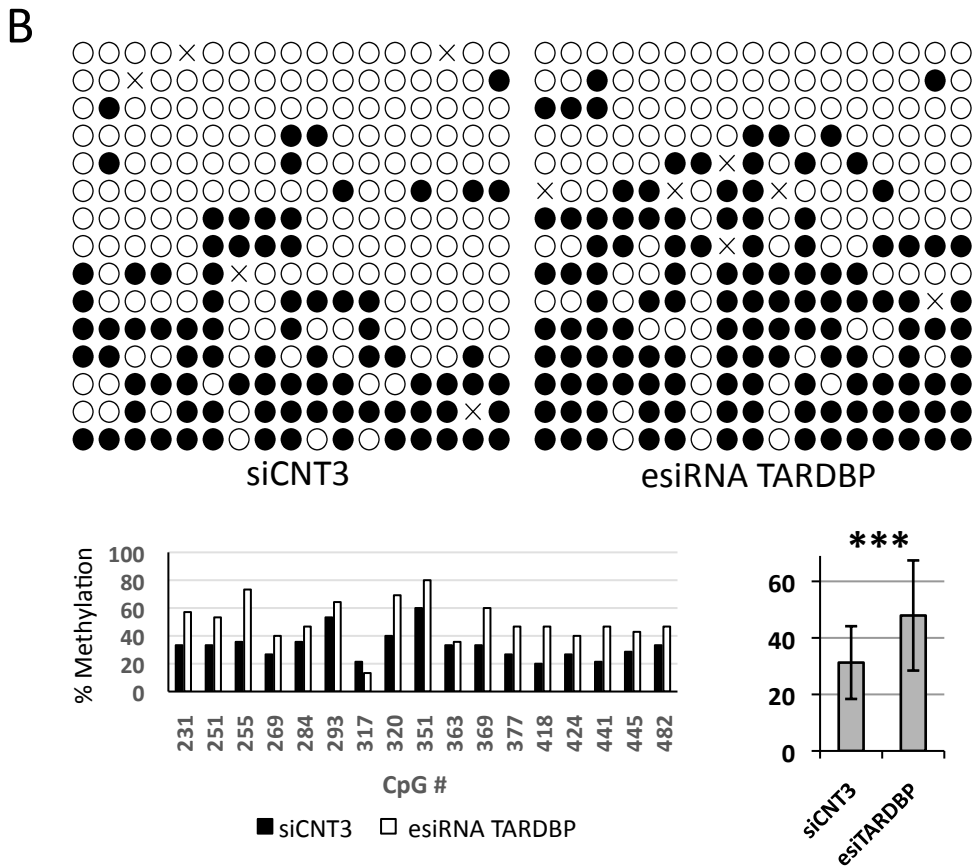

Fig. S6

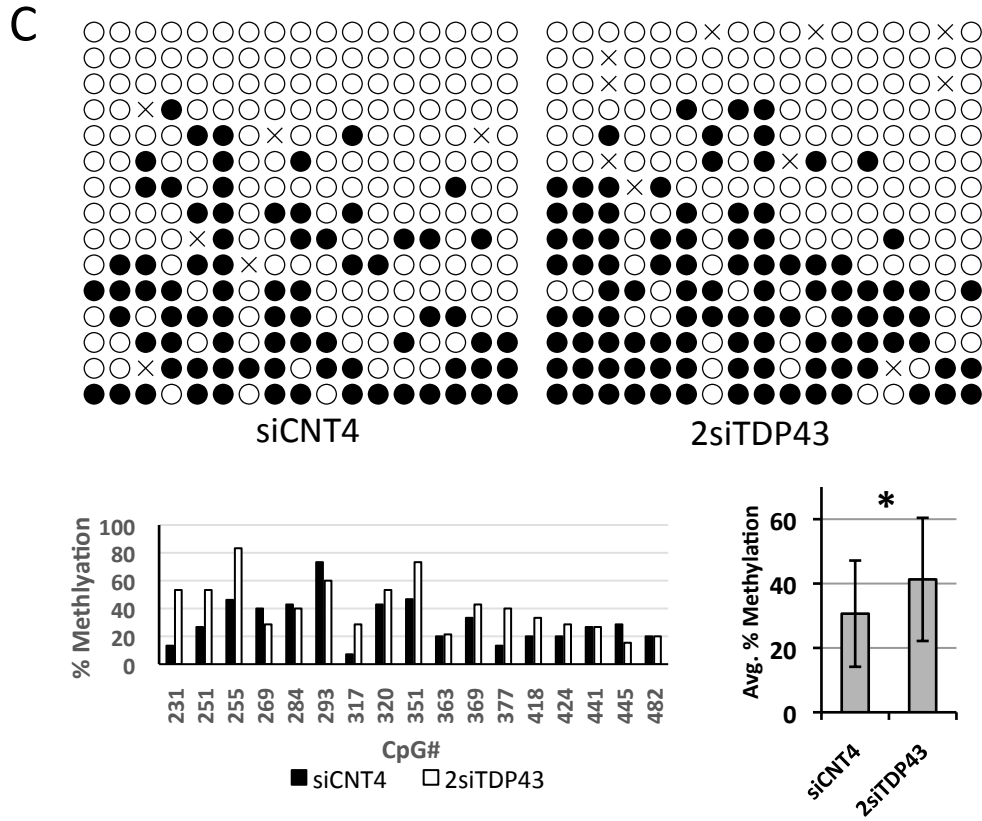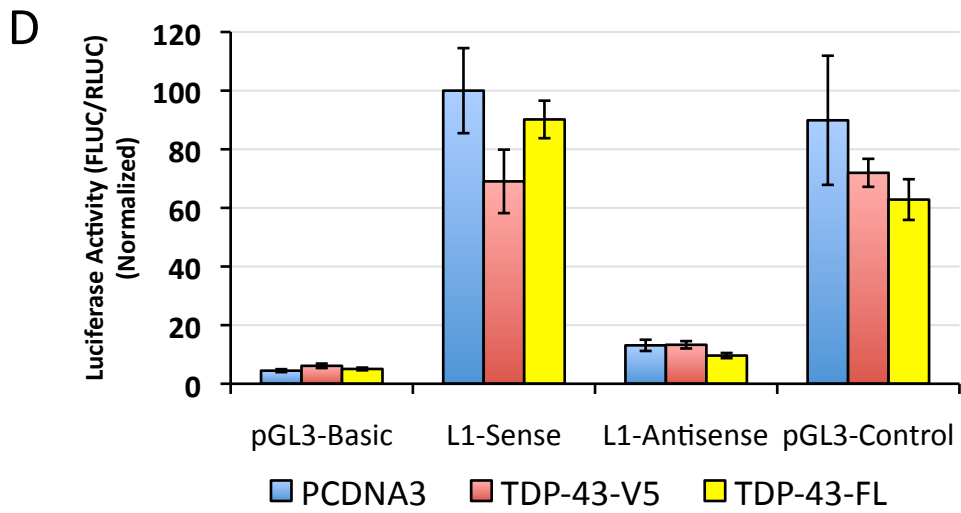

Fig. S6

**Figure S7.** Expression levels of L1 (**A,B**) and Alu (**C,D**) TEs determined by RT-qPCR. Overall transcript levels were measured in samples from various tissue types from ALS patients and non-affected controls employing a previously established strategy [146]. Hippocampal samples were available from ALS patients only. The graphs on the left depict normalized transcript levels determined for individual samples grouped by tissue type and disease state. The right graphs depict averaged normalized transcript levels for those samples and tissue types. Alu and L1 transcript levels are normalized to H9-hESC levels (set to 1), and HEF and HeLa cell results are included in the graphs. Standard errors are indicated for each tissue type. Note that much more variable and often higher transcript levels were determined for cerebellum samples. Only AluS occipital cortex samples showed significantly different transcript levels for ALS patients compared with controls ( $p=0.02$ ; Student's t-test).

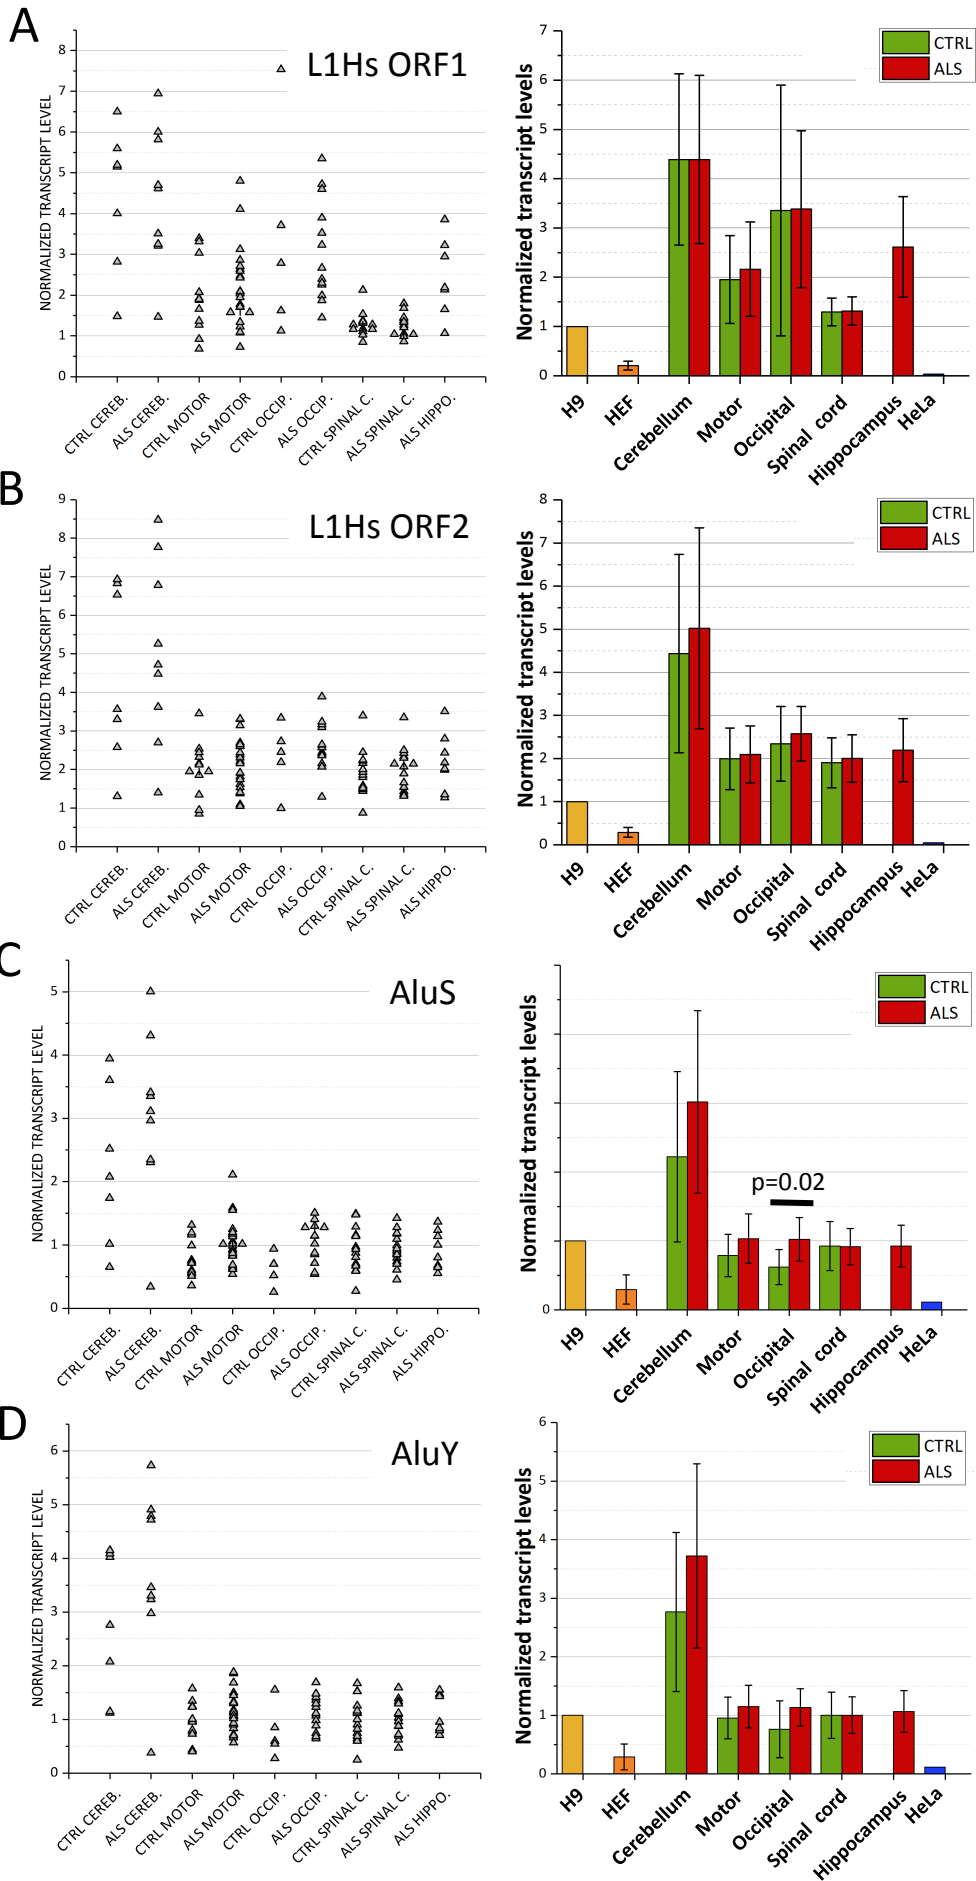

Fig. S7



**Figure S8.** Representative gels showing expression of ORF1p in normal and ALS-associated tissues determined by Western blotting. Fifty  $\mu\text{g}$  of 2102Ep cell lysate and whole tissue lysates from **A)** frontal cortex, **B)** cerebellum, **C)** hippocampus, **D)** motor cortex, and **E)** cervical or thoracic spinal cord samples were probed with mouse monoclonal  $\alpha$ -4H1-ORF1 antibody (right). Left: following antibody probing, the membrane was stained with ponceau S to show transferred protein. Bands consistent in size with full-length ORF1p are indicated by an arrow in E). **F)** Hippocampal samples were reprobed with rabbit polyclonal  $\alpha$ -V14-ORF1 antibody [182]. **G)** Brain and spinal cord samples were also probed with rabbit monoclonal  $\alpha$ -JH73-ORF1 antibody [177].

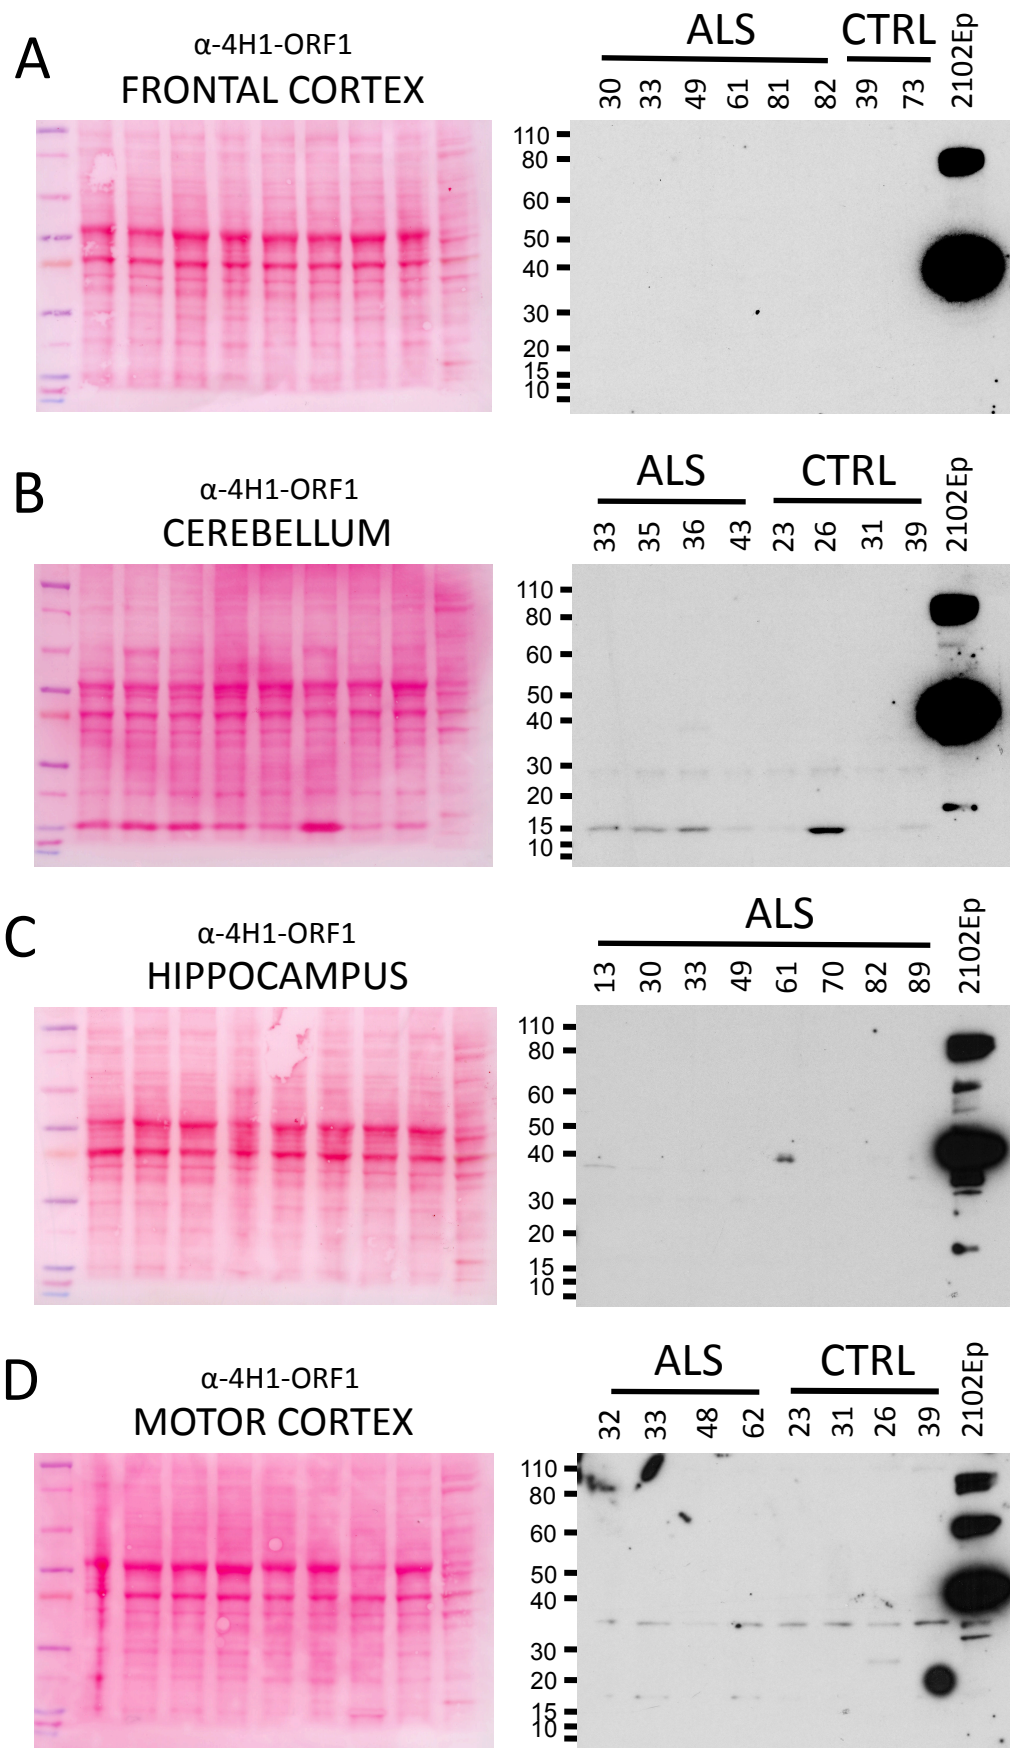

Fig. S8

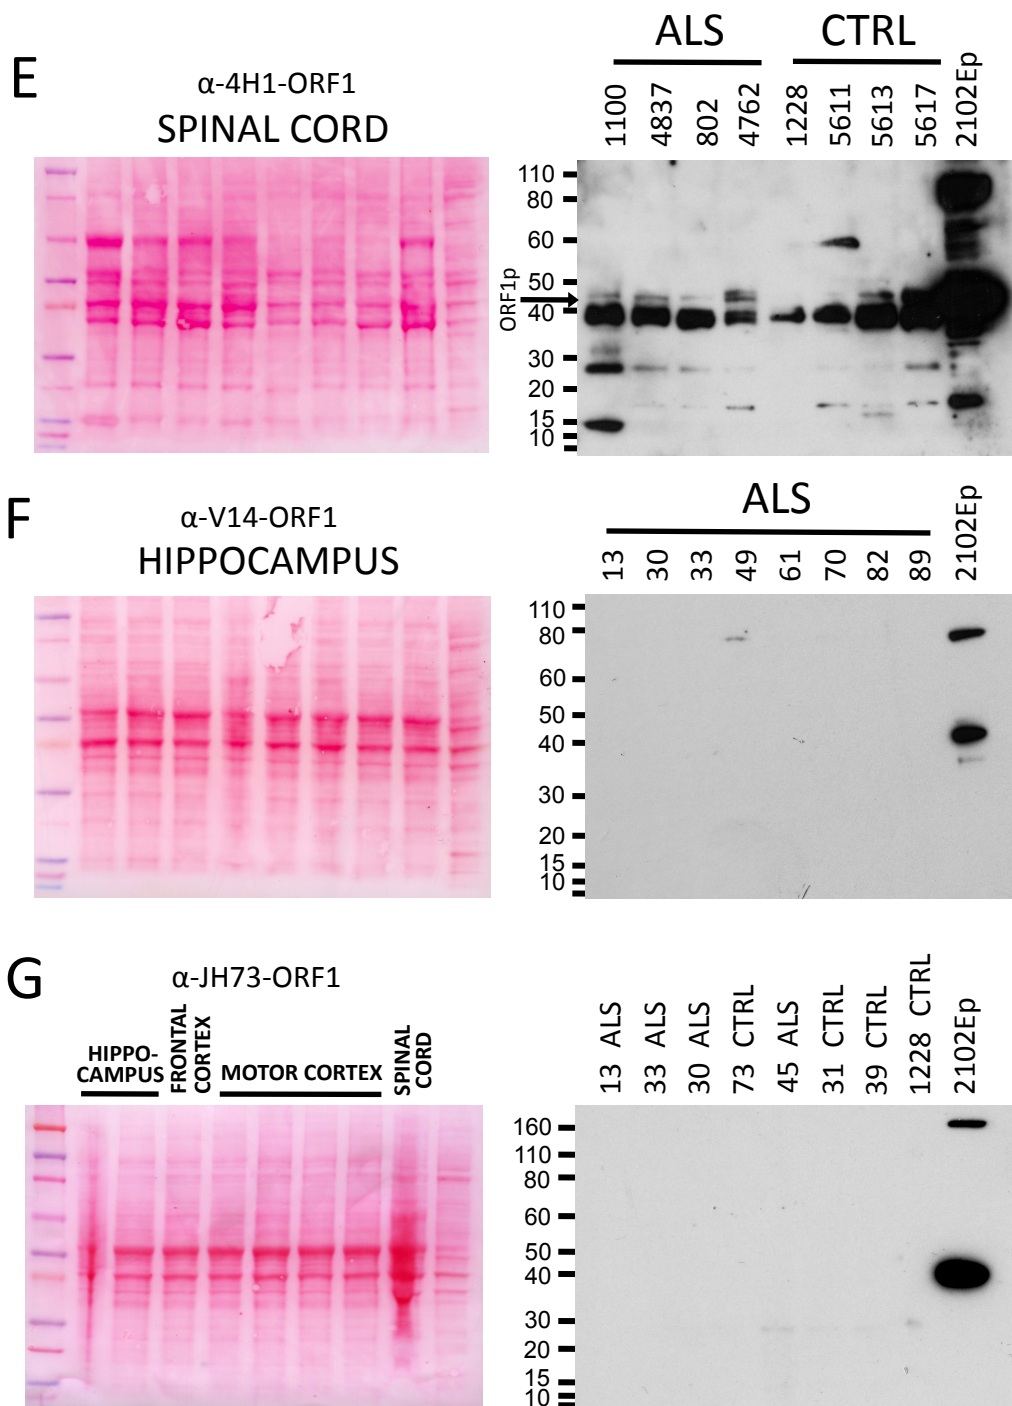

Fig. S8

**Figure S9.** TE locus-specific analyses of the GSE67196 RNA-Seq dataset [171]. **A)** Table summary of the numbers of significant DE TE loci identified in the dataset for selected TE-types. All significant data is presented in Table S3. **B)** PCA analyses for TEs of sALS (blue), C9ALS (green), and control (red) samples in cerebellum (left) and frontal cortex (right) samples. Individual patient samples are numbered. Discrete clustering of C9ALS samples is evident for frontal cortex only. **C)** Hierarchical clustering of differentially expressed TE loci in cerebellum (left) and frontal cortex. Each column of the heat map corresponds to a control, sALS, or C9ALS sample, color-coded as shown in the box, right. Each cell shows the raw Z-score of a single TE element color-coded as shown in the key at top left. Shown are the top 5000 endogenous retroelement loci (eres) with the largest standard deviations (SD) between samples.

A

| TE TYPE      | C9ALS vs sALS |            |             |               |             | C9ALS vs Ctrl |           |            |             | sALS vs Ctrl |           |           |             |
|--------------|---------------|------------|-------------|---------------|-------------|---------------|-----------|------------|-------------|--------------|-----------|-----------|-------------|
|              | TOTAL DE      | DE Down    | DE Up       | TOTAL LOCI    | % DE LOCI   | TOTAL DE      | DE Down   | DE Up      | % DE LOCI   | TOTAL DE     | DE Down   | DE Up     | % DE LOCI   |
| LINE 1       | 951           | 86         | 865         | 48187         | 1.97        | 174           | 6         | 168        | 0.36        | 24           | 11        | 13        | 0.05        |
| LINE 2       | 486           | 53         | 433         | 21315         | 2.28        | 108           | 4         | 104        | 0.51        | 17           | 10        | 7         | 0.08        |
| LTR/ERV1     | 216           | 24         | 192         | 9048          | 2.39        | 43            | 5         | 38         | 0.48        | 6            | 3         | 3         | 0.07        |
| LTR/ERVK     | 18            | 3          | 15          | 1196          | 1.51        | 4             | 0         | 4          | 0.33        | 1            | 0         | 1         | 0.08        |
| LTR/ERVLMaLR | 247           | 40         | 207         | 13775         | 1.79        | 46            | 5         | 41         | 0.33        | 11           | 3         | 8         | 0.08        |
| LTR/ERVL     | 106           | 22         | 84          | 6319          | 1.68        | 15            | 1         | 14         | 0.24        | 5            | 0         | 5         | 0.08        |
| SVAs         | 17            | 1          | 16          | 1240          | 1.37        | 4             | 0         | 4          | 0.32        | 0            | 0         | 0         | 0.00        |
| SINE/Alu     | 1194          | 19         | 1175        | 67802         | 1.76        | 146           | 8         | 138        | 0.22        | 16           | 16        | 0         | 0.02        |
| SINE/MIR     | 339           | 59         | 280         | 19593         | 1.73        | 64            | 1         | 63         | 0.33        | 15           | 1         | 14        | 0.08        |
| DNA          | 307           | 53         | 254         | 19053         | 1.61        | 37            | 2         | 35         | 0.19        | 11           | 3         | 8         | 0.06        |
| ?            | 82            |            |             |               |             | 11            |           |            |             | 3            |           |           |             |
| <b>TOTAL</b> | <b>3963</b>   | <b>360</b> | <b>3521</b> | <b>207528</b> | <b>1.81</b> | <b>652</b>    | <b>32</b> | <b>609</b> | <b>0.33</b> | <b>109</b>   | <b>47</b> | <b>59</b> | <b>0.06</b> |

B

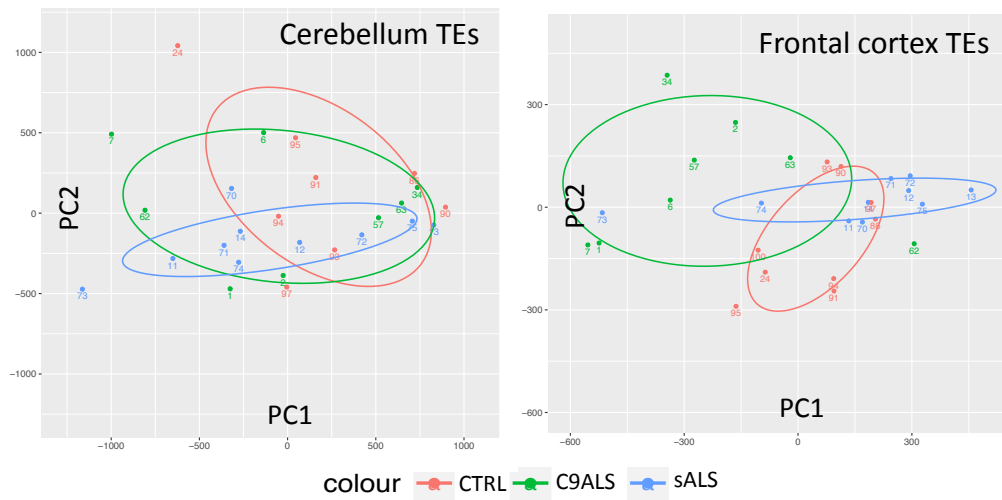

C

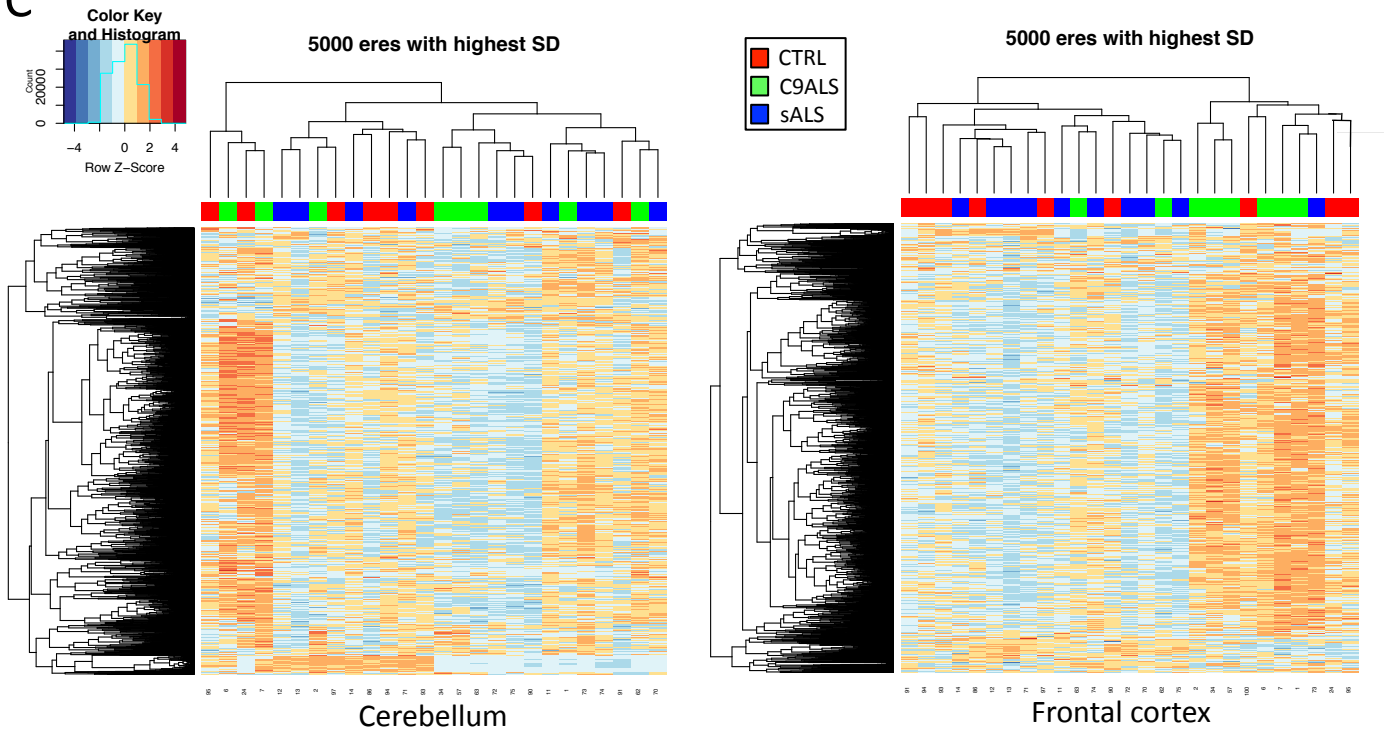

Fig. S9
