# Supplementary material for: Properties of LINE-1 proteins and repeat element expression in the context of amyotrophic lateral sclerosis
Source: Mob DNA. 2018 Dec 15;9:35. doi: 10.1186/s13100-018-0138-z (PMC6295051; doi:10.1186/s13100-018-0138-z)
Supplement: Supplementary file 2 — Table S1. Summary of significant DE TE subfamilies determined by TEtranscripts RNA-Seq datasets. (XLSX 326 kb) [file 13100_2018_138_MOESM2_ESM.xlsx]

## Sheet: Table S1 - TEtranscripts
	Table S1. Summary of significant DE TE subfamilies determined by TEtranscripts for RNA-Seq datasets
		Decrease in log2FoldChange
		Increase in log2FoldChange
	Ordered by TE class and padj
	TE Type	Class	Type	baseMean	log2FoldChange	lfcSE	stat	Average read counts-Test	Average read counts-Control	pvalue	padj < 0.05
	GSE77702
	TDP-43 KD vs Control
	FordPrefect	DNA	hAT-Tip100	3301.68	-1.17	0.1	-11.66	2351	4121	1.96716e-31	5.3313e-29
	Charlie15b	DNA	hAT-Charlie	1208.68	-0.42	0.11	-3.89	1230	1233	9.98541e-05	0.00126606
	MamRep4096	DNA	hAT-Tip100	404.4	0.59	0.15	3.9	593	280	9.5859e-05	0.00122166
	Arthur1	DNA	hAT-Tip100	428.75	0.44	0.14	3.04	599	317	0.00236714	0.017751
	MER45B	DNA	hAT-Tip100	216.21	0.56	0.19	2.98	323	150	0.00285234	0.0206571
	MER45A	DNA	hAT-Tip100	784.74	0.32	0.12	2.63	1053	614	0.00852993	0.0492625
	L1MA1	LINE	L1	3142.58	0.59	0.11	5.5	4600	2217	3.77473e-08	1.05601e-06
	L1PB2	LINE	L1	2192.66	0.6	0.11	5.31	3218	1538	1.098e-07	2.83406e-06
	L1PA17	LINE	L1	2830.45	0.57	0.11	5.04	4152	2007	4.75301e-07	1.08475e-05
	L1PREC2	LINE	L1	7011.21	0.51	0.1	5.04	10049	5111	4.76493e-07	1.08604e-05
	L1PBa	LINE	L1	1992.36	0.6	0.12	4.94	2955	1395	8.00282e-07	1.75043e-05
	L1HS	LINE	L1	2170.13	0.57	0.12	4.76	3187	1541	1.9197e-06	3.8494e-05
	L1PB4	LINE	L1	3808.75	0.5	0.11	4.71	5444	2789	2.46674e-06	4.83999e-05
	L1M2	LINE	L1	4234.75	0.47	0.1	4.55	5971	3148	5.38701e-06	9.73278e-05
	L1MA4	LINE	L1	5430.19	0.44	0.1	4.5	7615	4066	6.9403e-06	0.000121473
	L1MCa	LINE	L1	3608.42	0.47	0.11	4.44	5109	2675	8.8632e-06	0.000150276
	L1MA8	LINE	L1	4944.5	0.44	0.1	4.42	6934	3705	9.90803e-06	0.000166204
	L1MEc	LINE	L1	8486.62	0.43	0.1	4.37	11854	6399	1.22122e-05	0.000199831
	L1MEf	LINE	L1	5565.76	0.45	0.1	4.36	7799	4177	1.30236e-05	0.000210525
	L1MC1	LINE	L1	7612.41	0.43	0.1	4.34	10613	5750	1.42845e-05	0.000228106
	L1MCb	LINE	L1	756.93	0.61	0.14	4.28	1134	524	1.87404e-05	0.000290744
	L1PA12	LINE	L1	3242.64	0.41	0.1	4.27	4478	2458	1.97444e-05	0.000304144
	L1MA5A	LINE	L1	1957.86	0.45	0.11	4.23	2755	1456	2.35302e-05	0.000356758
	L1MA9	LINE	L1	7520	0.41	0.1	4.2	10433	5714	2.66684e-05	0.000399105
	L1ME5	LINE	L1	919.33	0.54	0.13	4.16	1345	654	3.2249e-05	0.000469654
	L1P2	LINE	L1	2834.93	0.47	0.11	4.14	4028	2104	3.52704e-05	0.000509804
	L1MC3	LINE	L1	6638.74	0.38	0.09	4.1	9112	5094	4.12653e-05	0.000584282
	L1MC2	LINE	L1	3213	0.41	0.1	4.07	4447	2441	4.76179e-05	0.000661805
	L1MEh	LINE	L1	777.64	0.51	0.13	3.96	1119	561	7.47324e-05	0.000979768
	L1PB	LINE	L1	830.16	0.5	0.13	3.95	1192	602	7.84982e-05	0.00102527
	L1MA6	LINE	L1	2933.46	0.41	0.11	3.85	4082	2227	0.000119497	0.00146998
	L1MA5	LINE	L1	3037.42	0.35	0.09	3.77	4117	2353	0.000160612	0.00190238
	L1MB1	LINE	L1	2658.61	0.39	0.1	3.74	3674	2031	0.000180913	0.002106
	L1MA10	LINE	L1	1415.1	0.46	0.12	3.73	1996	1055	0.000189134	0.00218679
	L1MA7	LINE	L1	4080.95	0.34	0.09	3.72	5497	3185	0.000197144	0.00226454
	L1P3	LINE	L1	2783.99	0.41	0.11	3.69	3878	2118	0.000220636	0.002498
	L2a	LINE	L2	66679.1	0.35	0.1	3.69	90250	52131	0.000228262	0.00257406
	L1M4c	LINE	L1	2053.65	0.4	0.11	3.68	2848	1563	0.000234076	0.00262616
	L1MB3	LINE	L1	8697.97	0.34	0.09	3.65	11789	6793	0.000265106	0.00291214
	L1MEg	LINE	L1	6358.49	0.33	0.09	3.64	8575	4978	0.000272012	0.00297857
	L1MDa	LINE	L1	4127.73	0.38	0.1	3.61	5652	3190	0.000305163	0.00327338
	L1M4b	LINE	L1	2302.57	0.38	0.11	3.59	3163	1770	0.000329233	0.00349697
	L1M4a1	LINE	L1	1258.3	0.38	0.11	3.55	1729	958	0.000390345	0.00403488
	L1M4	LINE	L1	9922.37	0.28	0.08	3.41	13079	7922	0.000638059	0.00612191
	HAL1	LINE	L1	12149.6	0.3	0.09	3.38	16270	9617	0.000735676	0.00687146
	L1ME3A	LINE	L1	5767.01	0.28	0.08	3.36	7635	4587	0.000780657	0.00724478
	L1MCc	LINE	L1	1132.79	0.44	0.13	3.34	1614	845	0.000826981	0.00757738
	L2-3_Crp	LINE	L2	598.17	0.49	0.15	3.33	855	439	0.000877917	0.00795168
	L2b	LINE	L2	33544.6	0.31	0.09	3.32	44770	26637	0.000890458	0.00805686
	L1ME1	LINE	L1	16547.9	0.28	0.08	3.3	21906	13220	0.000976746	0.0086796
	L1M7	LINE	L1	1182	0.4	0.12	3.23	1641	902	0.0012278	0.0105011
	L1P4	LINE	L1	1418.66	0.4	0.13	3.2	1986	1080	0.00136441	0.0114656
	L1MB7	LINE	L1	13299.1	0.27	0.08	3.18	17553	10657	0.0014519	0.0120548
	L1MEi	LINE	L1	1859	0.37	0.12	3.18	2571	1431	0.00147818	0.0122033
	L1MB5	LINE	L1	4687.1	0.3	0.1	3.17	6274	3714	0.00152115	0.0124867
	L1MEd	LINE	L1	9594.92	0.28	0.09	3.17	12724	7666	0.0015438	0.0126427
	L1MD1	LINE	L1	4599.79	0.3	0.1	3.16	6164	3642	0.00157785	0.0128443
	L2c	LINE	L2	53205.6	0.28	0.09	3.13	70196	42713	0.00173227	0.013808
	L1PBa1	LINE	L1	679.25	0.4	0.13	3.12	940	513	0.00178835	0.0141898
	L1MDb	LINE	L1	299.1	0.55	0.18	3.12	438	211	0.00179984	0.0142614
	L1MC4	LINE	L1	11860.7	0.25	0.08	3.09	15559	9552	0.00200566	0.0155374
	L1MD	LINE	L1	4134.18	0.27	0.09	3.08	5435	3310	0.00207559	0.0159863
	L1MB2	LINE	L1	4652.89	0.29	0.1	3.08	6216	3697	0.00210177	0.0161056
	L1MC	LINE	L1	2367.1	0.31	0.1	3.02	3155	1876	0.00252143	0.0186308
	L1ME2z	LINE	L1	2689.2	0.29	0.1	3.01	3571	2139	0.0025852	0.0190485
	L1MB8	LINE	L1	9189.87	0.25	0.08	2.95	12027	7425	0.00318348	0.0225838
	L1PA11	LINE	L1	4091.46	0.58	0.2	2.92	6182	2783	0.00346271	0.0240531
	L1MB4	LINE	L1	4459.2	0.26	0.09	2.91	5882	3579	0.00360803	0.0248634
	L1M3f	LINE	L1	557.68	0.41	0.14	2.9	774	422	0.00376405	0.0257341
	L1M5	LINE	L1	18162.4	0.22	0.08	2.88	23452	14813	0.00398964	0.0269252
	L1P4a	LINE	L1	484.74	0.44	0.15	2.86	681	363	0.00420819	0.0281059
	L1ME2	LINE	L1	5767.22	0.25	0.09	2.85	7551	4659	0.00434089	0.0288478
	L1MD3	LINE	L1	2670.58	0.26	0.09	2.8	3503	2146	0.00513383	0.0331015
	L1M3	LINE	L1	2334.61	0.31	0.11	2.79	3150	1848	0.00530927	0.0340067
	L1PB3	LINE	L1	2170.65	0.55	0.2	2.78	3238	1503	0.00547194	0.0348169
	L1MC5a	LINE	L1	6897.93	0.22	0.08	2.77	8934	5607	0.00552606	0.0351348
	L1M1	LINE	L1	5920.28	0.52	0.19	2.77	8687	4194	0.00561697	0.0355371
	L1M3c	LINE	L1	476.82	0.42	0.15	2.76	668	359	0.00575093	0.0362595
	L2-1_AMi	LINE	L2	254.68	0.5	0.18	2.72	370	184	0.00662635	0.0404555
	L1MA2	LINE	L1	5374.92	0.48	0.18	2.68	7802	3869	0.00726726	0.0434474
	L1M3b	LINE	L1	159.47	0.55	0.2	2.66	240	110	0.00770257	0.0454117
	L1ME3	LINE	L1	3524.86	0.25	0.1	2.66	4627	2848	0.00773071	0.0455466
	L1MC5	LINE	L1	5549.07	0.25	0.09	2.64	7279	4499	0.00832746	0.0482915
	L1PB1	LINE	L1	12239.6	0.52	0.2	2.62	18131	8594	0.00867811	0.0499401
	MamGyp-int	LTR	Gypsy	1715.1	-0.63	0.09	-6.62	1598	1824	3.55778e-11	1.68606e-09
	LTR7B	LTR	ERV1	303.77	0.88	0.17	5.07	495	180	3.99065e-07	9.27853e-06
	HERVK-int	LTR	ERVK	1537.58	0.43	0.09	4.57	2114	1140	4.78746e-06	8.79645e-05
	HERVH48-int	LTR	ERV1	64.15	1.14	0.25	4.5	128	24	6.74543e-06	0.000118666
	MER31A	LTR	ERV1	397.41	0.73	0.17	4.36	616	258	1.3162e-05	0.000212367
	HERV9-int	LTR	ERV1	341.74	0.7	0.17	4.21	528	223	2.50469e-05	0.000377117
	MER39	LTR	ERV1	803.74	0.56	0.13	4.21	1164	573	2.56778e-05	0.000385612
	ERVL-B4-int	LTR	ERVL	1832.39	0.47	0.12	3.91	2596	1363	9.2672e-05	0.00118452
	MLT2B1	LTR	ERVL	1045.7	0.48	0.13	3.87	1499	764	0.000107768	0.00134781
	LTR85c	LTR	Gypsy	207.19	0.75	0.2	3.84	333	128	0.000121445	0.00149077
	MER52-int	LTR	ERV1	115.06	0.89	0.23	3.81	203	62	0.000138603	0.00167514
	LTR8B	LTR	ERV1	434.1	0.58	0.16	3.68	648	302	0.000235183	0.00263347
	HERV16-int	LTR	ERVL	438.21	0.63	0.17	3.66	666	300	0.000256009	0.00282653
	LTR78	LTR	ERV1	1426.96	0.46	0.13	3.64	2027	1063	0.000274191	0.00299364
	HERVFH21-int	LTR	ERV1	50.81	0.92	0.26	3.6	96	22	0.000318036	0.00339605
	HERVK3-int	LTR	ERVK	938.74	0.4	0.11	3.6	1291	705	0.000322428	0.0034331
	LTR85a	LTR	Gypsy	333.68	0.62	0.17	3.59	509	226	0.00032532	0.00345964
	HERVL-int	LTR	ERVL	2509.58	0.37	0.1	3.55	3434	1937	0.000386219	0.00400177
	HERV9N-int	LTR	ERV1	132.7	0.77	0.22	3.54	217	80	0.000403216	0.00414569
	LTR16C	LTR	ERVL	1716.12	0.44	0.12	3.53	2412	1295	0.000410832	0.00421401
	MER4-int	LTR	ERV1	793.86	0.42	0.12	3.47	1102	595	0.000521981	0.00516104
	HERVK9-int	LTR	ERVK	1934.26	0.31	0.09	3.41	2580	1509	0.000640197	0.00613493
	HERV17-int	LTR	ERV1	391.76	0.59	0.17	3.38	593	272	0.000716631	0.00674076
	LTR46-int	LTR	ERV1	38.43	0.87	0.26	3.38	72	16	0.000719371	0.00675189
	MER4D	LTR	ERV1	343.85	0.59	0.17	3.37	514	239	0.000739648	0.00690484
	MER54A	LTR	ERVL	216.53	0.7	0.21	3.35	345	140	0.000802807	0.00740487
	LTR12B	LTR	ERV1	90.49	0.78	0.23	3.34	150	51	0.000824654	0.00756006
	MER41A	LTR	ERV1	808.28	0.42	0.13	3.34	1132	606	0.000850232	0.00775122
	LTR7	LTR	ERV1	419.93	0.56	0.17	3.32	631	294	0.000906498	0.00818065
	MLT1H2	LTR	ERVL-MaLR	837.58	0.42	0.13	3.3	1170	631	0.000964329	0.00859522
	LOR1-int	LTR	ERV1	483.62	0.46	0.14	3.28	681	355	0.00104397	0.00917621
	MLT1J1	LTR	ERVL-MaLR	917.62	0.41	0.13	3.27	1280	694	0.00107368	0.00938182
	HERV9NC-int	LTR	ERV1	586.92	0.44	0.13	3.26	821	437	0.00113087	0.00979771
	MLT2A2	LTR	ERVL	1225.63	0.38	0.12	3.25	1694	937	0.00113459	0.00982504
	MLT1D	LTR	ERVL-MaLR	9293.62	0.32	0.1	3.24	12562	7325	0.00118814	0.0102021
	LTR19A	LTR	ERV1	184.78	0.66	0.21	3.22	286	121	0.00128255	0.0109048
	MER65A	LTR	ERV1	455.88	0.5	0.16	3.22	662	330	0.00130076	0.0110219
	MER89	LTR	ERV1	378.12	0.48	0.15	3.21	538	272	0.00133498	0.0112622
	MSTD	LTR	ERVL-MaLR	2442.39	0.32	0.1	3.17	3274	1924	0.00153553	0.0125809
	MER39B	LTR	ERV1	485.78	0.45	0.14	3.17	682	359	0.00154613	0.0126558
	MLT1B	LTR	ERVL-MaLR	5550.04	0.33	0.11	3.15	7509	4373	0.00162119	0.0131125
	LTR16E1	LTR	ERVL	576.62	0.49	0.16	3.15	838	421	0.00162622	0.0131378
	MLT2D	LTR	ERVL	966.41	0.38	0.12	3.14	1330	740	0.00167962	0.0134937
	MLT1J-int	LTR	ERVL-MaLR	314.55	0.52	0.17	3.14	459	223	0.00169281	0.0135745
	ERV3-16A3_LTR	LTR	ERVL	168.62	0.66	0.21	3.13	266	110	0.00177673	0.0141041
	MamGypLTR3a	LTR	Gypsy	235.9	0.58	0.19	3.12	353	163	0.00182941	0.0144495
	LTR22A	LTR	ERVK	50.54	0.79	0.25	3.1	90	26	0.00193335	0.0150714
	HERVIP10F-int	LTR	ERV1	312.53	0.52	0.17	3.09	457	222	0.00203402	0.015708
	LTR23	LTR	ERV1	199.96	0.58	0.19	3.08	300	136	0.00208767	0.0160437
	LTR39	LTR	ERV1	345.54	0.49	0.16	3.08	500	247	0.00210322	0.0161061
	LTR19B	LTR	ERV1	60.05	0.77	0.25	3.07	104	32	0.00212577	0.0162358
	LTR26C	LTR	ERV1	48.01	0.78	0.26	3.06	88	23	0.0022155	0.0168322
	LTR49-int	LTR	ERV1	595.3	0.42	0.14	3.05	830	448	0.00228163	0.0172376
	MLT2B3	LTR	ERVL	1247.7	0.37	0.12	3.04	1724	960	0.00237311	0.0177881
	MER21C	LTR	ERVL	3279.42	0.31	0.1	3.04	4353	2603	0.00237653	0.0178005
	LTR60B	LTR	ERV1	79.56	0.75	0.25	3.03	139	45	0.00247768	0.0183813
	LTR54B	LTR	ERV1	190.02	0.57	0.19	3	283	129	0.00266832	0.0195778
	MER31B	LTR	ERV1	472.97	0.49	0.16	3	684	347	0.00274301	0.0200235
	LTR81C	LTR	Gypsy	105.06	0.69	0.23	2.99	171	65	0.00274617	0.0200235
	LOR1b	LTR	ERV1	252.01	0.52	0.17	2.99	365	178	0.00275862	0.0200959
	HERVK22-int	LTR	ERVK	421.22	0.44	0.15	2.97	589	312	0.00294075	0.0212265
	MER74A	LTR	ERVL	754.08	0.38	0.13	2.97	1029	578	0.00294293	0.0212334
	LTR50	LTR	ERVL	635.9	0.43	0.14	2.97	899	477	0.00296773	0.0213856
	LTR9	LTR	ERV1	179.7	0.62	0.21	2.96	279	120	0.00302825	0.0216956
	LTR48B	LTR	ERV1	337.75	0.5	0.17	2.96	488	245	0.00305512	0.021852
	MLT1H	LTR	ERVL-MaLR	2309.15	0.35	0.12	2.95	3159	1806	0.00314673	0.022378
	MLT1J	LTR	ERVL-MaLR	3647.3	0.31	0.11	2.95	4899	2894	0.00319795	0.0226495
	LTR9A1	LTR	ERV1	103.84	0.68	0.23	2.94	167	65	0.00324144	0.022892
	MLT2C1	LTR	ERVL	420.08	0.46	0.16	2.93	595	311	0.00335475	0.0234819
	MER87B	LTR	ERV1	31.39	0.74	0.26	2.9	58	14	0.00376939	0.0257536
	MER51D	LTR	ERV1	162.98	0.56	0.2	2.89	240	110	0.00384391	0.0261564
	MER4E1	LTR	ERV1	361.44	0.44	0.15	2.89	508	266	0.00385001	0.0261876
	LTR37-int	LTR	ERV1	389.28	0.45	0.16	2.89	547	288	0.00388864	0.026378
	LTR103b_Mam	LTR	ERV1	147.1	0.6	0.21	2.89	225	98	0.00391354	0.0265365
	LTR10A	LTR	ERV1	132.56	0.64	0.22	2.88	211	86	0.00399105	0.0269252
	PABL_B-int	LTR	ERV1	131.42	0.6	0.21	2.86	199	86	0.00419083	0.0280008
	LTR8	LTR	ERV1	1168.54	0.36	0.12	2.85	1605	907	0.00432986	0.0287855
	LTR29	LTR	ERV1	189.09	0.54	0.19	2.85	277	131	0.00436552	0.0289449
	MER4A1	LTR	ERV1	666.23	0.36	0.13	2.84	910	511	0.00451397	0.0298153
	MLT1A	LTR	ERVL-MaLR	2855.43	0.31	0.11	2.84	3864	2256	0.00451961	0.0298194
	LTR38C	LTR	ERV1	26.62	0.72	0.25	2.84	51	11	0.00456318	0.0300373
	MamGypLTR1b	LTR	Gypsy	198.5	0.58	0.21	2.8	306	136	0.00506869	0.0327924
	MLT1O	LTR	ERVL-MaLR	1027.65	0.34	0.12	2.79	1401	800	0.00532191	0.0340713
	MamGypLTR1a	LTR	Gypsy	175.3	0.58	0.21	2.78	268	120	0.00538898	0.0344279
	MLT1J2	LTR	ERVL-MaLR	1554.4	0.31	0.11	2.78	2080	1231	0.00542998	0.0345916
	MER4B	LTR	ERV1	626.98	0.4	0.14	2.78	874	478	0.00545218	0.0347039
	LTR51	LTR	ERV1	96.88	0.63	0.23	2.75	152	62	0.00587362	0.0368759
	MER92B	LTR	ERV1	324.08	0.5	0.18	2.75	471	236	0.00603123	0.0376572
	MLT1H-int	LTR	ERVL-MaLR	210.75	0.52	0.19	2.74	309	149	0.00608	0.0378799
	LTR89	LTR	ERVL	221.72	0.51	0.18	2.74	321	158	0.00615775	0.0382543
	ERV24_Prim-int	LTR	ERV1	93.26	0.64	0.24	2.73	150	59	0.00641759	0.039571
	LTR14C	LTR	ERVK	42.77	0.7	0.26	2.72	74	23	0.00647377	0.0398465
	THE1A	LTR	ERVL-MaLR	1813.34	0.28	0.1	2.72	2411	1445	0.00652796	0.0400521
	THE1C	LTR	ERVL-MaLR	3789.22	0.29	0.11	2.72	5054	3034	0.00657239	0.040211
	MLT1H1-int	LTR	ERVL-MaLR	71.48	0.66	0.24	2.72	116	43	0.00658869	0.0402823
	MER57A1	LTR	ERV1	283.55	0.45	0.17	2.71	399	208	0.00674959	0.0410922
	LTR12_	LTR	ERV1	197.72	0.52	0.19	2.71	290	140	0.00681194	0.0413701
	LTR12C	LTR	ERV1	2864.52	0.27	0.1	2.69	3813	2291	0.00714434	0.0429527
	MLT2B4	LTR	ERVL	1258.62	0.3	0.11	2.69	1681	996	0.00714691	0.0429533
	LTR7C	LTR	ERV1	76.82	0.67	0.25	2.69	129	46	0.00725027	0.0433835
	LTR1A2	LTR	ERV1	382.3	0.45	0.17	2.67	549	283	0.00757485	0.0448722
	MLT1C	LTR	ERVL-MaLR	7104.14	0.27	0.1	2.66	9449	5721	0.00785692	0.046139
	MER67A	LTR	ERV1	94.26	0.6	0.23	2.65	145	61	0.00815705	0.0475577
	LTR7Y	LTR	ERV1	58.57	0.67	0.25	2.64	101	34	0.00821969	0.0478104
	MamGypLTR2c	LTR	Gypsy	197.98	0.51	0.19	2.64	293	140	0.00828794	0.0481105
	THE1D	LTR	ERVL-MaLR	4430.44	0.27	0.1	2.63	5880	3568	0.00864497	0.0497997
	AluYa5	SINE	Alu	1210.36	0.6	0.12	4.85	1785	847	1.22026e-06	2.5655e-05
	AluYj4	SINE	Alu	1188.96	0.51	0.13	3.8	1721	867	0.000147082	0.00176549
	AluYh3	SINE	Alu	740.15	0.54	0.15	3.55	1093	530	0.000383647	0.0039775
	AluYk3	SINE	Alu	326.68	0.62	0.19	3.35	504	222	0.000805966	0.00741737
	AluSq4	SINE	Alu	836.7	0.44	0.14	3.13	1184	628	0.00172188	0.0137438
	AluYk4	SINE	Alu	294.17	0.5	0.17	2.89	429	211	0.00388458	0.0263607
	AluYb8	SINE	Alu	682.48	0.39	0.14	2.77	951	521	0.00560922	0.0355371
	AluSq10	SINE	Alu	693.29	0.36	0.13	2.66	949	536	0.00770057	0.0454117
	TAF15 KD vs Control
	Arthur1	DNA	hAT-Tip100	482.8	0.49	0.12	4.01	730	317	5.9676e-05	0.00215144
	Arthur1B	DNA	hAT-Tip100	638.73	0.39	0.11	3.52	931	442	0.000434409	0.0108634
	Tigger2a	DNA	TcMar-Tigger	1257.57	0.32	0.1	3.2	1782	910	0.00136182	0.0267525
	L1MA5A	LINE	L1	2205.92	0.53	0.09	6.25	3343	1456	4.07272e-10	6.77676e-08
	L1MA4	LINE	L1	6015.67	0.49	0.08	6.2	8966	4066	5.56297e-10	8.91363e-08
	L1MA2	LINE	L1	5784.21	0.52	0.09	6.09	8708	3869	1.13603e-09	1.68025e-07
	L1MA1	LINE	L1	3322.33	0.52	0.09	5.84	5008	2217	5.33125e-09	7.04254e-07
	L1MA8	LINE	L1	5451.05	0.48	0.08	5.82	8104	3705	5.73282e-09	7.50749e-07
	L1MC1	LINE	L1	8315.52	0.45	0.08	5.47	12210	5750	4.51019e-08	4.48556e-06
	L1MA9	LINE	L1	8302.05	0.46	0.08	5.46	12243	5714	4.70854e-08	4.65608e-06
	L1PB4	LINE	L1	4103.12	0.48	0.09	5.43	6109	2789	5.78664e-08	5.53247e-06
	L1MA6	LINE	L1	3265.24	0.47	0.09	5.35	4840	2227	8.79213e-08	8.00778e-06
	L1MEc	LINE	L1	9183.37	0.43	0.08	5.34	13399	6399	9.41693e-08	8.44352e-06
	L1PREC2	LINE	L1	7380.09	0.44	0.08	5.33	10841	5111	9.94388e-08	8.82456e-06
	L1MB1	LINE	L1	2954.28	0.45	0.08	5.31	4346	2031	1.08394e-07	9.57023e-06
	L1MC3	LINE	L1	7288.87	0.42	0.08	5.3	10614	5094	1.13354e-07	9.85722e-06
	L1MCa	LINE	L1	3921.45	0.47	0.09	5.3	5829	2675	1.14202e-07	9.88134e-06
	L1P1	LINE	L1	3586.51	0.49	0.09	5.23	5356	2426	1.68472e-07	1.38171e-05
	L1M2	LINE	L1	4566.45	0.45	0.09	5.14	6721	3148	2.6757e-07	2.12399e-05
	L1PB3	LINE	L1	2254.94	0.52	0.1	5.12	3416	1503	3.12952e-07	2.45052e-05
	L1MA7	LINE	L1	4533.26	0.4	0.08	5.11	6552	3185	3.15466e-07	2.45907e-05
	L1PA17	LINE	L1	2946.54	0.48	0.09	5.1	4387	2007	3.34497e-07	2.57265e-05
	L1MC2	LINE	L1	3502.61	0.42	0.08	5.07	5111	2441	4.00879e-07	3.00312e-05
	L1MB3	LINE	L1	9605.48	0.39	0.08	5.06	13859	6793	4.10206e-07	3.05975e-05
	L1PB2	LINE	L1	2277.73	0.49	0.1	4.91	3409	1538	9.18657e-07	6.30848e-05
	L1MA10	LINE	L1	1587.3	0.52	0.11	4.86	2412	1055	1.14907e-06	7.6775e-05
	L1PBa	LINE	L1	2053.7	0.48	0.1	4.84	3062	1395	1.31699e-06	8.60018e-05
	L1PA14	LINE	L1	2784.3	0.47	0.1	4.83	4144	1900	1.35756e-06	8.73329e-05
	L1MEg	LINE	L1	6996.67	0.38	0.08	4.8	10049	4978	1.56813e-06	9.90382e-05
	L1MEf	LINE	L1	5967.78	0.42	0.09	4.79	8708	4177	1.62929e-06	0.000102155
	L1MCb	LINE	L1	808.71	0.55	0.12	4.78	1243	524	1.75479e-06	0.000109233
	L1MB5	LINE	L1	5240.7	0.38	0.08	4.78	7561	3714	1.7763e-06	0.000110175
	L1ME5	LINE	L1	988.34	0.51	0.11	4.7	1487	654	2.54339e-06	0.000149705
	L1HS	LINE	L1	2242.85	0.45	0.1	4.63	3328	1541	3.6344e-06	0.000203538
	L1MB7	LINE	L1	14685.8	0.32	0.07	4.6	20677	10657	4.14854e-06	0.000229362
	L1ME3A	LINE	L1	6342.88	0.33	0.07	4.56	8965	4587	5.15833e-06	0.000275257
	L1P3	LINE	L1	3025.27	0.41	0.09	4.54	4399	2118	5.56176e-06	0.000290774
	L1P2	LINE	L1	3022.34	0.43	0.09	4.54	4424	2104	5.63789e-06	0.000293867
	L1ME1	LINE	L1	18176.1	0.32	0.07	4.52	25605	13220	6.29603e-06	0.000322345
	L1MB8	LINE	L1	10240.1	0.33	0.07	4.51	14461	7425	6.44092e-06	0.000324957
	L1MDa	LINE	L1	4535.72	0.41	0.09	4.48	6610	3190	7.39229e-06	0.000365496
	L1PA12	LINE	L1	3460.33	0.38	0.08	4.46	4979	2458	8.36291e-06	0.000409972
	L1ME2z	LINE	L1	3009.36	0.37	0.08	4.44	4322	2139	9.20595e-06	0.000444997
	L1M4	LINE	L1	10868.6	0.31	0.07	4.41	15281	7922	1.03504e-05	0.000490724
	L1MC4	LINE	L1	13074.7	0.31	0.07	4.4	18321	9552	1.07616e-05	0.000507436
	L1MEd	LINE	L1	10574.7	0.33	0.08	4.37	14972	7666	1.26493e-05	0.000579093
	L1M4b	LINE	L1	2507.18	0.39	0.09	4.34	3632	1770	1.39949e-05	0.000633983
	L1MEh	LINE	L1	831.41	0.46	0.11	4.34	1235	561	1.44418e-05	0.00065252
	L1MC4a	LINE	L1	5384.64	0.32	0.07	4.29	7596	3909	1.74924e-05	0.00076829
	L1MA5	LINE	L1	3267.97	0.34	0.08	4.24	4642	2353	2.20466e-05	0.00094435
	L1M4a1	LINE	L1	1367.04	0.39	0.09	4.24	1978	958	2.23645e-05	0.000953244
	HAL1	LINE	L1	13187.7	0.32	0.07	4.23	18550	9617	2.31892e-05	0.000978014
	L1MB4	LINE	L1	4933.79	0.32	0.08	4.22	6969	3579	2.42945e-05	0.00101796
	L1PB	LINE	L1	884.31	0.45	0.11	4.2	1309	602	2.66966e-05	0.00110259
	L1M4c	LINE	L1	2195.84	0.37	0.09	4.14	3153	1563	3.43031e-05	0.00136463
	L1MB2	LINE	L1	5101.84	0.33	0.08	4.12	7233	3697	3.73554e-05	0.00145922
	L1M5	LINE	L1	20026.7	0.27	0.07	4.11	27793	14813	3.96121e-05	0.00152584
	L1ME3	LINE	L1	3946.7	0.34	0.08	4.1	5611	2848	4.05454e-05	0.00155574
	L1MEi	LINE	L1	2014.33	0.37	0.09	4.1	2901	1431	4.18428e-05	0.00158792
	L1ME2	LINE	L1	6371.79	0.3	0.07	4.08	8945	4659	4.58332e-05	0.00171305
	L1MC5a	LINE	L1	7595.62	0.27	0.07	4.07	10523	5607	4.62757e-05	0.00172215
	L1MD1	LINE	L1	5013.34	0.32	0.08	4.03	7078	3642	5.53171e-05	0.00200684
	L1MCc	LINE	L1	1216.6	0.41	0.1	3.98	1779	845	6.87803e-05	0.00239961
	L1M4a2	LINE	L1	1035.86	0.38	0.1	3.86	1499	727	0.00011138	0.00350031
	L1ME3Cz	LINE	L1	4730.24	0.3	0.08	3.78	6642	3466	0.000153827	0.00455039
	L1ME3G	LINE	L1	5966.47	0.27	0.07	3.78	8290	4410	0.000157952	0.00466444
	L2c	LINE	L2	58024.5	0.3	0.08	3.77	81338	42713	0.00016541	0.00485157
	L1MD2	LINE	L1	7112.58	0.27	0.07	3.76	9862	5270	0.000170063	0.00497118
	L1M3	LINE	L1	2559.05	0.34	0.09	3.71	3638	1848	0.000208532	0.00592552
	L1MC	LINE	L1	2588.46	0.33	0.09	3.68	3668	1876	0.00022981	0.00642467
	L1MD3	LINE	L1	2933.27	0.3	0.08	3.68	4110	2146	0.000232878	0.00645827
	L1M7	LINE	L1	1280.08	0.39	0.11	3.67	1866	902	0.000241131	0.00655066
	L1MC5	LINE	L1	6113.31	0.29	0.08	3.67	8553	4499	0.000243465	0.00660369
	L1M3b	LINE	L1	181.88	0.54	0.15	3.56	294	110	0.000374842	0.0095603
	L1P4	LINE	L1	1505.61	0.35	0.1	3.46	2159	1080	0.000532351	0.0126892
	L1M6	LINE	L1	2490.89	0.27	0.08	3.43	3454	1836	0.000610941	0.0141531
	HAL1b	LINE	L1	1705.11	0.35	0.1	3.42	2441	1226	0.000637246	0.014723
	L1ME4b	LINE	L1	8404.85	0.24	0.07	3.36	11525	6310	0.000781845	0.0171489
	L1ME3C	LINE	L1	1228.55	0.33	0.1	3.36	1748	885	0.00078057	0.0171489
	L1ME4a	LINE	L1	10846.3	0.22	0.07	3.35	14804	8173	0.000812341	0.0176825
	L1M3f	LINE	L1	609.5	0.4	0.12	3.34	902	422	0.000849307	0.0183716
	L1ME3F	LINE	L1	2315.01	0.27	0.08	3.29	3208	1710	0.00099088	0.0209367
	L1MEb	LINE	L1	723.23	0.36	0.11	3.25	1045	510	0.00115376	0.0237218
	L1M6B	LINE	L1	1066.23	0.31	0.09	3.23	1502	768	0.00121746	0.0247861
	L1M8	LINE	L1	837.96	0.37	0.12	3.18	1219	594	0.00146944	0.0283169
	L1ME3E	LINE	L1	2278.17	0.27	0.09	3.15	3171	1686	0.00164139	0.0309077
	L2-3_Crp	LINE	L2	628.72	0.39	0.13	3.13	928	439	0.00171994	0.0320728
	HAL1M8	LINE	L1	1274.96	0.3	0.1	3.1	1797	930	0.00192492	0.0350899
	L1PB1	LINE	L1	12896	0.43	0.14	3.03	19465	8594	0.00244261	0.0420591
	L1PA6	LINE	L1	11076.1	0.44	0.15	3	16848	7315	0.00272757	0.0456486
	L1MA3	LINE	L1	7625.51	0.41	0.14	2.98	11360	5183	0.00291985	0.0478979
	L1M1	LINE	L1	6205.54	0.42	0.14	2.97	9277	4194	0.00293767	0.048095
	L1ME3D	LINE	L1	2084.86	0.26	0.09	2.97	2895	1549	0.00297681	0.0485978
	ERV3-16A3_I-int	LTR	ERVL	2156.64	0.53	0.1	5.57	3263	1430	2.57732e-08	2.71954e-06
	LTR7B	LTR	ERV1	305.48	0.65	0.14	4.62	495	180	3.87106e-06	0.000214708
	MLT2B1	LTR	ERVL	1123.32	0.45	0.1	4.51	1662	764	6.43931e-06	0.000324957
	LTR85a	LTR	Gypsy	366.8	0.6	0.13	4.45	581	226	8.54945e-06	0.000417933
	HERVH48-int	LTR	ERV1	64.04	0.7	0.16	4.37	126	24	1.21533e-05	0.00056384
	MER31A	LTR	ERV1	419.55	0.6	0.14	4.37	671	258	1.22087e-05	0.000564898
	HERV9-int	LTR	ERV1	357.57	0.57	0.13	4.24	563	223	2.23024e-05	0.000952945
	LTR8B	LTR	ERV1	467.08	0.52	0.13	4.11	719	302	3.92466e-05	0.00151938
	MER4-int	LTR	ERV1	867.27	0.43	0.1	4.08	1278	595	4.43972e-05	0.00166297
	MLT2B3	LTR	ERVL	1378.08	0.41	0.1	4.06	2007	960	4.9058e-05	0.00180149
	MER4D	LTR	ERV1	379.15	0.55	0.14	3.97	598	239	7.31938e-05	0.00252818
	MLT1K	LTR	ERVL-MaLR	3957.47	0.37	0.09	3.95	5686	2831	7.71976e-05	0.00261429
	MLT2A2	LTR	ERVL	1325.27	0.37	0.1	3.89	1911	937	0.0001011	0.00326406
	LTR85c	LTR	Gypsy	214.14	0.57	0.15	3.87	344	128	0.000109668	0.00345683
	LTR33	LTR	ERVL	2635.98	0.38	0.1	3.85	3820	1874	0.000120238	0.00374905
	MER41A	LTR	ERV1	872.36	0.4	0.11	3.8	1272	606	0.00014682	0.00438056
	MamGypLTR2b	LTR	Gypsy	119.4	0.61	0.16	3.76	204	65	0.000168842	0.00494384
	LTR78	LTR	ERV1	1500.86	0.38	0.1	3.72	2173	1063	0.000198282	0.00568066
	MER57A1	LTR	ERV1	322.42	0.5	0.14	3.68	497	208	0.000235734	0.0065062
	MLT2D	LTR	ERVL	1051.17	0.38	0.1	3.67	1519	740	0.000238154	0.00651129
	LTR7	LTR	ERV1	448.61	0.49	0.13	3.67	683	294	0.000238174	0.00651129
	MLT1A	LTR	ERVL-MaLR	3098.02	0.32	0.09	3.66	4370	2256	0.000254794	0.00687864
	ERVL-B4-int	LTR	ERVL	1911.18	0.37	0.1	3.63	2753	1363	0.000285938	0.00753145
	THE1D	LTR	ERVL-MaLR	4880.1	0.31	0.09	3.62	6896	3568	0.000294701	0.00771527
	HERV17-int	LTR	ERV1	413.22	0.49	0.13	3.61	634	272	0.000309494	0.00806595
	MSTD	LTR	ERVL-MaLR	2638.99	0.31	0.09	3.58	3714	1924	0.000341185	0.00879911
	MLT1D	LTR	ERVL-MaLR	9909.53	0.29	0.08	3.57	13818	7325	0.000356402	0.00913708
	MER92D	LTR	ERV1	25.76	0.5	0.14	3.55	54	7	0.000385422	0.00980843
	LTR50	LTR	ERVL	691.67	0.41	0.12	3.54	1019	477	0.000394162	0.00995764
	MER21C	LTR	ERVL	3571.68	0.32	0.09	3.51	5055	2603	0.000444722	0.0110205
	MLT1J	LTR	ERVL-MaLR	3956.19	0.31	0.09	3.49	5579	2894	0.000482802	0.0118007
	MER49	LTR	ERV1	991.76	0.34	0.1	3.48	1412	704	0.000498283	0.012043
	HERV16-int	LTR	ERVL	455.89	0.48	0.14	3.48	698	300	0.000506953	0.0122184
	HERVIP10F-int	LTR	ERV1	337.65	0.46	0.13	3.47	511	222	0.000524567	0.0125376
	MER65A	LTR	ERV1	487.24	0.44	0.13	3.45	729	330	0.000551414	0.013074
	MLT2C1	LTR	ERVL	461.76	0.45	0.13	3.45	697	311	0.000552601	0.013074
	THE1A	LTR	ERVL-MaLR	1981.86	0.31	0.09	3.44	2792	1445	0.000580981	0.0136416
	HERVL-int	LTR	ERVL	2644.43	0.3	0.09	3.44	3711	1937	0.000591629	0.0138166
	MLT2A1	LTR	ERVL	1037.83	0.34	0.1	3.41	1482	742	0.000658405	0.0150876
	LOR1b	LTR	ERV1	274.66	0.47	0.14	3.36	421	178	0.000777121	0.0171095
	LTR16C	LTR	ERVL	1799.62	0.35	0.1	3.35	2587	1295	0.000793717	0.0173206
	MLT1C	LTR	ERVL-MaLR	7726.43	0.29	0.09	3.32	10795	5721	0.000886572	0.0190585
	MER52-int	LTR	ERV1	110.03	0.54	0.16	3.32	187	62	0.000900985	0.0193204
	MLT1A0	LTR	ERVL-MaLR	7229.89	0.28	0.08	3.31	10053	5372	0.000945466	0.0201246
	LTR103b_Mam	LTR	ERV1	162	0.52	0.16	3.29	261	98	0.0010038	0.021125
	LTR16A	LTR	ERVL	1093.96	0.35	0.11	3.28	1577	782	0.001027	0.021516
	MER39	LTR	ERV1	813.45	0.38	0.12	3.27	1183	573	0.00106975	0.0222569
	LOR1-int	LTR	ERV1	514.23	0.39	0.12	3.27	754	355	0.0010795	0.022399
	LTR16A1	LTR	ERVL	631.49	0.38	0.12	3.26	920	442	0.0010995	0.0227323
	MLT1L	LTR	ERVL-MaLR	3241.03	0.29	0.09	3.23	4543	2391	0.0012481	0.0252983
	MER4B	LTR	ERV1	681.66	0.38	0.12	3.22	1000	478	0.00129781	0.0260347
	MLT2B4	LTR	ERVL	1371.02	0.31	0.1	3.21	1932	996	0.00131968	0.0262495
	MER31B	LTR	ERV1	506.9	0.42	0.13	3.21	756	347	0.00134023	0.0265971
	ERVL-E-int	LTR	ERVL	3802.56	0.27	0.09	3.2	5300	2822	0.00136104	0.0267525
	THE1C	LTR	ERVL-MaLR	4115.1	0.3	0.09	3.19	5788	3034	0.0014464	0.028029
	MER50	LTR	ERV1	739.62	0.36	0.11	3.14	1068	525	0.00166948	0.0313005
	LTR12_	LTR	ERV1	217.2	0.47	0.15	3.13	337	140	0.00176725	0.0326733
	MamGypLTR1a	LTR	Gypsy	190.75	0.48	0.16	3.1	300	120	0.00192635	0.0350899
	ERV3-16A3_LTR	LTR	ERVL	175.42	0.48	0.16	3.07	280	110	0.00217566	0.0386547
	LTR12C	LTR	ERV1	3070.23	0.25	0.08	3.06	4237	2291	0.00220509	0.0390574
	MLT1J-int	LTR	ERVL-MaLR	330.4	0.41	0.13	3.06	492	223	0.00221467	0.0390774
	MER34A	LTR	ERV1	337.31	0.41	0.13	3.05	501	228	0.00227305	0.0398129
	MLT1H1	LTR	ERVL-MaLR	1026.98	0.32	0.1	3.05	1454	741	0.00229079	0.0400022
	LTR81C	LTR	Gypsy	110.9	0.5	0.16	3.04	182	65	0.00237124	0.0410342
	LTR16E1	LTR	ERVL	600.69	0.38	0.13	3.03	880	421	0.00248055	0.0425431
	LTR29	LTR	ERV1	206.8	0.46	0.15	3.02	318	131	0.00256814	0.0435001
	MLT1J1	LTR	ERVL-MaLR	958.3	0.32	0.11	2.98	1364	694	0.00285095	0.047121
	MamGypLTR1b	LTR	Gypsy	210.46	0.46	0.15	2.98	328	136	0.00292287	0.0478979
	LTR39	LTR	ERV1	361.22	0.38	0.13	2.97	531	247	0.00297673	0.0485978
	AluYa5	SINE	Alu	1275.83	0.52	0.1	5.02	1929	847	5.16316e-07	3.72285e-05
	AluYj4	SINE	Alu	1297.8	0.5	0.11	4.43	1950	867	9.49881e-06	0.000457874
	SVA_D	Retroposon	SVA	1873.97	0.271037	0.0980277	2.7649	2613	1392.5	0.000341185	0.00879911
	FUS KD vs Control
	FordPrefect	DNA	hAT-Tip100	4273.71	-0.59	0.1	-6.13	4419	4121	8.53965e-10	5.02011e-08
	Arthur1	DNA	hAT-Tip100	495.28	0.49	0.13	3.74	774	317	0.000183431	0.00313593
	Arthur1B	DNA	hAT-Tip100	654.84	0.37	0.12	3.13	982	442	0.00174975	0.0194257
	MER53	DNA	hAT	1028.5	0.32	0.11	2.98	1511	712	0.00285484	0.0282297
	Ricksha	DNA	MULE-MuDR	85.78	0.58	0.2	2.95	148	46	0.0032288	0.0310002
	L1MA5A	LINE	L1	2312.82	0.56	0.09	5.96	3656	1456	2.50457e-09	1.37579e-07
	L1MA8	LINE	L1	5641.66	0.47	0.09	5.15	8692	3705	2.64286e-07	1.01092e-05
	L1MA4	LINE	L1	6155.63	0.46	0.09	4.94	9434	4066	7.79251e-07	2.69121e-05
	L1MA1	LINE	L1	3411.52	0.5	0.1	4.92	5304	2217	8.56441e-07	2.91051e-05
	L1MCb	LINE	L1	856.89	0.61	0.13	4.85	1391	524	1.21323e-06	3.98557e-05
	L1MA2	LINE	L1	5891.13	0.48	0.1	4.84	9090	3869	1.30339e-06	4.25672e-05
	L1M2	LINE	L1	4819.78	0.49	0.1	4.83	7467	3148	1.33564e-06	4.3347e-05
	L1MB1	LINE	L1	3051.29	0.44	0.09	4.66	4649	2031	3.17291e-06	9.30981e-05
	L1MC1	LINE	L1	8580.31	0.43	0.09	4.65	13033	5750	3.33422e-06	9.766e-05
	L1MEc	LINE	L1	9574.74	0.43	0.09	4.64	14565	6399	3.49356e-06	0.000101894
	L1MA6	LINE	L1	3359.06	0.45	0.1	4.63	5144	2227	3.64421e-06	0.000105632
	L1MA9	LINE	L1	8511.52	0.43	0.09	4.61	12925	5714	4.09012e-06	0.000117138
	L1PB4	LINE	L1	4220.44	0.46	0.1	4.59	6489	2789	4.52988e-06	0.000127767
	L1ME5	LINE	L1	1023.97	0.51	0.11	4.48	1607	654	7.29635e-06	0.000196217
	L1MCa	LINE	L1	4073.83	0.47	0.11	4.43	6293	2675	9.23926e-06	0.000241866
	L1MC3	LINE	L1	7486.62	0.39	0.09	4.41	11228	5094	1.04923e-05	0.000272541
	L1MC2	LINE	L1	3606.98	0.4	0.09	4.37	5429	2441	1.22903e-05	0.00031389
	L1MA10	LINE	L1	1623.65	0.5	0.11	4.36	2537	1055	1.28449e-05	0.000325572
	L1MA7	LINE	L1	4678.22	0.38	0.09	4.33	6998	3185	1.4675e-05	0.000365327
	L1MEi	LINE	L1	2157.31	0.44	0.1	4.31	3299	1431	1.66101e-05	0.000406535
	L1MEh	LINE	L1	867.82	0.48	0.11	4.19	1348	561	2.84244e-05	0.000647042
	L1M4b	LINE	L1	2644.26	0.42	0.1	4.15	4021	1770	3.27786e-05	0.000734188
	L1PB	LINE	L1	949.65	0.52	0.13	4.15	1498	602	3.34194e-05	0.000745428
	L1ME1	LINE	L1	18940.7	0.32	0.08	3.91	27781	13220	9.18403e-05	0.0017505
	L1M4a1	LINE	L1	1434.67	0.41	0.11	3.86	2173	958	0.000114682	0.00213013
	L1MB8	LINE	L1	10596.4	0.31	0.08	3.85	15490	7425	0.000117107	0.00216797
	L1MEg	LINE	L1	7239.25	0.36	0.09	3.85	10767	4978	0.000119131	0.00220301
	L1MB5	LINE	L1	5385.14	0.35	0.09	3.82	7992	3714	0.000134114	0.00244766
	L1MC5a	LINE	L1	7968.4	0.29	0.08	3.82	11556	5607	0.00013474	0.00245373
	L1MB3	LINE	L1	9745.79	0.33	0.09	3.81	14343	6793	0.000141008	0.00254575
	L1ME2z	LINE	L1	3085.22	0.34	0.09	3.75	4557	2139	0.000180297	0.00310133
	L1MB4	LINE	L1	5117.66	0.32	0.08	3.74	7494	3579	0.000182303	0.00312942
	L1MB2	LINE	L1	5298.83	0.33	0.09	3.74	7788	3697	0.00018212	0.00312942
	L1MCc	LINE	L1	1274.55	0.44	0.12	3.7	1955	845	0.000214898	0.00354719
	L1M4c	LINE	L1	2312.3	0.39	0.11	3.68	3486	1563	0.000236398	0.00384525
	L1ME3A	LINE	L1	6512.39	0.29	0.08	3.66	9467	4587	0.000249121	0.00399507
	L1MEd	LINE	L1	10966.4	0.32	0.09	3.61	16093	7666	0.000311237	0.00478665
	L1M5	LINE	L1	20813.7	0.27	0.08	3.53	29982	14813	0.000408574	0.00604171
	L1M4	LINE	L1	11288.9	0.3	0.09	3.51	16474	7922	0.000446343	0.00648572
	L1MB7	LINE	L1	15040	0.28	0.08	3.51	21770	10657	0.000451109	0.00653796
	L1MD3	LINE	L1	3065.7	0.31	0.09	3.5	4484	2146	0.000471168	0.00676431
	L1P4e	LINE	L1	183.92	0.6	0.17	3.48	307	107	0.000495061	0.00702902
	L1MA5	LINE	L1	3369.31	0.32	0.09	3.45	4939	2353	0.000565177	0.00785495
	L1P4	LINE	L1	1598.28	0.4	0.12	3.41	2420	1080	0.00065408	0.00877208
	L1MD1	LINE	L1	5205.23	0.32	0.09	3.39	7636	3642	0.000710636	0.00938219
	HAL1	LINE	L1	13686.8	0.31	0.09	3.38	19998	9617	0.000720582	0.00946873
	L1ME2	LINE	L1	6569.05	0.28	0.08	3.37	9510	4659	0.000756861	0.00988343
	L1ME3Cz	LINE	L1	4901.38	0.29	0.09	3.34	7125	3466	0.000849009	0.0108561
	L1MC4	LINE	L1	13425.8	0.27	0.08	3.29	19365	9552	0.00099983	0.0123899
	L1M8	LINE	L1	880.4	0.41	0.12	3.25	1339	594	0.0011347	0.0137262
	L1MC4a	LINE	L1	5506.87	0.28	0.09	3.21	7963	3909	0.00130642	0.0154357
	L2a	LINE	L2	73681.2	0.31	0.1	3.21	107715	52131	0.00133724	0.0157222
	L1ME3	LINE	L1	4005.39	0.28	0.09	3.12	5802	2848	0.00180627	0.0199225
	L1M6	LINE	L1	2603.45	0.28	0.09	3.12	3771	1836	0.00182943	0.0200934
	L1MC	LINE	L1	2665.82	0.31	0.1	3.06	3901	1876	0.00218671	0.0231142
	HAL1b	LINE	L1	1762.06	0.34	0.11	3.05	2613	1226	0.00231258	0.0241252
	L1M7	LINE	L1	1310.57	0.36	0.12	3.02	1962	902	0.00251134	0.0255931
	L1MDb	LINE	L1	329.46	0.48	0.16	3.02	523	211	0.002515	0.0256148
	HAL1M8	LINE	L1	1336.13	0.32	0.11	2.99	1967	930	0.00275581	0.02745
	L1M3	LINE	L1	2624.97	0.31	0.1	2.94	3843	1848	0.00324646	0.0311051
	L1MEb	LINE	L1	745.17	0.35	0.12	2.91	1114	510	0.00356851	0.0335034
	L1M3b	LINE	L1	181.95	0.52	0.18	2.89	298	110	0.00381254	0.0352468
	L1MC5	LINE	L1	6258.81	0.25	0.09	2.85	8990	4499	0.00437477	0.0391114
	L1ME4b	LINE	L1	8714.65	0.22	0.08	2.84	12376	6310	0.00453763	0.0402041
	L1ME3G	LINE	L1	6105.47	0.23	0.08	2.79	8693	4410	0.00534454	0.0456383
	L1MD2	LINE	L1	7289.17	0.23	0.08	2.78	10370	5270	0.00546286	0.0463674
	L1M2a	LINE	L1	334.64	0.43	0.16	2.78	521	219	0.00547161	0.0463689
	L1M3f	LINE	L1	627.04	0.39	0.14	2.75	955	422	0.00590972	0.0490155
	LTR7B	LTR	ERV1	327.59	0.77	0.15	5.04	564	180	4.73766e-07	1.72554e-05
	ERV3-16A3_I-int	LTR	ERVL	2224.33	0.52	0.11	4.91	3486	1430	9.23599e-07	3.11411e-05
	LTR8B	LTR	ERV1	492.94	0.59	0.14	4.31	799	302	1.65522e-05	0.000406535
	HERVH48-int	LTR	ERV1	62.47	0.84	0.21	4.1	127	24	4.11353e-05	0.000892721
	LTR85a	LTR	Gypsy	374.26	0.6	0.15	3.99	612	226	6.64948e-05	0.00133101
	LTR7	LTR	ERV1	479.79	0.57	0.15	3.81	779	294	0.000139588	0.00252554
	HERV16-int	LTR	ERVL	486.88	0.58	0.15	3.8	793	300	0.000144588	0.0025936
	MER65A	LTR	ERV1	516.66	0.5	0.14	3.62	816	330	0.000298202	0.00462599
	MLT1J-int	LTR	ERVL-MaLR	353.7	0.5	0.14	3.46	559	223	0.00054042	0.00758944
	MLT2D	LTR	ERVL	1085.79	0.37	0.11	3.44	1627	740	0.000591067	0.00811789
	LTR60B	LTR	ERV1	90.14	0.69	0.2	3.39	166	45	0.000692822	0.00917593
	LTR29	LTR	ERV1	218.45	0.56	0.17	3.38	357	131	0.000718522	0.00944908
	MamGypLTR1a	LTR	Gypsy	202.36	0.59	0.18	3.37	338	120	0.000741686	0.00973078
	MER4D	LTR	ERV1	378.95	0.52	0.16	3.34	607	239	0.000828965	0.0106588
	MER41A	LTR	ERV1	908.25	0.41	0.12	3.29	1382	606	0.000995063	0.0123508
	ERVL-B4-int	LTR	ERVL	1980.68	0.37	0.11	3.28	2964	1363	0.00103495	0.0127122
	LTR78	LTR	ERV1	1544.39	0.36	0.11	3.25	2307	1063	0.00115413	0.013901
	MER52-int	LTR	ERV1	115.7	0.64	0.2	3.25	206	62	0.0011576	0.0139228
	HERVFH21-int	LTR	ERV1	51.05	0.66	0.2	3.24	100	22	0.00119582	0.0143106
	MER31A	LTR	ERV1	410.07	0.52	0.16	3.21	659	258	0.00135037	0.0158542
	MER4-int	LTR	ERV1	872.5	0.36	0.11	3.2	1304	595	0.00136848	0.0159788
	MER31B	LTR	ERV1	535.45	0.47	0.15	3.16	842	347	0.00157113	0.017858
	LTR103b_Mam	LTR	ERV1	165.29	0.56	0.18	3.12	275	98	0.00182566	0.0200703
	LTR85c	LTR	Gypsy	208.39	0.52	0.17	3.1	336	128	0.00194161	0.0211369
	MLT1K	LTR	ERVL-MaLR	4027.42	0.32	0.11	3.03	5924	2831	0.00244456	0.0250898
	MLT1J1	LTR	ERVL-MaLR	1010.42	0.35	0.12	3.01	1509	694	0.00263798	0.0265765
	LTR26C	LTR	ERV1	50.13	0.61	0.21	3	93	23	0.00273138	0.0272671
	MER34A	LTR	ERV1	349.57	0.43	0.15	2.99	541	228	0.00275751	0.0274506
	MLT1O	LTR	ERVL-MaLR	1149.9	0.32	0.11	2.96	1697	800	0.00306301	0.029888
	MER57-int	LTR	ERV1	793.55	0.33	0.11	2.96	1170	545	0.00310554	0.0301275
	MER4A1	LTR	ERV1	748.52	0.35	0.12	2.96	1116	511	0.00310521	0.0301275
	MamGypLTR1b	LTR	Gypsy	219.77	0.52	0.18	2.95	358	136	0.00316263	0.0305928
	MLT2B3	LTR	ERVL	1370.6	0.31	0.11	2.94	2013	960	0.00325263	0.0311397
	MER57B2	LTR	ERV1	371.34	0.43	0.15	2.94	574	244	0.00332398	0.03175
	LOR1-int	LTR	ERV1	527.67	0.38	0.13	2.92	798	355	0.00352456	0.0332304
	MER39	LTR	ERV1	833.09	0.36	0.12	2.91	1248	573	0.00365413	0.0340307
	LTR7C	LTR	ERV1	85.46	0.59	0.2	2.9	152	46	0.00377996	0.0349887
	MLT1H2	LTR	ERVL-MaLR	911.24	0.34	0.12	2.89	1353	631	0.00384614	0.0354836
	MER34-int	LTR	ERV1	194.19	0.5	0.17	2.89	313	121	0.00386642	0.0356315
	HERV9N-int	LTR	ERV1	136.26	0.55	0.19	2.89	229	80	0.00389745	0.035878
	MLT2B1	LTR	ERVL	1093.35	0.31	0.11	2.87	1605	764	0.0040725	0.037102
	MER41B	LTR	ERV1	836.82	0.39	0.13	2.87	1269	571	0.00410842	0.037348
	MER31-int	LTR	ERV1	296.6	0.45	0.16	2.87	464	192	0.00415106	0.037654
	MLT1I-int	LTR	ERVL-MaLR	251.7	0.45	0.16	2.82	393	162	0.00480184	0.0420324
	MLT2A2	LTR	ERVL	1326.65	0.29	0.1	2.81	1931	937	0.00492852	0.0428948
	MER4B	LTR	ERV1	698.77	0.37	0.13	2.79	1052	478	0.00525003	0.0449918
	LTR22A	LTR	ERVK	52.44	0.57	0.2	2.78	97	26	0.00537128	0.0457966
	MER83	LTR	ERV1	253.74	0.45	0.16	2.78	397	163	0.00538606	0.0458993
	LOR1b	LTR	ERV1	274.31	0.43	0.15	2.78	426	178	0.00548355	0.0464466
	MER67C	LTR	ERV1	630.43	0.33	0.12	2.77	931	431	0.00555294	0.0468816
	MER4CL34	LTR	ERV1	282.54	0.44	0.16	2.77	441	182	0.00556617	0.0469565
	MSTD	LTR	ERVL-MaLR	2682.88	0.26	0.09	2.76	3858	1924	0.00569785	0.0476594
	LTR39	LTR	ERV1	373.53	0.39	0.14	2.76	569	247	0.00584165	0.0486073
	MER67D	LTR	ERV1	174.54	0.5	0.18	2.75	283	108	0.00587326	0.0487373
	LTR16E1	LTR	ERVL	618.52	0.38	0.14	2.75	937	421	0.00593639	0.0492124
	MLT2F	LTR	ERVL	718.19	0.33	0.12	2.75	1064	497	0.00595197	0.0492768
	ERV3-16A3_LTR	LTR	ERVL	179.88	0.51	0.19	2.74	296	110	0.00605277	0.0499794
	AluYh3	SINE	Alu	794.33	0.42	0.14	2.93	1221	530	0.00335083	0.0319158
	AluYj4	SINE	Alu	1265.56	0.37	0.13	2.9	1903	867	0.00374843	0.0347544
	AluYk3	SINE	Alu	345.28	0.47	0.17	2.81	548	222	0.00493374	0.0429179
	TAF15+FUS KD vs Control
	FordPrefect	DNA	hAT-Tip100	3151.07	-0.97	0.1	-9.48	2338	4121	2.5588e-21	4.40766e-19
	Arthur1	DNA	hAT-Tip100	484.01	0.9	0.14	6.49	711	317	8.39403e-11	3.89285e-09
	MER53	DNA	hAT	953.21	0.63	0.11	5.73	1273	712	9.96157e-09	3.29728e-07
	HSMAR2	DNA	TcMar-Mariner	1317.11	0.6	0.11	5.43	1771	1011	5.65165e-08	1.65635e-06
	MER5A1	DNA	hAT-Charlie	5030.53	0.43	0.08	5.2	6349	4143	2.01412e-07	5.32086e-06
	Arthur1B	DNA	hAT-Tip100	598.98	0.65	0.13	5.14	818	442	2.77605e-07	7.10038e-06
	MER115	DNA	hAT-Tip100	940.08	0.64	0.13	5.12	1270	707	2.99574e-07	7.61613e-06
	MER5B	DNA	hAT-Charlie	7259.81	0.42	0.08	5.05	9163	6030	4.44429e-07	1.08416e-05
	Tigger3b	DNA	TcMar-Tigger	3361.31	0.49	0.1	5.03	4370	2717	4.79837e-07	1.15222e-05
	MER63A	DNA	hAT-Blackjack	1218.78	0.56	0.11	5.01	1625	950	5.40388e-07	1.26875e-05
	Charlie7	DNA	hAT-Charlie	1206.37	0.5	0.1	4.95	1572	957	7.42619e-07	1.6782e-05
	Tigger2a	DNA	TcMar-Tigger	1156.44	0.54	0.11	4.81	1517	910	1.50482e-06	3.19131e-05
	MER58B	DNA	hAT-Charlie	2960.14	0.4	0.09	4.7	3706	2459	2.55885e-06	5.14851e-05
	Zaphod	DNA	hAT-Tip100	491.21	0.64	0.14	4.7	671	364	2.65021e-06	5.31964e-05
	MER2	DNA	TcMar-Tigger	4640.22	0.37	0.08	4.67	5751	3905	3.01036e-06	5.95058e-05
	MER45A	DNA	hAT-Tip100	790.14	0.55	0.12	4.62	1043	614	3.87507e-06	7.41197e-05
	Charlie2b	DNA	hAT-Charlie	1158.54	0.5	0.11	4.58	1506	926	4.58806e-06	8.57708e-05
	Charlie4a	DNA	hAT-Charlie	1068.52	0.49	0.11	4.54	1386	853	5.69355e-06	0.000103347
	MER96B	DNA	hAT-Tip100	365.89	0.69	0.15	4.54	504	263	5.68804e-06	0.000103347
	Charlie16a	DNA	hAT-Charlie	599.57	0.58	0.13	4.53	802	458	5.76962e-06	0.000104391
	Ricksha_c	DNA	MULE-MuDR	318.22	0.74	0.16	4.53	447	223	5.81773e-06	0.000105149
	Tigger1	DNA	TcMar-Tigger	18086.9	0.33	0.07	4.5	22124	15518	6.73042e-06	0.00011922
	MADE1	DNA	TcMar-Mariner	957.45	0.48	0.11	4.46	1228	763	8.32977e-06	0.00014422
	MER20	DNA	hAT-Charlie	7243.47	0.37	0.08	4.41	9014	6130	1.0362e-05	0.000174224
	MER58A	DNA	hAT-Charlie	5172.39	0.36	0.08	4.4	6395	4388	1.08227e-05	0.000180531
	MER102b	DNA	hAT-Charlie	1839.76	0.42	0.1	4.4	2332	1520	1.09812e-05	0.000182995
	MamRep38	DNA	hAT	650.12	0.56	0.13	4.39	858	502	1.11078e-05	0.000184558
	MER45B	DNA	hAT-Tip100	226.73	0.84	0.19	4.39	341	150	1.14557e-05	0.000189965
	MER113	DNA	hAT-Charlie	1136.34	0.48	0.11	4.37	1460	916	1.23497e-05	0.000203192
	MamTip2	DNA	hAT-Tip100	1727.72	0.42	0.1	4.34	2191	1428	1.41291e-05	0.000229782
	MamTip3	DNA	hAT-Tip100	296.91	0.7	0.16	4.31	414	211	1.62424e-05	0.00026014
	MER63B	DNA	hAT-Blackjack	561.07	0.59	0.14	4.29	759	429	1.77573e-05	0.000282261
	Tigger4	DNA	TcMar-Tigger	1180.1	0.43	0.1	4.23	1507	964	2.3074e-05	0.000353781
	MER5A	DNA	hAT-Charlie	11800.9	0.34	0.08	4.23	14550	10121	2.33518e-05	0.00035739
	MER20B	DNA	hAT-Charlie	1404.05	0.47	0.11	4.17	1810	1143	3.08451e-05	0.000458417
	MER81	DNA	hAT-Blackjack	740.01	0.48	0.12	4.06	954	591	4.94205e-05	0.000694066
	MER6	DNA	TcMar-Tigger	458.07	0.56	0.14	4.01	604	350	5.9773e-05	0.000819016
	MER3	DNA	hAT-Charlie	4108.12	0.31	0.08	4	5004	3536	6.22476e-05	0.000850163
	Tigger3a	DNA	TcMar-Tigger	3131.14	0.34	0.09	3.94	3838	2674	8.17329e-05	0.0010813
	MER33	DNA	hAT-Charlie	2885.48	0.32	0.08	3.94	3553	2470	8.2025e-05	0.00108231
	Charlie29a	DNA	hAT-Charlie	618.96	0.49	0.12	3.93	798	488	8.40669e-05	0.00110611
	MER30	DNA	hAT-Charlie	1755.07	0.4	0.1	3.9	2197	1467	9.68924e-05	0.00125241
	Tigger2	DNA	TcMar-Tigger	2769.95	0.38	0.1	3.9	3448	2335	9.80231e-05	0.00126219
	MER91A	DNA	hAT-Tip100	925.14	0.44	0.11	3.88	1185	756	0.000103045	0.0013165
	Tigger6a	DNA	TcMar-Tigger	489.27	0.52	0.14	3.84	646	380	0.000121351	0.00150848
	MER44B	DNA	TcMar-Tigger	1076.12	0.4	0.11	3.8	1358	891	0.000146243	0.00175336
	MER1A	DNA	hAT-Charlie	2078.76	0.36	0.1	3.77	2579	1762	0.000163967	0.00193129
	MER94	DNA	hAT-Blackjack	1317.5	0.41	0.11	3.75	1674	1097	0.000180066	0.00209345
	Tigger15a	DNA	TcMar-Tigger	2863.99	0.3	0.08	3.73	3472	2464	0.000190936	0.00220163
	Charlie6	DNA	hAT-Charlie	47.87	0.96	0.26	3.69	82	23	0.000226078	0.00253532
	Charlie1a	DNA	hAT-Charlie	4012.51	0.28	0.08	3.56	4864	3497	0.000366444	0.00381378
	MER103C	DNA	hAT-Charlie	3419.66	0.31	0.09	3.51	4173	2962	0.000442746	0.00448888
	MER117	DNA	hAT-Charlie	1603.01	0.34	0.1	3.5	1962	1364	0.000471296	0.00474133
	MER6A	DNA	TcMar-Tigger	628.21	0.44	0.13	3.49	806	511	0.000484024	0.00484053
	Charlie1b	DNA	hAT-Charlie	1020.24	0.39	0.11	3.48	1292	852	0.000500503	0.00498171
	Ricksha	DNA	MULE-MuDR	77.88	0.83	0.24	3.44	119	46	0.000574819	0.00562197
	MER58C	DNA	hAT-Charlie	941.43	0.38	0.11	3.39	1175	788	0.000695498	0.00661448
	Charlie23a	DNA	hAT-Charlie	493.15	0.5	0.15	3.39	634	390	0.000705532	0.00670123
	Tigger17a	DNA	TcMar-Tigger	1599.17	0.34	0.1	3.38	1981	1366	0.00071483	0.00676717
	MER47A	DNA	TcMar-Tigger	1160.52	0.36	0.11	3.35	1445	982	0.000801888	0.00746645
	MER44D	DNA	TcMar-Tigger	288.46	0.55	0.17	3.35	388	221	0.000807938	0.00751864
	MamRep137	DNA	TcMar-Tigger	1066.97	0.38	0.11	3.34	1326	894	0.000835475	0.00771198
	MER102c	DNA	hAT-Charlie	1208.44	0.4	0.12	3.34	1519	1014	0.000835464	0.00771198
	MER112	DNA	hAT-Charlie	1552.89	0.35	0.1	3.33	1934	1324	0.000861595	0.00790038
	MamRep434	DNA	TcMar-Tigger	752.89	0.39	0.12	3.33	955	624	0.000871933	0.00798649
	Tigger19a	DNA	TcMar-Tigger	1621.7	0.33	0.1	3.32	1987	1389	0.000887936	0.00811106
	MER91C	DNA	hAT-Tip100	395.72	0.48	0.15	3.32	514	313	0.000892288	0.00814213
	Charlie1	DNA	hAT-Charlie	1104.13	0.39	0.12	3.32	1384	928	0.000901645	0.00821407
	Zaphod3	DNA	hAT-Tip100	327.99	0.52	0.16	3.32	431	255	0.000912509	0.00829514
	Kanga2_a	DNA	TcMar-Tc2	592.94	0.44	0.13	3.3	763	484	0.000955472	0.00862274
	Charlie9	DNA	hAT-Charlie	338.89	0.52	0.16	3.3	443	264	0.000968582	0.0087064
	MER106B	DNA	hAT-Charlie	259.39	0.58	0.18	3.3	344	195	0.000977743	0.00877008
	Arthur1A	DNA	hAT-Tip100	281.34	0.54	0.17	3.26	376	216	0.00110127	0.0096876
	Charlie2a	DNA	hAT-Charlie	1177.27	0.33	0.1	3.26	1454	1002	0.00110893	0.00974487
	Charlie25	DNA	hAT-Charlie	560.01	0.44	0.14	3.18	713	458	0.00149461	0.0124718
	Tigger18a	DNA	TcMar-Tigger	631.6	0.39	0.13	3.15	786	519	0.00165259	0.0136256
	Charlie21a	DNA	hAT-Charlie	237.54	0.55	0.18	3.15	318	181	0.00165525	0.0136328
	OldhAT1	DNA	hAT-Ac	1263.69	0.35	0.11	3.13	1563	1079	0.00172959	0.0141803
	Tigger4b	DNA	TcMar-Tigger	2295.21	0.27	0.09	3.1	2762	2008	0.00196513	0.0157594
	Tigger19b	DNA	TcMar-Tigger	1866.21	0.28	0.09	3.09	2265	1625	0.0020267	0.0161381
	Charlie4z	DNA	hAT-Charlie	2497.17	0.26	0.08	3.09	2987	2189	0.00203198	0.0161725
	MER96	DNA	hAT-Tip100	327.04	0.5	0.16	3.07	426	258	0.00212687	0.0168089
	Tigger13a	DNA	TcMar-Tigger	1419.6	0.3	0.1	3.07	1748	1224	0.00215876	0.0169972
	MER102a	DNA	hAT-Charlie	1185.33	0.35	0.12	3.06	1470	1010	0.00221067	0.0173473
	BLACKJACK	DNA	hAT-Blackjack	756.38	0.37	0.12	3.06	935	633	0.00223794	0.0175144
	MamTip1	DNA	hAT-Tip100	225.51	0.54	0.18	3.04	300	172	0.00235153	0.0182679
	MER63C	DNA	hAT-Blackjack	354.05	0.46	0.15	3.03	460	283	0.00248136	0.0190905
	Charlie18a	DNA	hAT-Charlie	917.14	0.37	0.12	3.01	1154	776	0.00257374	0.0196861
	MER63D	DNA	hAT-Blackjack	354.68	0.47	0.16	3.01	458	284	0.0025947	0.0198051
	Tigger3c	DNA	TcMar-Tigger	855.67	0.36	0.12	3.01	1067	724	0.00262419	0.0199545
	MER44A	DNA	TcMar-Tigger	1108.53	0.32	0.11	2.98	1366	952	0.00292316	0.0218538
	Charlie24	DNA	hAT-Charlie	500.71	0.42	0.14	2.96	647	412	0.00310609	0.023058
	MER1B	DNA	hAT-Charlie	3382.19	0.27	0.09	2.94	4071	2983	0.0032635	0.0240573
	MER2B	DNA	TcMar-Tigger	595.48	0.38	0.13	2.9	745	498	0.0037676	0.0268812
	Tigger7	DNA	TcMar-Tigger	1532.4	0.3	0.1	2.88	1872	1333	0.00392628	0.0277669
	ORSL-2a	DNA	hAT-Tip100	93.44	0.67	0.23	2.86	138	64	0.00421349	0.0293917
	MER46C	DNA	TcMar-Tigger	1524.03	0.27	0.1	2.84	1839	1331	0.0045252	0.0312306
	MER91B	DNA	hAT-Tip100	395.61	0.44	0.15	2.82	504	323	0.00483875	0.0329632
	Tigger3	DNA	TcMar-Tigger	718.6	0.35	0.13	2.81	897	610	0.00495993	0.0336259
	MamRep4096	DNA	hAT-Tip100	345.69	0.44	0.16	2.8	445	280	0.00506785	0.0342612
	MER44C	DNA	TcMar-Tigger	1043.56	0.3	0.11	2.8	1271	901	0.00513508	0.0345635
	MER106A	DNA	hAT-Charlie	294.26	0.45	0.16	2.78	377	234	0.00537158	0.0358021
	Tigger2b_Pri	DNA	TcMar-Tigger	922.28	0.32	0.12	2.77	1145	792	0.00563503	0.0372036
	MER113A	DNA	hAT-Charlie	503.54	0.39	0.14	2.76	636	420	0.00571577	0.0376025
	Charlie17b	DNA	hAT-Charlie	132.63	0.58	0.21	2.76	182	97	0.00582851	0.0381805
	MamRep1879	DNA	hAT-Tip100	474.97	0.39	0.14	2.75	604	395	0.00603152	0.0392212
	Charlie7a	DNA	hAT-Charlie	380.43	0.43	0.16	2.71	488	312	0.00678045	0.0429657
	MER104	DNA	TcMar-Tc2	718.47	0.32	0.12	2.67	876	612	0.00768817	0.0474184
	UCON132b	DNA	hAT-Tip100	247.72	0.46	0.17	2.66	319	196	0.00782138	0.0481169
	MER47B	DNA	TcMar-Tigger	354.35	0.41	0.15	2.66	447	290	0.00787297	0.048399
	L1MA4	LINE	L1	6081.3	0.91	0.08	10.78	8801	4066	4.25497e-27	1.4084e-24
	L1MA5A	LINE	L1	2225.09	0.95	0.09	10.35	3245	1456	4.00778e-25	1.09122e-22
	L1MA8	LINE	L1	5538.59	0.91	0.09	10.34	8028	3705	4.88327e-25	1.30849e-22
	L1MA3	LINE	L1	7937.41	0.97	0.09	10.25	11684	5183	1.19379e-24	3.0534e-22
	L1MC1	LINE	L1	8460.67	0.88	0.09	10.2	12129	5750	1.97793e-24	4.83906e-22
	L1M1	LINE	L1	6481.46	0.99	0.1	10.15	9633	4194	3.30338e-24	7.61178e-22
	L1MA2	LINE	L1	5851.34	0.94	0.09	10.08	8602	3869	6.54042e-24	1.43388e-21
	L1MEc	LINE	L1	9315.86	0.86	0.09	10.01	13370	6399	1.40906e-23	3.01094e-21
	L1MA1	LINE	L1	3408.59	0.97	0.1	10.01	5045	2217	1.40472e-23	3.01094e-21
	L1MB1	LINE	L1	3014.29	0.89	0.09	9.88	4345	2031	4.85954e-23	9.76594e-21
	L1PREC2	LINE	L1	7453.74	0.86	0.09	9.65	10716	5111	4.80878e-22	9.33069e-20
	L1MA7	LINE	L1	4515.65	0.79	0.08	9.59	6330	3185	9.00266e-22	1.6886e-19
	L1M2	LINE	L1	4648.73	0.89	0.09	9.54	6704	3148	1.38879e-21	2.57629e-19
	L1MCa	LINE	L1	4011.6	0.92	0.1	9.53	5854	2675	1.57938e-21	2.86682e-19
	L1MA9	LINE	L1	8277.07	0.85	0.09	9.5	11823	5714	2.01017e-21	3.60997e-19
	L1MC3	LINE	L1	7238.63	0.8	0.08	9.48	10238	5094	2.65795e-21	4.53221e-19
	L1PA17	LINE	L1	3063.4	0.95	0.1	9.46	4516	2007	2.95833e-21	4.94452e-19
	L1PB4	LINE	L1	4170.29	0.91	0.1	9.44	6095	2789	3.5956e-21	5.95071e-19
	L1MB3	LINE	L1	9458.84	0.76	0.08	9.25	13169	6793	2.24653e-20	3.38605e-18
	L1PB2	LINE	L1	2391.4	0.99	0.11	9.22	3558	1538	3.01055e-20	4.49744e-18
	L1ME1	LINE	L1	17859.8	0.69	0.07	9.18	24366	13220	4.23499e-20	6.163e-18
	L1PB3	LINE	L1	2362.57	1.01	0.11	9.18	3525	1503	4.41851e-20	6.37512e-18
	L1ME3A	LINE	L1	6248.63	0.7	0.08	9.14	8566	4587	5.98754e-20	8.49376e-18
	L1MB8	LINE	L1	10089.4	0.7	0.08	9.12	13824	7425	7.8557e-20	1.1051e-17
	L1P1	LINE	L1	3658.34	0.93	0.1	9.1	5388	2426	9.02529e-20	1.24882e-17
	L1MEf	LINE	L1	6049.92	0.85	0.09	9.06	8652	4177	1.24644e-19	1.65679e-17
	L1MB7	LINE	L1	14259.6	0.66	0.07	9.04	19317	10657	1.58285e-19	2.0875e-17
	L1MEg	LINE	L1	6923.2	0.75	0.08	9.03	9653	4978	1.7125e-19	2.24098e-17
	L1ME5	LINE	L1	1042.33	1.02	0.11	9	1551	654	2.25016e-19	2.89962e-17
	L1MC2	LINE	L1	3477.09	0.8	0.09	9	4918	2441	2.3449e-19	2.99881e-17
	L1MA6	LINE	L1	3226.44	0.84	0.1	8.85	4621	2227	8.72548e-19	1.06735e-16
	L1MA4A	LINE	L1	4505.58	0.89	0.1	8.83	6527	3052	1.0034e-18	1.21859e-16
	HAL1	LINE	L1	13083.8	0.7	0.08	8.82	18037	9617	1.15395e-18	1.38155e-16
	L1HS	LINE	L1	2350.66	0.95	0.11	8.8	3484	1541	1.31105e-18	1.53693e-16
	L1MEd	LINE	L1	10383.6	0.69	0.08	8.67	14199	7666	4.4327e-18	5.02204e-16
	L1MB4	LINE	L1	4877.19	0.7	0.08	8.63	6672	3579	6.35038e-18	7.14672e-16
	L1P2	LINE	L1	3094.87	0.88	0.1	8.55	4495	2104	1.18849e-17	1.30278e-15
	L1M5	LINE	L1	19312.8	0.6	0.07	8.54	25732	14813	1.32797e-17	1.42786e-15
	L1M4	LINE	L1	10528.8	0.64	0.08	8.54	14261	7922	1.39053e-17	1.48566e-15
	L1MC4	LINE	L1	12598.3	0.63	0.07	8.51	16958	9552	1.67394e-17	1.75514e-15
	L1P3	LINE	L1	3044.59	0.83	0.1	8.49	4349	2118	2.1163e-17	2.19173e-15
	L1MEi	LINE	L1	2064.38	0.83	0.1	8.48	2929	1431	2.26065e-17	2.32696e-15
	L1PBa	LINE	L1	2091.83	0.91	0.11	8.45	3065	1395	2.86847e-17	2.91702e-15
	L1MC5a	LINE	L1	7312.5	0.59	0.07	8.42	9718	5607	3.70986e-17	3.70569e-15
	L1MB5	LINE	L1	5086.64	0.72	0.09	8.41	7010	3714	4.16702e-17	4.11365e-15
	L1MA10	LINE	L1	1634	0.98	0.12	8.32	2424	1055	8.97148e-17	8.46076e-15
	L1MA5	LINE	L1	3224.67	0.71	0.09	8.31	4415	2353	9.83856e-17	9.22693e-15
	L1M4b	LINE	L1	2515.54	0.8	0.1	8.25	3544	1770	1.52702e-16	1.41635e-14
	L1MEh	LINE	L1	876.03	0.97	0.12	8.25	1309	561	1.61511e-16	1.48987e-14
	L1ME2	LINE	L1	6219.71	0.66	0.08	8.24	8384	4659	1.70302e-16	1.55398e-14
	L1MD1	LINE	L1	4944.59	0.7	0.09	8.13	6799	3642	4.21527e-16	3.70614e-14
	L1MB2	LINE	L1	5000.71	0.69	0.08	8.12	6837	3697	4.727e-16	4.13453e-14
	L1PB	LINE	L1	922.32	0.94	0.12	8.04	1360	602	8.75672e-16	7.58062e-14
	L1ME2z	LINE	L1	2943.92	0.72	0.09	8.04	4071	2139	8.90577e-16	7.67032e-14
	L1MC4a	LINE	L1	5191.27	0.64	0.08	8.04	7023	3909	9.2776e-16	7.90985e-14
	L1MDa	LINE	L1	4499.93	0.79	0.1	7.96	6380	3190	1.65511e-15	1.35631e-13
	L1MCb	LINE	L1	839.85	1.03	0.13	7.92	1279	524	2.41715e-15	1.9712e-13
	L1MCc	LINE	L1	1255.72	0.88	0.11	7.85	1819	845	4.06432e-15	3.23631e-13
	L1M4c	LINE	L1	2184.89	0.76	0.1	7.81	3068	1563	5.55535e-15	4.34166e-13
	L1MD2	LINE	L1	6853.89	0.59	0.08	7.8	9080	5270	6.33675e-15	4.90691e-13
	L1M4a1	LINE	L1	1356.63	0.77	0.1	7.76	1900	958	8.63516e-15	6.56622e-13
	L1ME3Cz	LINE	L1	4624.41	0.66	0.08	7.72	6248	3466	1.12324e-14	8.38999e-13
	L1ME3	LINE	L1	3847.17	0.68	0.09	7.72	5234	2848	1.19387e-14	8.87827e-13
	L1ME4b	LINE	L1	8111.24	0.56	0.07	7.63	10694	6310	2.29044e-14	1.65235e-12
	L1P4	LINE	L1	1567.84	0.84	0.11	7.63	2229	1080	2.4366e-14	1.74289e-12
	L1M6	LINE	L1	2449.62	0.64	0.08	7.62	3306	1836	2.49917e-14	1.7801e-12
	L1ME3G	LINE	L1	5709.21	0.58	0.08	7.52	7576	4410	5.30604e-14	3.6351e-12
	L1M3	LINE	L1	2535.41	0.72	0.1	7.37	3503	1848	1.76674e-13	1.16501e-11
	L1M7	LINE	L1	1322.71	0.86	0.12	7.33	1916	902	2.29742e-13	1.50321e-11
	L1M4a2	LINE	L1	1040.05	0.79	0.11	7.32	1470	727	2.44563e-13	1.594e-11
	L1ME4a	LINE	L1	10275	0.51	0.07	7.27	13315	8173	3.64651e-13	2.3229e-11
	L1MC5	LINE	L1	5870.28	0.61	0.09	7.08	7877	4499	1.4721e-12	8.75017e-11
	L1MC	LINE	L1	2524.44	0.68	0.1	7.05	3447	1876	1.8302e-12	1.06905e-10
	L2c	LINE	L2	55058.5	0.59	0.08	6.92	73390	42713	4.54094e-12	2.50509e-10
	L2b	LINE	L2	34472.6	0.6	0.09	6.73	46153	26637	1.66358e-11	8.48424e-10
	L1MD3	LINE	L1	2783.91	0.58	0.09	6.69	3706	2146	2.18858e-11	1.0963e-09
	L1ME3F	LINE	L1	2217.12	0.57	0.09	6.61	2931	1710	3.88673e-11	1.88e-09
	HAL1b	LINE	L1	1695.94	0.74	0.11	6.58	2378	1226	4.756e-11	2.25238e-09
	L1ME3B	LINE	L1	4725.42	0.51	0.08	6.41	6125	3765	1.44092e-10	6.40111e-09
	HAL1M8	LINE	L1	1254.23	0.67	0.11	6.3	1716	930	2.89603e-10	1.24081e-08
	L1ME3E	LINE	L1	2190.78	0.59	0.09	6.3	2920	1686	2.99611e-10	1.28044e-08
	L1PA12	LINE	L1	3168.98	0.58	0.09	6.28	4182	2458	3.36379e-10	1.4196e-08
	L1M3f	LINE	L1	623.3	0.86	0.14	6.23	904	422	4.52312e-10	1.87604e-08
	L1MD	LINE	L1	4173.44	0.52	0.09	6.14	5430	3310	8.01978e-10	3.21572e-08
	L1MEj	LINE	L1	1153.06	0.67	0.11	6.09	1579	855	1.10509e-09	4.33839e-08
	L1ME4c	LINE	L1	3241.24	0.47	0.08	6.01	4139	2606	1.8045e-09	6.79952e-08
	L1M8	LINE	L1	843.55	0.79	0.13	6	1202	594	1.95271e-09	7.27676e-08
	L1MEb	LINE	L1	717.57	0.75	0.13	5.9	1014	510	3.53513e-09	1.27242e-07
	L1ME3D	LINE	L1	1991.63	0.57	0.1	5.89	2637	1549	3.81482e-09	1.36436e-07
	L1M3b	LINE	L1	200.4	1.14	0.2	5.85	327	110	4.79652e-09	1.68337e-07
	L1PBa1	LINE	L1	716.06	0.73	0.12	5.84	1007	513	5.07722e-09	1.7745e-07
	HAL1ME	LINE	L1	4065.43	0.42	0.07	5.68	5147	3337	1.35637e-08	4.41174e-07
	L1ME3C	LINE	L1	1157.29	0.6	0.11	5.45	1560	885	5.13192e-08	1.51986e-06
	L3	LINE	CR1	24525.9	0.38	0.07	5.38	30582	20590	7.32678e-08	2.10704e-06
	L1MDb	LINE	L1	328.45	0.92	0.18	5.26	496	211	1.41579e-07	3.8377e-06
	L1P4a	LINE	L1	520.1	0.78	0.15	5.16	754	363	2.46514e-07	6.40215e-06
	L1PA15	LINE	L1	6735.98	0.9	0.18	5.1	10062	4338	3.42929e-07	8.64029e-06
	L2-3_Crp	LINE	L2	614.55	0.75	0.15	5.06	879	439	4.26012e-07	1.0468e-05
	L1PB1	LINE	L1	13199.9	0.88	0.18	5.03	19666	8594	4.78109e-07	1.14971e-05
	L1PA6	LINE	L1	11592.3	0.93	0.18	5.02	17570	7315	5.11759e-07	1.21848e-05
	L1PA11	LINE	L1	4273.86	0.88	0.18	5.02	6354	2783	5.20689e-07	1.23503e-05
	L1PA7	LINE	L1	23013	0.87	0.17	5	34039	15106	5.75792e-07	1.33699e-05
	L1M3c	LINE	L1	501.82	0.73	0.15	4.9	708	359	9.71022e-07	2.13992e-05
	L1PA5	LINE	L1	18984.3	0.86	0.18	4.84	28079	12504	1.29595e-06	2.78686e-05
	L1PA16	LINE	L1	11474.5	0.81	0.17	4.76	16643	7783	1.93731e-06	4.01272e-05
	L1PA14	LINE	L1	2920.84	0.87	0.18	4.75	4370	1900	2.05475e-06	4.23519e-05
	L1PA13	LINE	L1	7767.25	0.83	0.18	4.67	11381	5206	2.97811e-06	5.89373e-05
	L1PA8A	LINE	L1	3041.62	0.94	0.2	4.66	4649	1878	3.09402e-06	6.09453e-05
	L4_A_Mam	LINE	RTE-X	2783.56	0.41	0.09	4.66	3513	2310	3.23471e-06	6.32736e-05
	L1MEg1	LINE	L1	245.2	0.8	0.17	4.63	355	164	3.69216e-06	7.10688e-05
	L1PA4	LINE	L1	18797.8	0.9	0.2	4.53	28496	11859	5.85234e-06	0.000105549
	Plat_L3	LINE	CR1	1540.19	0.44	0.1	4.53	1954	1257	5.97253e-06	0.000107258
	MamRTE1	LINE	RTE-BovB	3779.92	0.37	0.08	4.43	4728	3185	9.42535e-06	0.000161042
	L1M3d	LINE	L1	232.03	0.85	0.19	4.42	342	153	9.89029e-06	0.000167293
	L1PA8	LINE	L1	7341.91	0.98	0.22	4.41	11560	4281	1.05414e-05	0.000176362
	L1PA10	LINE	L1	9172.93	0.76	0.18	4.33	13024	6378	1.51662e-05	0.000244761
	L1PA3	LINE	L1	18873	0.86	0.2	4.31	28260	12204	1.61214e-05	0.000258693
	L1M3e	LINE	L1	606.21	0.58	0.14	4.26	806	466	2.00474e-05	0.000314518
	L1MEg2	LINE	L1	251.33	0.82	0.19	4.22	368	169	2.41252e-05	0.000367229
	L1PA2	LINE	L1	9127.49	0.86	0.2	4.22	13738	5850	2.42204e-05	0.000368347
	L1M2a	LINE	L1	307.02	0.72	0.17	4.16	436	219	3.24483e-05	0.000477558
	L2a	LINE	L2	69943.9	0.63	0.16	3.96	95837	52131	7.34431e-05	0.000982403
	L2	LINE	L2	25685.8	0.7	0.18	3.95	36053	18458	7.78457e-05	0.00103473
	L3b	LINE	CR1	4416.58	0.31	0.08	3.87	5410	3809	0.000109697	0.00138607
	L1M2c	LINE	L1	285.32	0.67	0.17	3.84	397	208	0.000124153	0.00153652
	CR1-3_Croc	LINE	CR1	436.03	0.53	0.14	3.8	572	337	0.000146938	0.00176044
	L1M3a	LINE	L1	314.51	0.61	0.16	3.72	429	236	0.000199091	0.00227546
	CR1_Mam	LINE	CR1	1001.68	0.39	0.11	3.71	1267	828	0.00020565	0.00233962
	L2-1_AMi	LINE	L2	254.44	0.68	0.18	3.7	363	184	0.000216252	0.00244176
	L1PBb	LINE	L1	179.92	0.72	0.2	3.7	261	124	0.00021639	0.00244176
	L4_B_Mam	LINE	RTE-X	1200.44	0.41	0.11	3.69	1521	997	0.000227403	0.00254392
	L4_C_Mam	LINE	RTE-X	1940.92	0.35	0.1	3.59	2399	1651	0.000331614	0.0035075
	L1P4e	LINE	L1	154.16	0.7	0.2	3.43	221	107	0.000599743	0.00581787
	L1PA15-16	LINE	L1	765.95	0.84	0.26	3.27	1219	437	0.0010862	0.0095798
	L1M2b	LINE	L1	98.41	0.74	0.23	3.19	144	65	0.00142513	0.0120108
	X7B_LINE	LINE	CR1	285.15	0.51	0.16	3.13	374	221	0.0017541	0.0143673
	L1M3de	LINE	L1	440.85	0.44	0.14	3.12	559	354	0.00179787	0.0146618
	L1MEa	LINE	L1	140.58	0.62	0.21	2.96	197	102	0.00309725	0.0230025
	L1P5	LINE	L1	147.16	0.62	0.22	2.89	206	107	0.00382583	0.0272161
	ERV3-16A3_I-int	LTR	ERVL	2276.74	1.04	0.1	10.11	3426	1430	5.08293e-24	1.12901e-21
	MLT1D	LTR	ERVL-MaLR	9927.58	0.7	0.09	8.17	13662	7325	3.0689e-16	2.77038e-14
	MLT2B1	LTR	ERVL	1142.97	0.89	0.11	8.01	1671	764	1.19196e-15	1.00607e-13
	LTR78	LTR	ERV1	1552.77	0.85	0.11	7.62	2242	1063	2.53666e-14	1.79922e-12
	LTR85a	LTR	Gypsy	398.03	1.17	0.15	7.57	627	226	3.74112e-14	2.60966e-12
	MLT1K	LTR	ERVL-MaLR	3943.62	0.76	0.1	7.54	5548	2831	4.78055e-14	3.2939e-12
	MER41A	LTR	ERV1	893.9	0.86	0.12	7.39	1287	606	1.47864e-13	9.78859e-12
	MLT1A	LTR	ERVL-MaLR	3048.02	0.69	0.09	7.24	4202	2256	4.35397e-13	2.74252e-11
	ERVL-B4-int	LTR	ERVL	1939.13	0.8	0.11	7.22	2761	1363	5.13931e-13	3.21321e-11
	MLT1C	LTR	ERVL-MaLR	7613.05	0.66	0.09	7.14	10375	5721	9.58615e-13	5.86318e-11
	MLT2A2	LTR	ERVL	1315.5	0.76	0.11	7.11	1854	937	1.14247e-12	6.91258e-11
	MLT1B	LTR	ERVL-MaLR	5879.47	0.69	0.1	7.05	8071	4373	1.74063e-12	1.02382e-10
	HERVL-int	LTR	ERVL	2593.47	0.66	0.1	6.94	3551	1937	3.8981e-12	2.1575e-10
	MSTD	LTR	ERVL-MaLR	2556.09	0.64	0.09	6.86	3474	1924	6.92774e-12	3.74831e-10
	LTR8B	LTR	ERV1	482.21	1	0.15	6.84	725	302	8.16343e-12	4.38875e-10
	THE1D	LTR	ERVL-MaLR	4698.63	0.63	0.09	6.83	6340	3568	8.51118e-12	4.56118e-10
	LTR7	LTR	ERV1	474.79	1.02	0.15	6.78	720	294	1.22299e-11	6.41158e-10
	MLT1A0	LTR	ERVL-MaLR	6966.81	0.6	0.09	6.69	9340	5372	2.26036e-11	1.12891e-09
	MLT1O	LTR	ERVL-MaLR	1119.11	0.75	0.11	6.67	1572	800	2.63143e-11	1.29508e-09
	LTR85c	LTR	Gypsy	237.31	1.19	0.18	6.63	375	128	3.33013e-11	1.62005e-09
	MLT2B3	LTR	ERVL	1320.25	0.72	0.11	6.59	1820	960	4.53976e-11	2.18335e-09
	LTR16C	LTR	ERVL	1799.17	0.75	0.11	6.55	2520	1295	5.65023e-11	2.65687e-09
	LTR7B	LTR	ERV1	308.92	1.09	0.17	6.51	484	180	7.44379e-11	3.47123e-09
	LTR33	LTR	ERVL	2563.96	0.72	0.11	6.49	3595	1874	8.76803e-11	4.03305e-09
	THE1B-int	LTR	ERVL-MaLR	5223.27	0.52	0.08	6.47	6821	4144	9.85143e-11	4.50683e-09
	MLT2D	LTR	ERVL	1026.18	0.73	0.11	6.38	1436	740	1.79248e-10	7.90051e-09
	MLT1J	LTR	ERVL-MaLR	3784.57	0.62	0.1	6.31	5120	2894	2.79327e-10	1.20289e-08
	MLT2A1	LTR	ERVL	1017.25	0.7	0.11	6.29	1410	742	3.23134e-10	1.37401e-08
	ERVL-E-int	LTR	ERVL	3636.73	0.58	0.09	6.29	4840	2822	3.25536e-10	1.38075e-08
	MLT1E2	LTR	ERVL-MaLR	2161.25	0.56	0.09	6.26	2861	1682	3.80983e-10	1.59192e-08
	HERV16-int	LTR	ERVL	483.42	1.01	0.16	6.2	741	300	5.4922e-10	2.25033e-08
	THE1A	LTR	ERVL-MaLR	1878.84	0.59	0.1	6.07	2506	1445	1.2914e-09	5.00004e-08
	LTR16A	LTR	ERVL	1075.23	0.72	0.12	6.01	1497	782	1.80451e-09	6.79952e-08
	MLT1A1	LTR	ERVL-MaLR	2255.35	0.59	0.1	6.01	3015	1738	1.90857e-09	7.14382e-08
	MLT2B4	LTR	ERVL	1322.16	0.63	0.11	5.98	1798	996	2.22463e-09	8.21751e-08
	MER31A	LTR	ERV1	413.52	0.99	0.17	5.97	632	258	2.34184e-09	8.63157e-08
	MER65A	LTR	ERV1	496.13	0.88	0.15	5.97	730	330	2.35588e-09	8.6644e-08
	MLT1H	LTR	ERVL-MaLR	2397.46	0.66	0.11	5.96	3265	1806	2.46015e-09	9.02822e-08
	MLT1J1	LTR	ERVL-MaLR	944.98	0.69	0.12	5.85	1300	694	5.02989e-09	1.76161e-07
	MLT1J-int	LTR	ERVL-MaLR	346.54	0.91	0.16	5.83	509	223	5.61899e-09	1.94773e-07
	MLT1H1	LTR	ERVL-MaLR	1001.73	0.67	0.12	5.78	1356	741	7.32619e-09	2.47842e-07
	THE1C	LTR	ERVL-MaLR	3914.07	0.59	0.1	5.78	5247	3034	7.37026e-09	2.48835e-07
	MER50	LTR	ERV1	732.66	0.74	0.13	5.77	1028	525	8.0319e-09	2.70093e-07
	MER57A1	LTR	ERV1	325.81	0.93	0.16	5.76	485	208	8.17065e-09	2.74212e-07
	MSTA-int	LTR	ERVL-MaLR	3722.63	0.52	0.09	5.75	4846	2957	8.70969e-09	2.91145e-07
	LTR12C	LTR	ERV1	2879.14	0.51	0.09	5.73	3765	2291	1.02188e-08	3.36922e-07
	LTR78B	LTR	ERV1	1226.93	0.63	0.11	5.72	1660	927	1.06102e-08	3.49145e-07
	LTR50	LTR	ERVL	672.47	0.76	0.13	5.71	942	477	1.139e-08	3.72763e-07
	LOR1b	LTR	ERV1	286.62	0.97	0.17	5.68	437	178	1.369e-08	4.44426e-07
	MLT1H2	LTR	ERVL-MaLR	859.38	0.69	0.12	5.64	1190	631	1.73309e-08	5.52005e-07
	HERVIP10F-int	LTR	ERV1	339.44	0.88	0.16	5.63	496	222	1.83868e-08	5.81249e-07
	MER4A1	LTR	ERV1	701.39	0.69	0.12	5.63	973	511	1.85306e-08	5.83609e-07
	LTR8	LTR	ERV1	1203.15	0.64	0.11	5.59	1637	907	2.26453e-08	7.01422e-07
	LTR85b	LTR	Gypsy	393.21	0.91	0.16	5.57	580	257	2.52909e-08	7.76247e-07
	MLT1I	LTR	ERVL-MaLR	2620.37	0.55	0.1	5.57	3475	2060	2.60023e-08	7.96634e-07
	HERV17-int	LTR	ERV1	411.44	0.89	0.16	5.54	604	272	2.99263e-08	9.08607e-07
	MER39	LTR	ERV1	801.41	0.75	0.14	5.53	1145	573	3.19401e-08	9.68009e-07
	MER41B	LTR	ERV1	807.53	0.78	0.14	5.53	1139	571	3.20951e-08	9.69225e-07
	MLT1L	LTR	ERVL-MaLR	3028.11	0.54	0.1	5.48	4006	2391	4.33212e-08	1.29434e-06
	MER4-int	LTR	ERV1	801.17	0.65	0.12	5.42	1102	595	5.9654e-08	1.74225e-06
	MSTB-int	LTR	ERVL-MaLR	697.49	0.7	0.13	5.37	966	509	7.82824e-08	2.24742e-06
	HERV9-int	LTR	ERV1	338.19	0.87	0.16	5.37	499	223	7.88361e-08	2.25948e-06
	MER21-int	LTR	ERVL	418.99	0.78	0.15	5.36	596	290	8.53226e-08	2.42072e-06
	LTR16A1	LTR	ERVL	609.23	0.7	0.13	5.34	842	442	9.22556e-08	2.60865e-06
	MLT1I-int	LTR	ERVL-MaLR	256.58	0.93	0.17	5.33	387	162	9.87088e-08	2.77717e-06
	LTR29	LTR	ERV1	215.33	0.97	0.18	5.3	326	131	1.13963e-07	3.16937e-06
	HERVH48-int	LTR	ERV1	70.37	1.37	0.26	5.28	138	24	1.29358e-07	3.53922e-06
	LTR16E1	LTR	ERVL	598.76	0.78	0.15	5.26	862	421	1.41632e-07	3.8377e-06
	MSTB1	LTR	ERVL-MaLR	1661.56	0.61	0.12	5.26	2238	1277	1.42183e-07	3.84645e-06
	ERV3-16A3_LTR	LTR	ERVL	191.95	1.07	0.2	5.26	304	110	1.44154e-07	3.89355e-06
	LTR39	LTR	ERV1	363.59	0.8	0.15	5.21	527	247	1.89225e-07	5.05429e-06
	MLT1F2	LTR	ERVL-MaLR	2158.28	0.51	0.1	5.2	2824	1721	2.01196e-07	5.32086e-06
	THE1D-int	LTR	ERVL-MaLR	2539.23	0.5	0.1	5.2	3286	2038	2.03089e-07	5.35678e-06
	MLT1E1A	LTR	ERVL-MaLR	1261.24	0.54	0.1	5.16	1648	989	2.4271e-07	6.3387e-06
	THE1C-int	LTR	ERVL-MaLR	1883.52	0.52	0.1	5.16	2462	1499	2.51208e-07	6.51405e-06
	MER4B	LTR	ERV1	654.93	0.7	0.14	5.13	910	478	2.86185e-07	7.30875e-06
	LTR79	LTR	ERVL	854.17	0.66	0.13	5.13	1180	638	2.91425e-07	7.43133e-06
	MER52-int	LTR	ERV1	122.95	1.18	0.23	5.11	209	62	3.27585e-07	8.30325e-06
	MamGypLTR1a	LTR	Gypsy	201.78	1.02	0.2	5.09	318	120	3.52766e-07	8.84851e-06
	MER31B	LTR	ERV1	499.48	0.8	0.16	5.09	726	347	3.57103e-07	8.944e-06
	LTR1A2	LTR	ERV1	409.93	0.79	0.16	5.09	582	283	3.65811e-07	9.09463e-06
	LTR49	LTR	ERV1	326.38	0.8	0.16	5.06	473	221	4.2544e-07	1.0468e-05
	LTR37B	LTR	ERV1	372.62	0.8	0.16	5.05	533	256	4.31627e-07	1.05906e-05
	LTR49-int	LTR	ERV1	609.88	0.68	0.13	5.05	836	448	4.3612e-07	1.06698e-05
	MLT1J2	LTR	ERVL-MaLR	1556.54	0.53	0.11	5.05	2048	1231	4.52502e-07	1.10067e-05
	LTR103b_Mam	LTR	ERV1	169.1	1.03	0.2	5.03	263	98	4.85414e-07	1.16231e-05
	MER74A	LTR	ERVL	773.75	0.65	0.13	5.03	1069	578	4.99936e-07	1.19369e-05
	LTR12_	LTR	ERV1	223.04	0.93	0.19	5.02	334	140	5.20906e-07	1.23503e-05
	MLT1N2	LTR	ERVL-MaLR	1091.24	0.57	0.11	5.01	1461	846	5.3235e-07	1.25336e-05
	MLT1F	LTR	ERVL-MaLR	1387.64	0.55	0.11	5	1832	1088	5.59953e-07	1.3038e-05
	HERV9N-int	LTR	ERV1	145.14	1.08	0.22	5	238	80	5.5937e-07	1.3038e-05
	MLT1F1	LTR	ERVL-MaLR	976.78	0.62	0.12	4.97	1315	743	6.68681e-07	1.53578e-05
	MLT1A0-int	LTR	ERVL-MaLR	553.51	0.65	0.13	4.97	751	409	6.86832e-07	1.57106e-05
	MSTC	LTR	ERVL-MaLR	981.74	0.58	0.12	4.95	1316	757	7.43694e-07	1.67838e-05
	MER89	LTR	ERV1	386.36	0.73	0.15	4.95	539	272	7.51229e-07	1.69312e-05
	LTR48	LTR	ERV1	343.28	0.78	0.16	4.93	497	235	8.17046e-07	1.82441e-05
	LTR16E2	LTR	ERVL	722.99	0.62	0.13	4.92	982	547	8.81453e-07	1.9553e-05
	MER21B	LTR	ERVL	1830.67	0.48	0.1	4.88	2361	1478	1.03719e-06	2.27388e-05
	MER34A	LTR	ERV1	330	0.77	0.16	4.88	472	228	1.07438e-06	2.34324e-05
	MER4D	LTR	ERV1	354.07	0.83	0.17	4.82	523	239	1.40147e-06	2.98792e-05
	MLT2C1	LTR	ERVL	437.42	0.74	0.15	4.81	617	311	1.49061e-06	3.16516e-05
	MamGypLTR1b	LTR	Gypsy	216.64	0.93	0.2	4.77	329	136	1.87084e-06	3.89435e-05
	LTR8A	LTR	ERV1	490.11	0.68	0.14	4.75	682	358	1.99129e-06	4.11948e-05
	MamGypLTR1d	LTR	Gypsy	127.26	1.06	0.22	4.75	205	70	2.01301e-06	4.15932e-05
	HERV9NC-int	LTR	ERV1	585.05	0.63	0.13	4.75	785	437	2.08004e-06	4.28209e-05
	HERVFH21-int	LTR	ERV1	59.2	1.24	0.26	4.74	111	22	2.17863e-06	4.45786e-05
	MamGypLTR2c	LTR	Gypsy	216.82	0.88	0.19	4.74	322	140	2.18895e-06	4.47357e-05
	LTR32	LTR	ERVL	335.6	0.76	0.16	4.73	477	234	2.26813e-06	4.62418e-05
	MLT1G1	LTR	ERVL-MaLR	1164.97	0.52	0.11	4.73	1526	924	2.29773e-06	4.6789e-05
	LOR1a	LTR	ERV1	298.52	0.78	0.16	4.72	422	205	2.39469e-06	4.85292e-05
	HERVL40-int	LTR	ERVL	735.33	0.55	0.12	4.71	967	567	2.47028e-06	4.98814e-05
	MER11C	LTR	ERVK	1029.74	0.53	0.11	4.65	1366	811	3.30726e-06	6.44686e-05
	MER4CL34	LTR	ERV1	269.22	0.8	0.17	4.65	384	182	3.33921e-06	6.50164e-05
	MamGypLTR2b	LTR	Gypsy	117.04	1.04	0.22	4.64	187	65	3.47837e-06	6.73376e-05
	MER4D1	LTR	ERV1	788.7	0.57	0.12	4.63	1051	611	3.68131e-06	7.09408e-05
	LTR101_Mam	LTR	ERVL	370.02	0.77	0.17	4.62	523	258	3.84882e-06	7.39999e-05
	LTR22A	LTR	ERVK	60.95	1.18	0.26	4.62	109	26	3.86292e-06	7.41197e-05
	MLT1E3	LTR	ERVL-MaLR	699.11	0.58	0.13	4.61	933	537	3.93364e-06	7.5071e-05
	LTR103_Mam	LTR	ERV1	153.84	0.95	0.21	4.59	234	93	4.45045e-06	8.36615e-05
	LTR12D	LTR	ERV1	291.11	0.74	0.16	4.58	410	201	4.69526e-06	8.74843e-05
	MER66-int	LTR	ERV1	280.37	0.82	0.18	4.56	416	189	5.10096e-06	9.39032e-05
	MSTB2	LTR	ERVL-MaLR	582.77	0.63	0.14	4.56	800	438	5.21505e-06	9.55866e-05
	LTR60B	LTR	ERV1	90.13	1.11	0.24	4.54	154	45	5.51207e-06	0.000100377
	LTR67B	LTR	ERVL	688.79	0.57	0.13	4.54	925	531	5.74706e-06	0.000104206
	MLT2C2	LTR	ERVL	199.71	0.86	0.19	4.53	291	129	5.87437e-06	0.000105833
	MamRep605	LTR?	MamRep605?	1564	0.44	0.1	4.53	1985	1279	5.91762e-06	0.000106385
	MamGypLTR3a	LTR	Gypsy	244.71	0.83	0.18	4.52	363	163	6.09164e-06	0.000109165
	MER57-int	LTR	ERV1	702.55	0.54	0.12	4.52	922	545	6.0984e-06	0.00010917
	LTR16B1	LTR	ERVL	338	0.76	0.17	4.52	482	237	6.30112e-06	0.000112441
	MLT1J2-int	LTR	ERVL-MaLR	152.09	0.92	0.21	4.47	231	93	7.71291e-06	0.000134367
	LTR9D	LTR	ERV1	241.22	0.84	0.19	4.47	359	160	7.73666e-06	0.000134642
	LTR81C	LTR	Gypsy	116.08	1.02	0.23	4.44	190	65	8.79231e-06	0.000151917
	LTR9	LTR	ERV1	192.4	0.92	0.21	4.44	297	120	8.96694e-06	0.000154618
	LTR88b	LTR	Gypsy	379.79	0.72	0.16	4.43	531	272	9.59921e-06	0.000163516
	MER4E1	LTR	ERV1	368.06	0.68	0.15	4.42	503	266	9.77781e-06	0.000166056
	LTR89	LTR	ERVL	236.07	0.82	0.18	4.42	348	158	9.88523e-06	0.000167293
	LTR16	LTR	ERVL	690.37	0.63	0.14	4.41	950	522	1.03882e-05	0.000174491
	MER4E	LTR	ERV1	298.89	0.72	0.16	4.4	421	211	1.08136e-05	0.000180531
	LTR12	LTR	ERV1	446.88	0.66	0.15	4.36	616	330	1.29406e-05	0.000211472
	LOR1-int	LTR	ERV1	472.43	0.61	0.14	4.35	639	355	1.33661e-05	0.000217582
	LTR33A	LTR	ERVL	526.88	0.64	0.15	4.34	726	395	1.43804e-05	0.000233419
	LTR16A2	LTR	ERVL	437.44	0.75	0.17	4.33	624	311	1.48369e-05	0.000239905
	HERVK14-int	LTR	ERVK	191.91	0.84	0.19	4.31	283	126	1.61996e-05	0.000259702
	MER49	LTR	ERV1	881.21	0.47	0.11	4.31	1133	704	1.65419e-05	0.000264435
	HERVK22-int	LTR	ERVK	420.18	0.64	0.15	4.29	576	312	1.81839e-05	0.000288227
	LTR26C	LTR	ERV1	53.71	1.1	0.26	4.28	93	23	1.83811e-05	0.000291081
	MLT1A1-int	LTR	ERVL-MaLR	308.83	0.69	0.16	4.26	431	222	2.04262e-05	0.000319866
	MER4C	LTR	ERV1	231.74	0.78	0.18	4.26	339	158	2.06115e-05	0.000322468
	LTR16B2	LTR	ERVL	417.39	0.68	0.16	4.25	579	305	2.1097e-05	0.000329148
	LTR19B	LTR	ERV1	67.96	1.08	0.25	4.24	117	32	2.24419e-05	0.000347103
	MER4B-int	LTR	ERV1	558.07	0.56	0.13	4.23	746	430	2.30264e-05	0.000353693
	MamGypLTR1c	LTR	Gypsy	213.89	0.8	0.19	4.23	314	144	2.29681e-05	0.000353693
	LTR88a	LTR	Gypsy	198.59	0.8	0.19	4.22	290	133	2.43237e-05	0.000369584
	MER72	LTR	ERV1	216.89	0.77	0.18	4.22	308	147	2.44688e-05	0.000371454
	MER67D	LTR	ERV1	170.42	0.88	0.21	4.2	262	108	2.61855e-05	0.000395736
	MER54A	LTR	ERVL	215.99	0.87	0.21	4.17	331	140	3.03329e-05	0.000451942
	MER31-int	LTR	ERV1	271.09	0.72	0.17	4.16	384	192	3.21216e-05	0.000474405
	MLT2B2	LTR	ERVL	703.85	0.5	0.12	4.14	927	555	3.43321e-05	0.000503527
	LTR104_Mam	LTR	Gypsy	374.43	0.63	0.15	4.12	511	279	3.80592e-05	0.000551482
	MER39B	LTR	ERV1	474.44	0.6	0.15	4.11	651	359	3.89045e-05	0.000561321
	MER54B	LTR	ERVL	92.09	0.97	0.24	4.11	143	51	4.00431e-05	0.000576272
	MER57A-int	LTR	ERV1	865.02	0.47	0.12	4.1	1108	695	4.07117e-05	0.000584897
	MER41-int	LTR	ERV1	1181.45	0.41	0.1	4.09	1504	970	4.33699e-05	0.000618874
	LTR81A	LTR	Gypsy	196.4	0.79	0.19	4.08	291	132	4.41172e-05	0.000629006
	MLT1H-int	LTR	ERVL-MaLR	218.44	0.77	0.19	4.08	313	149	4.49466e-05	0.000638815
	MER77B	LTR	ERVL	390.97	0.66	0.16	4.08	549	288	4.55273e-05	0.000645838
	MER57B2	LTR	ERV1	333.31	0.66	0.16	4.07	463	244	4.61643e-05	0.000652735
	MLT1G1-int	LTR	ERVL-MaLR	150.05	0.83	0.21	4.04	218	96	5.35159e-05	0.000746614
	MER92-int	LTR	ERV1	206.93	0.77	0.19	4.03	308	139	5.66719e-05	0.00078545
	LTR7C	LTR	ERV1	86.58	1	0.25	4.02	141	46	5.82021e-05	0.000800742
	HERVIP10B3-int	LTR	ERV1	290.32	0.67	0.17	4	405	211	6.2538e-05	0.000853439
	MLT2F	LTR	ERVL	631.04	0.52	0.13	3.99	825	497	6.66153e-05	0.000899627
	HUERS-P1-int	LTR	ERV1	461.9	0.56	0.14	3.97	619	355	7.32239e-05	0.000980863
	MER90a	LTR	ERV1	525.28	0.53	0.13	3.96	694	410	7.36889e-05	0.000984911
	MER92B	LTR	ERV1	329.5	0.72	0.18	3.96	469	236	7.65084e-05	0.00101856
	LTR19A	LTR	ERV1	184.3	0.83	0.21	3.95	271	121	7.88609e-05	0.0010474
	LTR25-int	LTR	ERV1	370.15	0.59	0.15	3.94	494	276	8.18834e-05	0.00108231
	MER61A	LTR	ERV1	170.32	0.78	0.2	3.93	243	113	8.51439e-05	0.00111853
	LTR1B	LTR	ERV1	124.62	0.87	0.22	3.93	190	78	8.5316e-05	0.00111992
	HERVK9-int	LTR	ERVK	1787.58	0.35	0.09	3.92	2209	1509	8.9422e-05	0.00116643
	MER89-int	LTR	ERV1	161.03	0.81	0.21	3.92	239	106	8.9358e-05	0.00116643
	LTR46-int	LTR	ERV1	40.31	1.03	0.26	3.9	73	16	9.52027e-05	0.00123503
	HUERS-P3-int	LTR	ERV1	808.42	0.46	0.12	3.9	1034	654	9.75783e-05	0.00125926
	ERVL-int	LTR	ERVL	335.79	0.68	0.17	3.9	472	245	9.8192e-05	0.0012634
	HERVS71-int	LTR	ERV1	164.66	0.78	0.2	3.86	244	110	0.000115663	0.00144706
	MER21A	LTR	ERVL	929.78	0.45	0.12	3.85	1189	758	0.000118483	0.00147719
	MER74B	LTR	ERVL	375.32	0.6	0.16	3.85	513	284	0.000119449	0.00148813
	LTR54	LTR	ERV1	280.27	0.67	0.17	3.84	390	204	0.000124399	0.00153845
	LTR48B	LTR	ERV1	329.74	0.64	0.17	3.83	453	245	0.000127406	0.00156874
	MER110	LTR	ERV1	126.16	0.85	0.22	3.83	192	80	0.00012964	0.00159161
	MLT1G3	LTR	ERVL-MaLR	837.68	0.51	0.13	3.82	1094	669	0.000131477	0.00160705
	MER110A	LTR	ERV1	167.61	0.79	0.21	3.82	247	112	0.000131206	0.00160705
	PABL_B-int	LTR	ERV1	135.27	0.82	0.21	3.82	206	86	0.000131546	0.00160705
	LTR12B	LTR	ERV1	90.66	0.92	0.24	3.82	148	51	0.00013163	0.00160705
	LTR33C	LTR	ERVL	198.6	0.73	0.19	3.82	285	138	0.000134908	0.00164023
	MLT1H1-int	LTR	ERVL-MaLR	77.71	0.93	0.24	3.79	128	43	0.000153563	0.00182507
	LTR10F	LTR	ERV1	180.25	0.72	0.19	3.77	254	123	0.000161628	0.00191067
	MER67A	LTR	ERV1	100.11	0.86	0.23	3.77	154	61	0.0001628	0.00192113
	THE1A-int	LTR	ERVL-MaLR	2602.54	0.36	0.09	3.77	3241	2214	0.000163181	0.00192364
	LTR51	LTR	ERV1	101.82	0.87	0.23	3.76	154	62	0.000168038	0.00196945
	MLT1C-int	LTR	ERVL-MaLR	160.35	0.75	0.2	3.76	231	108	0.000168845	0.00197524
	LTR41	LTR	ERVL	332.45	0.64	0.17	3.75	460	248	0.000175905	0.00205072
	LTR52	LTR	ERVL	238.46	0.69	0.18	3.75	337	171	0.000179212	0.00208496
	LTR7Y	LTR	ERV1	64.68	0.95	0.26	3.74	109	34	0.000183153	0.00212204
	MER68	LTR	ERVL	753.52	0.45	0.12	3.73	967	612	0.000191906	0.00221131
	LTR37A	LTR	ERV1	360.34	0.58	0.16	3.71	486	275	0.000205814	0.00233962
	MLT1J1-int	LTR	ERVL-MaLR	219.85	0.66	0.18	3.71	303	156	0.000208936	0.00236873
	ERV24_Prim-int	LTR	ERV1	97.27	0.87	0.24	3.7	149	59	0.000214942	0.00243136
	PRIMA41-int	LTR	ERV1	242.29	0.66	0.18	3.69	337	176	0.000224835	0.00252496
	MER61B	LTR	ERV1	126.51	0.82	0.22	3.69	193	81	0.000224959	0.00252496
	MER65C	LTR	ERV1	192.13	0.72	0.2	3.68	269	133	0.000229491	0.00256382
	MER34-int	LTR	ERV1	175.79	0.74	0.2	3.68	250	121	0.000230911	0.00257464
	MSTA	LTR	ERVL-MaLR	7014.18	0.64	0.17	3.68	9707	5175	0.00023457	0.00260511
	LTR54B	LTR	ERV1	185.57	0.7	0.19	3.67	267	129	0.000239147	0.00265071
	MLT1G	LTR	ERVL-MaLR	785.55	0.5	0.14	3.67	1027	631	0.000244993	0.00270133
	MLT1M	LTR	ERVL-MaLR	721.07	0.5	0.14	3.63	945	578	0.000284118	0.00307645
	LTR33A_	LTR	ERVL	531.25	0.57	0.16	3.61	724	413	0.000307049	0.00329517
	LTR56	LTR	ERV1	280.33	0.59	0.16	3.61	379	209	0.000310954	0.00332861
	MamGypsy2-I	LTR	Gypsy	784.13	0.47	0.13	3.6	1017	636	0.000319348	0.00340121
	HERVK11-int	LTR	ERVK	227.55	0.65	0.18	3.59	313	165	0.000330589	0.00350105
	MER50B	LTR	ERV1	187.3	0.71	0.2	3.58	270	132	0.000348978	0.00365453
	LTR16D	LTR	ERVL	238.12	0.68	0.19	3.57	333	172	0.000353454	0.0036991
	MSTB	LTR	ERVL-MaLR	2959.56	0.66	0.18	3.57	4132	2158	0.000356259	0.00372385
	LTR14C	LTR	ERVK	46.33	0.92	0.26	3.54	77	23	0.000396706	0.00408573
	MamRep1151	LTR?	MamRep1151?	196.59	0.67	0.19	3.53	275	141	0.000412226	0.00420725
	MSTA1	LTR	ERVL-MaLR	195.86	0.68	0.19	3.53	274	140	0.000412637	0.0042089
	LTR33B	LTR	ERVL	340.52	0.57	0.16	3.52	456	261	0.000426788	0.00434013
	LTR9A1	LTR	ERV1	103.45	0.83	0.24	3.51	160	65	0.000443038	0.00448915
	LTR37-int	LTR	ERV1	373.23	0.56	0.16	3.51	505	288	0.000443798	0.00449415
	LTR23	LTR	ERV1	190.16	0.66	0.19	3.51	267	136	0.000448618	0.00453874
	LTR10A	LTR	ERV1	129.58	0.77	0.22	3.51	195	86	0.000448738	0.00453874
	MLT1E1	LTR	ERVL-MaLR	249.13	0.6	0.17	3.48	341	185	0.000492824	0.00491688
	MER87B	LTR	ERV1	33.84	0.92	0.26	3.48	62	14	0.000509802	0.00506531
	MLT1H2-int	LTR	ERVL-MaLR	121.95	0.75	0.22	3.47	180	80	0.000518443	0.00513907
	HERVFH19-int	LTR	ERV1	59.22	0.89	0.26	3.46	100	32	0.000534382	0.00527229
	MER51B	LTR	ERV1	197.46	0.69	0.2	3.44	288	140	0.000571454	0.0055923
	MER34B	LTR	ERV1	131.73	0.74	0.22	3.44	194	89	0.000586029	0.00571506
	MSTD-int	LTR	ERVL-MaLR	662.29	0.42	0.12	3.43	845	542	0.000597175	0.00580697
	LTR16B	LTR	ERVL	283.97	0.58	0.17	3.42	379	215	0.000628448	0.00606219
	MER83	LTR	ERV1	221.3	0.62	0.18	3.4	304	163	0.000669679	0.00640501
	MamGypLTR3	LTR	Gypsy	135.25	0.73	0.21	3.4	200	92	0.000675029	0.00644523
	HERVH-int	LTR	ERV1	2203.42	0.87	0.26	3.39	4213	733	0.000710446	0.00673766
	MER101-int	LTR	ERV1	336.48	0.54	0.16	3.38	456	260	0.000737668	0.00695286
	MER65D	LTR	ERV1	132.73	0.73	0.22	3.37	198	90	0.0007566	0.00709959
	LTR102_Mam	LTR	ERVL	105.06	0.79	0.24	3.37	163	67	0.000760717	0.00712634
	LTR80A	LTR	ERVL	116.43	0.75	0.22	3.37	171	77	0.000761693	0.00713153
	LTR10D	LTR	ERV1	127.69	0.74	0.22	3.35	189	86	0.000821681	0.00762132
	HERVE-int	LTR	ERV1	509.07	0.47	0.14	3.34	665	410	0.000845845	0.0077898
	LTR71A	LTR	ERV1	124.45	0.73	0.22	3.32	180	84	0.000885112	0.00808964
	LTR17	LTR	ERV1	316.46	0.55	0.17	3.32	428	244	0.000892447	0.00814213
	MER57B1	LTR	ERV1	292.54	0.55	0.17	3.32	389	225	0.000914068	0.00830484
	LTR81B	LTR	Gypsy	271	0.58	0.17	3.31	375	204	0.000933275	0.00845659
	LTR45B	LTR	ERV1	90.37	0.77	0.23	3.31	136	57	0.000935116	0.00846418
	THE1B	LTR	ERVL-MaLR	7641.94	0.58	0.18	3.3	10368	5812	0.000964143	0.00868037
	LTR82B	LTR	ERVL	289.29	0.54	0.17	3.29	383	222	0.00101502	0.00907073
	MER52A	LTR	ERV1	1404.91	0.4	0.12	3.28	1784	1180	0.00102661	0.00916945
	MER76	LTR	ERVL	235.27	0.6	0.18	3.28	323	176	0.00103838	0.00925499
	MER50-int	LTR	ERV1	160.96	0.67	0.2	3.27	231	114	0.00107236	0.00948271
	MamRep1527	LTR	MamRep1527	221.3	0.59	0.18	3.27	301	165	0.00108674	0.0095798
	HERVP71A-int	LTR	ERV1	244.59	0.6	0.19	3.26	344	183	0.0011214	0.0098288
	MER4A	LTR	ERV1	487.58	0.44	0.13	3.26	624	393	0.00112692	0.0098568
	LTR84b	LTR	ERVL	318.35	0.51	0.16	3.26	417	247	0.0011266	0.0098568
	LTR24C	LTR	ERV1	95.74	0.76	0.23	3.25	146	61	0.00114492	0.00997283
	HUERS-P2-int	LTR	ERV1	103.71	0.74	0.23	3.25	151	68	0.00115952	0.0100688
	MER90	LTR	ERV1	279.45	0.57	0.18	3.23	383	214	0.00121893	0.010493
	MER41C	LTR	ERV1	207.85	0.61	0.19	3.23	285	154	0.00122343	0.0105264
	LTR1D	LTR	ERV1	202	0.6	0.19	3.18	277	150	0.00145826	0.0122229
	MER34C2	LTR	ERV1	192.52	0.61	0.19	3.18	265	142	0.00145972	0.0122291
	MLT2E	LTR	ERVL	59.52	0.83	0.26	3.18	96	33	0.00149032	0.0124422
	MER34A1	LTR	ERV1	179.82	0.63	0.2	3.16	255	131	0.00159841	0.0132333
	LTR28B	LTR	ERV1	126.22	0.69	0.22	3.16	186	87	0.00160145	0.013252
	MLT1E	LTR	ERVL-MaLR	236.19	0.56	0.18	3.14	318	180	0.00166229	0.013675
	LTR88c	LTR	Gypsy	300.48	0.52	0.16	3.13	393	234	0.00172753	0.0141703
	MER67C	LTR	ERV1	527.84	0.41	0.13	3.12	668	431	0.00182503	0.0148244
	MER66B	LTR	ERV1	448.89	0.5	0.16	3.1	604	358	0.00192803	0.0155021
	LTR31	LTR	ERV1	84.12	0.77	0.25	3.1	130	53	0.00192847	0.0155021
	LTR27	LTR	ERV1	59.39	0.79	0.26	3.09	93	35	0.00200224	0.0159885
	HERVK-int	LTR	ERVK	1325.77	0.3	0.1	3.09	1617	1140	0.00201718	0.0160775
	LTR5A	LTR	ERVK	874.81	0.34	0.11	3.09	1077	734	0.0020231	0.016117
	LTR80B	LTR	ERVL	177.09	0.6	0.19	3.08	244	131	0.00208018	0.0164861
	MER51A	LTR	ERV1	414.49	0.45	0.15	3.07	538	335	0.00210943	0.0167023
	LTR62	LTR	ERVL	109.21	0.7	0.23	3.07	156	74	0.0021218	0.0167766
	LTR26	LTR	ERV1	144.09	0.69	0.22	3.07	217	100	0.00214633	0.016923
	HERVIP10FH-int	LTR	ERV1	404.84	0.8	0.26	3.05	669	218	0.00225417	0.0176333
	MER70A	LTR	ERVL	117.88	0.66	0.22	3.05	169	82	0.00231823	0.0180508
	MER51C	LTR	ERV1	144.98	0.62	0.21	3.04	201	104	0.00238657	0.0184636
	LTR40a	LTR	ERVL	765.14	0.38	0.12	3.04	959	643	0.00239108	0.0184816
	PABL_A-int	LTR	ERV1	121.38	0.68	0.22	3.03	176	85	0.00244991	0.0188759
	LTR35B	LTR	ERV1	40.19	0.8	0.26	3.02	63	21	0.00252997	0.0193865
	MER77	LTR	ERVL	526.98	0.44	0.15	2.98	684	433	0.00285191	0.0214211
	LTR18B	LTR	ERVL	135.14	0.64	0.21	2.98	190	97	0.0028526	0.0214211
	MER84	LTR	ERV1	57.81	0.76	0.25	2.98	92	34	0.00288327	0.021613
	MER11D	LTR	ERVK	217.63	0.53	0.18	2.98	289	165	0.00292256	0.0218538
	LTR38B	LTR	ERV1	67.6	0.74	0.25	2.98	101	41	0.00291993	0.0218538
	LTR38C	LTR	ERV1	25.88	0.78	0.26	2.97	45	11	0.00302485	0.0225442
	LTR22B1	LTR	ERVK	43.68	0.77	0.26	2.93	71	24	0.003356	0.0245955
	LTR14A	LTR	ERVK	35.4	0.78	0.26	2.93	59	18	0.00336315	0.0246198
	LTR10G	LTR	ERV1	54.54	0.75	0.26	2.92	82	31	0.00348221	0.0252722
	MER34	LTR	ERV1	317.46	0.51	0.17	2.92	415	251	0.00351524	0.0254791
	MER110-int	LTR	ERV1	107.35	0.66	0.23	2.92	153	75	0.0035495	0.0256613
	LTR65	LTR	ERV1	152.69	0.59	0.2	2.91	208	112	0.00356224	0.0257314
	LTR2	LTR	ERV1	930.61	0.35	0.12	2.91	1161	793	0.00362819	0.0261072
	LTR28C	LTR	ERV1	153.04	0.61	0.21	2.9	219	112	0.0037514	0.0268336
	MER34C_	LTR	ERV1	117.06	0.64	0.22	2.89	168	82	0.0038296	0.0272315
	LTR55	LTR	ERVL	156.61	0.59	0.2	2.89	218	116	0.00386694	0.0274507
	MLT1F2-int	LTR	ERVL-MaLR	322.15	0.47	0.16	2.88	413	257	0.00400455	0.0282111
	MER41D	LTR	ERV1	115.21	0.64	0.22	2.88	166	81	0.00400357	0.0282111
	MLT2B5	LTR	ERVL	93.44	0.67	0.23	2.86	138	64	0.00421349	0.0293917
	LTR38	LTR	ERV1	43.62	0.75	0.26	2.86	71	25	0.0042279	0.0294679
	LTR1E	LTR	ERV1	201.66	0.54	0.19	2.85	272	155	0.00438841	0.0304483
	LTR1A1	LTR	ERV1	138.15	0.64	0.22	2.85	200	100	0.00441307	0.0305817
	MER65-int	LTR	ERV1	283.58	0.51	0.18	2.84	385	223	0.00446317	0.0308529
	LTR1B1	LTR	ERV1	43.55	0.75	0.26	2.83	76	24	0.00461054	0.0317287
	LTR10C	LTR	ERV1	284.07	0.5	0.18	2.82	374	225	0.00482193	0.0328885
	LTR6B	LTR	ERV1	77.9	0.69	0.24	2.81	117	52	0.00489385	0.0332715
	LTR28	LTR	ERV1	76.27	0.69	0.25	2.79	111	50	0.00524255	0.035091
	HERVL66-int	LTR	ERVL	69.93	0.68	0.25	2.79	104	45	0.00534036	0.0356467
	LTR13	LTR	ERVK	900.71	0.31	0.11	2.79	1095	772	0.00534702	0.0356771
	PABL_A	LTR	ERV1	202.98	0.52	0.19	2.76	273	157	0.00586283	0.0383309
	HERVL18-int	LTR	ERVL	219.83	0.49	0.18	2.75	288	171	0.00603487	0.0392278
	HERVL74-int	LTR	ERVL	183.14	0.54	0.2	2.73	239	138	0.00641529	0.0412873
	LTR2752	LTR	ERV1	102.85	0.62	0.23	2.72	147	73	0.00646948	0.0416043
	MER66A	LTR	ERV1	103.41	0.65	0.24	2.72	151	72	0.0066002	0.0421878
	MLT1F-int	LTR	ERVL-MaLR	283.02	0.45	0.17	2.71	371	227	0.00665399	0.0424223
	MER57D	LTR	ERV1	73.72	0.66	0.24	2.71	109	49	0.00668216	0.0425185
	MER70B	LTR	ERVL	49.57	0.7	0.26	2.71	77	30	0.006748	0.0428567
	PRIMA4_LTR	LTR	ERV1	85.11	0.65	0.24	2.71	119	58	0.00675173	0.0428642
	HERVE_a-int	LTR	ERV1	395.22	0.41	0.15	2.71	504	326	0.00680495	0.0430591
	LTR43B	LTR	ERV1	42.1	0.71	0.26	2.7	65	24	0.00699586	0.0440332
	HUERS-P3b-int	LTR	ERV1	343.64	0.45	0.17	2.69	450	280	0.00724174	0.0451766
	LTR10B	LTR	ERV1	29.42	0.71	0.26	2.68	49	15	0.00727558	0.0453351
	LTR15	LTR	ERV1	98.23	0.61	0.23	2.68	137	69	0.00739307	0.0459677
	LTR84a	LTR	ERVL	120.61	0.59	0.22	2.68	169	88	0.00745721	0.0462643
	MER73	LTR	ERVL	72.44	0.66	0.25	2.67	112	48	0.00760882	0.0470148
	MamGypsy2-LTR	LTR	Gypsy	133.99	0.56	0.21	2.66	183	99	0.00792163	0.0485919
	LTR27E	LTR	ERV1	82.59	0.66	0.25	2.66	122	56	0.00792795	0.0486131
	MER57C2	LTR	ERV1	72.35	0.65	0.25	2.65	106	49	0.0081602	0.0497201
	AluYj4	SINE	Alu	1325.9	0.95	0.12	7.79	1975	867	6.93353e-15	5.32022e-13
	AluYa5	SINE	Alu	1252.42	0.87	0.12	7.12	1847	847	1.04808e-12	6.36427e-11
	AluYh3	SINE	Alu	780.63	0.85	0.14	5.91	1156	530	3.46499e-09	1.24984e-07
	AluJr	SINE	Alu	44793.6	0.46	0.08	5.53	57485	36644	3.20323e-08	9.69062e-07
	AluJb	SINE	Alu	69441.3	0.47	0.09	5.48	89449	56640	4.2206e-08	1.26326e-06
	AluJo	SINE	Alu	38344.7	0.45	0.08	5.4	49088	31468	6.78545e-08	1.96139e-06
	FLAM_C	SINE	Alu	7886.78	0.43	0.08	5.2	9961	6525	1.99153e-07	5.27771e-06
	AluSq10	SINE	Alu	734.68	0.69	0.13	5.16	1038	536	2.44423e-07	6.36745e-06
	AluSq4	SINE	Alu	856.04	0.7	0.14	5.14	1201	628	2.76928e-07	7.0938e-06
	AluYk3	SINE	Alu	339.14	0.89	0.18	5.04	513	222	4.77715e-07	1.14971e-05
	MIR	SINE	MIR	64368.7	0.36	0.07	4.86	79642	54721	1.16501e-06	2.52784e-05
	AluJr4	SINE	Alu	10893.6	0.42	0.09	4.82	13790	9074	1.40183e-06	2.98792e-05
	MIRb	SINE	MIR	83065.9	0.35	0.07	4.81	102626	70731	1.51917e-06	3.21771e-05
	MIRc	SINE	MIR	36051.3	0.34	0.07	4.69	44517	30790	2.77598e-06	5.54573e-05
	FRAM	SINE	Alu	2997.56	0.42	0.09	4.68	3785	2479	2.8856e-06	5.73755e-05
	AluYk4	SINE	Alu	313.35	0.82	0.18	4.65	468	211	3.25034e-06	6.35058e-05
	FLAM_A	SINE	Alu	5143.57	0.4	0.09	4.61	6469	4307	3.9644e-06	7.53496e-05
	AluYb8	SINE	Alu	697.75	0.65	0.14	4.51	979	521	6.45595e-06	0.000114719
	AluYe5	SINE	Alu	416.21	0.69	0.16	4.31	590	303	1.6076e-05	0.00025821
	AluYa8	SINE	Alu	84.89	1.02	0.24	4.25	137	45	2.16944e-05	0.000336912
	Alu	SINE	Alu	647.79	0.52	0.12	4.24	855	505	2.25714e-05	0.000348607
	MIR3	SINE	MIR	30636.4	0.32	0.08	4.23	37515	26441	2.38003e-05	0.000362938
	AluYk2	SINE	Alu	229.11	0.79	0.2	3.94	339	156	8.02748e-05	0.00106451
	MIR1_Amn	SINE	MIR	3871.07	0.32	0.08	3.93	4742	3324	8.51295e-05	0.00111853
	FAM	SINE	Alu	2097.91	0.32	0.09	3.38	2567	1808	0.000721645	0.00682088
	AluSx1	SINE	Alu	55363.9	0.6	0.18	3.25	76406	41589	0.0011467	0.00997809
	AluYc3	SINE	Alu	200.75	0.61	0.19	3.23	275	148	0.00121771	0.0104878
	AluYb9	SINE	Alu	69.4	0.81	0.25	3.2	106	41	0.00136755	0.0116242
	AluY	SINE	Alu	40776.3	0.68	0.21	3.19	58902	28809	0.0014213	0.0119845
	AluSc5	SINE	Alu	2799.56	0.63	0.2	3.16	3933	2056	0.00156058	0.0129646
	AluYg6	SINE	Alu	268.33	0.54	0.17	3.13	361	207	0.00176156	0.0144004
	AluYi6	SINE	Alu	143.47	0.66	0.21	3.09	206	102	0.00199634	0.015949
	AluSq2	SINE	Alu	28766.3	0.56	0.18	3.08	39124	22082	0.00207657	0.016466
	AluSg7	SINE	Alu	3983.62	0.59	0.19	3.05	5546	2980	0.00231356	0.0180227
	AluYm1	SINE	Alu	1687.39	0.69	0.23	3.03	2462	1159	0.00248266	0.0190905
	AluSx3	SINE	Alu	14317.8	0.58	0.19	3.03	19705	10799	0.00248483	0.0190926
	AluSq	SINE	Alu	8279.1	0.57	0.19	2.99	11430	6256	0.0027565	0.0208199
	AluSc	SINE	Alu	14949.8	0.58	0.2	2.98	20667	11252	0.00291551	0.0218353
	AluSc8	SINE	Alu	9600.82	0.59	0.2	2.92	13330	7167	0.00351952	0.0254992
	AluSz	SINE	Alu	50363.2	0.54	0.19	2.92	68248	38861	0.00354041	0.0256066
	AluSx	SINE	Alu	51857.5	0.53	0.18	2.88	69786	40344	0.00400748	0.0282111
	AluSx4	SINE	Alu	4832.73	0.57	0.2	2.86	6659	3661	0.00422022	0.0294265
	AluSp	SINE	Alu	24849.7	0.54	0.19	2.8	33958	19056	0.00503905	0.0341075
	AluSg4	SINE	Alu	3155.74	0.61	0.22	2.8	4442	2307	0.00512505	0.0345373
	AluSz6	SINE	Alu	23280.1	0.47	0.17	2.8	30578	18660	0.00517403	0.0347703
	AluYc	SINE	Alu	1312.32	0.64	0.24	2.69	1909	922	0.00719213	0.0449835
	AluSg	SINE	Alu	17440.2	0.55	0.2	2.68	23942	13299	0.00745309	0.0462557
	SVA_D	Retroposon	SVA	1755.11	0.52818	0.108193	4.88182	2292.5	1392.5	1.05114e-06	2.30145e-05
	SVA_C	Retroposon	SVA	360.354	0.673967	0.153342	4.3952	497.5	261.5	1.10671e-05	0.000184194
	SVA_A	Retroposon	SVA	607.532	0.569375	0.140292	4.05849	809.5	470.5	4.93915e-05	0.000694066
	SVA_B	Retroposon	SVA	602.194	0.537106	0.137848	3.89637	802	472.5	9.76467e-05	0.00125926
	TE Type	Class	Type	baseMean	log2FoldChange	lfcSE	stat	Average Test	Average Control	pvalue	padj
	SRP064478
	MER97b	DNA	hAT-Tip100	60.1826	0.712257	0.198065	3.59608	85.7143	45.25	0.000323049	0.0711401
	LTR25-int	LTR	ERV1	430.858	0.439101	0.122292	3.59061	546	374.25	0.000329911	0.0711401
	TE Type	Class	Type	baseMean	log2FoldChange	lfcSE	stat	Average Test	Average Control	pvalue	padj
	GSE76220
	MERX	DNA	TcMar-Tigger	69.5327	-0.620646	0.205429	-3.02121	63.8462	99	0.00251763	0.0400444
	Kanga1c	DNA	TcMar-Tc2	56.3845	0.664561	0.208325	3.19002	71.9231	44.25	0.00142261	0.0280655
	LTR61	LTR	ERV1	57.0854	1.25171	0.316799	3.95113	75.0769	29.75	7.77836e-05	0.00456115
	LTR10D	LTR	ERV1	128.093	1.23437	0.330426	3.73568	184	65.5	0.000187207	0.00809544
	MamRep1151	LTR?	LTR	51.245	0.883522	0.287142	3.07696	67.6154	35	0.00209126	0.0357266
	MER57F	LTR	ERV1	98.5905	0.701893	0.232445	3.0196	133	75.5	0.00253106	0.040225
	TE Type	Class	Type	baseMean	log2FoldChange	lfcSE	stat	Average Test	Average Control	pvalue	padj < 0.05
	GSE67196
	CEREBELLUM
	sALS vs Control
	NONE
	C9ALS vs Control
	NONE
	C9ALS vs sALS
	NONE
	FRONTAL CORTEX
	sALS vs Control
	HERVE-int	LTR	ERV1	323.372	-0.691311	0.175264	-3.94441	492.5	232.889	7.99975e-05	0.0287235
	LTR12B	LTR	ERV1	35.0317	0.700442	0.171244	4.09032	27.2	44.7778	4.3077e-05	0.026097
	LTR21B	LTR	ERV1	12.5907	0.874603	0.221699	3.945	7.5	17.4444	7.9801e-05	0.0287235
	C9ALS vs Control
	MamRep1879	DNA	hAT-Tip100	79.8355	0.563994	0.139087	4.05498	102	63.6667	5.01378e-05	0.0200147
	Charlie16a	DNA	hAT-Charlie	100.261	0.750413	0.19437	3.86075	135.25	70.6667	0.000113038	0.0314348
	Charlie17a	DNA	hAT-Charlie	35.7264	0.785832	0.21455	3.6627	49.375	23.8889	0.000249573	0.0447539
	Kanga1	DNA	TcMar-Tc2	18.1038	0.783126	0.218041	3.59165	25.375	12	0.000328597	0.0489926
	L1PA12	LINE	L1	282.283	0.867738	0.2256	3.84636	384.5	179.111	0.000119885	0.032606
	MER68B	LTR	ERVL	38.4702	0.778911	0.185917	4.18956	52.125	27.3333	2.79491e-05	0.0150378
	LTR47B4	LTR	ERVL	14.2425	1.01483	0.255637	3.96979	20.75	6.77778	7.19363e-05	0.0250764
	LTR46	LTR	ERV1	73.5304	0.758223	0.205581	3.6882	96	50.8889	0.000225844	0.0426691
	MER21-int	LTR	ERVL	59.7191	0.672867	0.187164	3.59507	78.625	43.3333	0.000324299	0.0489926
	FAM	SINE	Alu	434.571	0.55342	0.145093	3.81425	545.25	345.222	0.000136595	0.034702
	C9ALS vs sALS
	MER58D	DNA	hAT-Charlie	37.6057	1.03912	0.229217	4.53336	54.5	22.5	5.80536e-06	0.00453089
	Charlie7	DNA	hAT-Charlie	166.213	0.670331	0.1621	4.1353	211.875	132.3	3.54494e-05	0.0103017
	MER113B	DNA	hAT-Charlie	20.5528	0.902078	0.235876	3.82438	28.375	13.1	0.000131101	0.0165159
	Charlie9	DNA	hAT-Charlie	54.7466	0.739244	0.19497	3.79157	72.75	40.7	0.000149696	0.0166228
	Charlie15a	DNA	hAT-Charlie	223.537	0.551186	0.152471	3.61502	271.375	185.5	0.000300324	0.0195547
	Tigger5b	DNA	TcMar-Tigger	109.368	0.704206	0.194898	3.61321	139.875	83	0.000302426	0.0195547
	Charlie16a	DNA	hAT-Charlie	103.954	0.732174	0.203562	3.59681	135.25	76.9	0.000322142	0.0199014
	Tigger2a	DNA	TcMar-Tigger	210.169	0.444351	0.124964	3.55582	253	187	0.000376795	0.0210355
	MER104	DNA	TcMar-Tc2	112.585	0.519531	0.146487	3.54661	139.125	94.4	0.000390227	0.0214983
	MER81	DNA	hAT-Blackjack	146.364	0.490932	0.138518	3.54417	177.125	127.9	0.000393854	0.0216069
	FordPrefect	DNA	hAT-Tip100	119.006	1.00475	0.286603	3.50572	161.375	63.8	0.00045537	0.0223992
	Tigger4a	DNA	TcMar-Tigger	262.396	0.584415	0.167992	3.47882	333.875	212.8	0.000503627	0.0234432
	MER44A	DNA	TcMar-Tigger	191.124	0.486959	0.141879	3.43223	230.125	164.5	0.000598648	0.0254352
	MER63C	DNA	hAT-Blackjack	114.73	0.39966	0.122192	3.27074	134.75	105.1	0.00107265	0.0308279
	MER63A	DNA	hAT-Blackjack	127.039	0.506718	0.156227	3.24347	153.375	107.7	0.00118082	0.0322417
	Cheshire	DNA	hAT-Charlie	83.8257	0.702197	0.216595	3.24199	107.125	61.6	0.001187	0.0322417
	MER112	DNA	hAT-Charlie	266.503	0.526107	0.164338	3.20137	327.875	226.8	0.00136776	0.0342878
	MER30	DNA	hAT-Charlie	237.398	0.574607	0.180377	3.18559	295.25	193	0.00144458	0.0351175
	MER47A	DNA	TcMar-Tigger	197.874	0.588937	0.18615	3.16378	246.375	156.6	0.00155734	0.035993
	Kanga1c	DNA	TcMar-Tc2	70.3714	0.53368	0.170356	3.13273	92.375	61.5	0.00173186	0.0372105
	MER45C	DNA	hAT-Tip100	26.0375	0.766721	0.244704	3.13326	34.375	17.6	0.00172877	0.0372105
	Charlie23a	DNA	hAT-Charlie	90.5661	0.657726	0.210135	3.13002	114.5	68.3	0.00174793	0.0372762
	Tigger7	DNA	TcMar-Tigger	178.12	0.591489	0.189873	3.11518	221.5	141.9	0.00183833	0.0377708
	MER105	DNA	hAT-Charlie	51.5963	0.749153	0.240898	3.10983	67.5	34.7	0.00187195	0.0380525
	Charlie4a	DNA	hAT-Charlie	203.277	0.611713	0.197871	3.09147	251.125	157.2	0.00199169	0.0386973
	MER58C	DNA	hAT-Charlie	143.31	0.694384	0.224973	3.08653	182.75	102.8	0.00202511	0.038884
	Tigger3	DNA	TcMar-Tigger	72.3231	0.684893	0.22229	3.08108	92.25	52.8	0.00206254	0.0392621
	MamRep38	DNA	hAT	183.293	0.411452	0.133639	3.07883	214.875	165.3	0.00207816	0.0392749
	MER58A	DNA	hAT-Charlie	788.458	0.55793	0.182709	3.05365	975.125	635	0.00226078	0.0407811
	Charlie22a	DNA	hAT-Charlie	42.7873	0.720992	0.236366	3.05032	55.875	29.7	0.00228595	0.0408887
	MER96B	DNA	hAT-Tip100	60.9627	0.678454	0.222628	3.04748	76.875	44.2	0.00230772	0.0409632
	MamRep4096	DNA	hAT-Tip100	29.0323	0.741609	0.244057	3.03868	38	20.1	0.0023762	0.0414268
	MamRep1879	DNA	hAT-Tip100	83.8975	0.510879	0.168811	3.02634	102	69.4	0.00247536	0.0422168
	MER20	DNA	hAT-Charlie	1086.5	0.567213	0.187933	3.01816	1334	873.4	0.00254317	0.0428315
	MER106B	DNA	hAT-Charlie	63.3488	0.764221	0.255516	2.99089	82.375	41.2	0.00278163	0.044217
	Charlie2a	DNA	hAT-Charlie	192.969	0.384486	0.128816	2.98476	228.375	175	0.00283799	0.0442465
	MER1A	DNA	hAT-Charlie	696.172	0.418234	0.140733	2.97183	829.625	615.5	0.00296027	0.0451288
	MER113	DNA	hAT-Charlie	200.979	0.613406	0.207239	2.9599	250.875	153	0.00307742	0.0458812
	MER44C	DNA	TcMar-Tigger	102.937	0.478149	0.162119	2.94936	123.75	86.7	0.00318431	0.0466275
	MER2	DNA	TcMar-Tigger	596.059	0.501536	0.170288	2.94522	718.625	497.1	0.00322723	0.0469072
	MER103C	DNA	hAT-Charlie	437.685	0.468354	0.160006	2.9271	524.25	370.6	0.00342141	0.0477123
	Tigger17a	DNA	TcMar-Tigger	162.26	0.635996	0.219214	2.90126	204.875	119	0.00371671	0.0488306
	OldhAT1	DNA	hAT-Ac	187.17	0.420703	0.145466	2.8921	219.625	168.6	0.00382671	0.0493729
	L1PA12	LINE	L1	286.9	0.883497	0.249832	3.53637	384.5	182	0.000405673	0.0217854
	X9_LINE	LINE	L1	20.1382	0.665604	0.193358	3.44234	26.25	16.2	0.000576706	0.0250055
	L1ME2z	LINE	L1	443.447	0.447745	0.130307	3.43607	531.125	389.9	0.000590213	0.0252637
	CR1_Mam	LINE	CR1	87.1399	0.655499	0.192909	3.39796	108.625	67.7	0.000678896	0.0267331
	Penelope1_Vert	LINE	Penelope	37.9524	0.559105	0.167762	3.33273	47.75	31.8	0.000859988	0.0287327
	L1MDb	LINE	L1	23.8296	0.66035	0.201564	3.27613	30.25	18.5	0.0010524	0.0308279
	X7C_LINE	LINE	CR1	25.512	0.753918	0.235264	3.20457	34.375	17.7	0.00135266	0.0342022
	L1ME3D	LINE	L1	271.583	0.659825	0.20665	3.19297	342	201.8	0.0014082	0.0346703
	L1M6	LINE	L1	220.296	0.528443	0.166696	3.1701	268.625	184.3	0.00152389	0.035716
	L1ME2	LINE	L1	1009.97	0.538654	0.170387	3.16135	1219.5	828.6	0.00157041	0.0361551
	L2-3_Crp	LINE	L2	85.0187	0.542031	0.171666	3.15747	104.25	72.3	0.00159146	0.0362599
	L1ME4c	LINE	L1	566.894	0.447741	0.142463	3.14286	677.875	490.5	0.00167308	0.0365084
	L2b	LINE	L2	6521.37	0.486824	0.156467	3.11134	7832	5535.5	0.00186238	0.0379842
	L1M7	LINE	L1	129.751	0.740858	0.239974	3.08724	169.875	88.5	0.00202027	0.038884
	L1PB3	LINE	L1	164.616	0.652096	0.212163	3.07357	207.25	124	0.00211516	0.0395878
	L1M3d	LINE	L1	19.6687	0.858809	0.282935	3.03535	26	11.1	0.00240255	0.0416999
	L1ME3	LINE	L1	759.505	0.51319	0.170276	3.01387	933.25	629.9	0.00257942	0.0430457
	L1M2a	LINE	L1	18.4436	0.853692	0.28533	2.99194	25.125	10.2	0.00277208	0.044217
	L1MB4	LINE	L1	1188.31	0.31922	0.108152	2.9516	1372.12	1107.6	0.00316132	0.046407
	L2a	LINE	L2	12834.3	0.421171	0.145672	2.89124	15149	11316.1	0.00383731	0.0493894
	LTR1B1	LTR	ERV1	28.9227	1.1858	0.261987	4.52618	43.5	14.3	6.00594e-06	0.00453623
	MLT1-int	LTR	ERVL-MaLR	19.7698	1.02701	0.24529	4.18693	29	11.8	2.82756e-05	0.00959487
	PRIMA4_LTR	LTR	ERV1	41.7597	0.95005	0.23551	4.03402	57	26.5	5.48313e-05	0.0117782
	HERVH-int	LTR	ERV1	410.616	0.731313	0.18187	4.02107	520.25	319.5	5.79336e-05	0.0123314
	MER65D	LTR	ERV1	41.3504	0.834623	0.210873	3.95794	54.25	29.7	7.55976e-05	0.0141884
	LTR46	LTR	ERV1	72.8405	0.874441	0.224273	3.899	96	49.4	9.65916e-05	0.0151785
	LTR81C	LTR	Gypsy	15.098	0.886922	0.247854	3.5784	20.375	9.9	0.000345707	0.020465
	LTR48	LTR	ERV1	89.2972	0.662532	0.186253	3.55716	113.625	70.5	0.000374888	0.0210355
	HERV35I-int	LTR	ERV1	22.9551	0.801339	0.228463	3.50752	31	15.9	0.000452306	0.0223896
	LTR7C	LTR	ERV1	108.221	0.620278	0.177394	3.49661	136	86.9	0.000471213	0.0226569
	LTR3A	LTR	ERVK	40.8936	0.774524	0.221992	3.48897	54.125	29.1	0.000484891	0.0231227
	LTR62	LTR	ERVL	59.5215	0.771684	0.231315	3.33607	77.875	41.6	0.000849724	0.0287287
	HERVIP10FH-int	LTR	ERV1	45.6009	0.775073	0.233094	3.32515	59.125	31.7	0.000883713	0.0289653
	LTR21A	LTR	ERV1	38.5604	0.648007	0.197817	3.27579	48.5	30.4	0.00105366	0.0308279
	LTR6B	LTR	ERV1	32.282	0.842263	0.260906	3.22823	42.75	19.8	0.0012456	0.0329915
	LTR45B	LTR	ERV1	26.4992	0.673725	0.209358	3.21805	34.25	20.3	0.00129066	0.0334657
	MER51-int	LTR	ERV1	88.1086	0.474839	0.148434	3.19898	106.625	76.4	0.00137916	0.0343733
	LTR106_Mam	LTR	LTR106_Mam	23.561	0.789784	0.248396	3.17953	31.75	15.4	0.00147513	0.0352146
	MER77B	LTR	ERVL	94.8014	0.589835	0.185896	3.17293	117.5	75.1	0.00150908	0.0354399
	HERVK22-int	LTR	ERVK	34.1745	0.697379	0.219783	3.17303	45.375	25.7	0.00150856	0.0354399
	MER4-int	LTR	ERV1	197.453	0.534813	0.169028	3.16405	238.875	162.2	0.00155588	0.035993
	MER57B1	LTR	ERV1	131.713	0.650356	0.205958	3.15771	164.375	100.3	0.00159015	0.0362599
	MER9a2	LTR	ERVK	109.645	0.423731	0.134472	3.15108	132.75	96.6	0.00162668	0.0364112
	LTR65	LTR	ERV1	27.4282	0.547448	0.174732	3.13308	35	23.8	0.00172984	0.0372105
	MER52A	LTR	ERV1	190.252	0.509683	0.163191	3.12324	228	162.4	0.00178872	0.0375675
	MER21-int	LTR	ERVL	60.5344	0.694914	0.223461	3.10978	78.625	44.1	0.00187225	0.0380525
	LTR86A2	LTR	ERVL	25.653	0.824284	0.26534	3.10652	33.625	15.5	0.00189306	0.038106
	ERVL-B4-int	LTR	ERVL	315.416	0.406425	0.130935	3.10401	368.875	286.1	0.00190916	0.0382388
	MER9a3	LTR	ERVK	129.619	0.510432	0.164638	3.10033	158.875	108.2	0.00193303	0.0384417
	MER39	LTR	ERV1	188.466	0.355073	0.114737	3.09466	217.75	176.1	0.00197038	0.0386973
	MER70-int	LTR	ERVL	43.8644	0.542648	0.175447	3.09294	56.625	37.3	0.00198185	0.0386973
	MSTB1	LTR	ERVL-MaLR	292.534	0.565265	0.184741	3.05978	364.5	235.6	0.00221499	0.0404539
	LTR24	LTR	ERV1	119.403	0.555821	0.183424	3.03026	145.5	96.1	0.00244344	0.0419736
	PRIMA41-int	LTR	ERV1	66.6171	0.638084	0.213632	2.98683	83.625	51.6	0.00281884	0.044217
	MLT1G1	LTR	ERVL-MaLR	290.102	0.470393	0.157526	2.98613	344.5	250.2	0.00282536	0.0442236
	THE1C	LTR	ERVL-MaLR	655.566	0.41108	0.138101	2.97667	766.625	581.3	0.002914	0.0447986
	LTR14	LTR	ERVK	71.1352	0.587612	0.197657	2.97289	86.75	55.9	0.00295013	0.0450966
	MER4D	LTR	ERV1	78.7453	0.474615	0.160592	2.95541	95	67.5	0.00312252	0.046214
	LTR2	LTR	ERV1	525.114	0.633473	0.215071	2.94541	655.625	387.9	0.00322528	0.0469072
	LTR16D2	LTR	ERVL	7.17263	0.792007	0.268996	2.94431	9.875	4.8	0.00323674	0.0469182
	LTR5B	LTR	ERVK	287.266	0.411791	0.14006	2.94011	341.125	251.9	0.00328099	0.0470148
	THE1C-int	LTR	ERVL-MaLR	159.404	0.419224	0.142612	2.93962	187.75	141.7	0.00328614	0.0470471
	MER61C	LTR	ERV1	9.73681	0.773891	0.263883	2.9327	13.125	6.2	0.00336028	0.0473107
	MLT1A1	LTR	ERVL-MaLR	676.335	0.276595	0.0945029	2.92684	770	644.2	0.0034242	0.0477125
	LTR47B4	LTR	ERVL	14.8503	0.865686	0.296645	2.91826	20.75	7	0.00351992	0.0481166
	MER51E	LTR	ERV1	53.8395	0.716506	0.245759	2.91548	68.75	37	0.00355142	0.0482325
	MSTD	LTR	ERVL-MaLR	559.574	0.353077	0.121657	2.90224	648.625	510.3	0.00370503	0.0488306
	LTR2B	LTR	ERV1	128.076	0.70762	0.243617	2.90464	165.25	86.1	0.0036767	0.0488306
	AluSq4	SINE	Alu	175.287	0.801252	0.230747	3.47243	231	117.1	0.000515767	0.023866
	AluYj4	SINE	Alu	218.888	0.757381	0.22082	3.42986	280.5	154.7	0.000603884	0.0254763
	MIR1_Amn	SINE	MIR	814.168	0.552877	0.16197	3.41345	993.25	676.2	0.000641454	0.0260295
	AluYh7	SINE	Alu	6.97311	0.965869	0.285519	3.38286	10.125	3.9	0.000717352	0.0271342
	AluYk2	SINE	Alu	52.1763	0.746523	0.234643	3.18153	66.875	37	0.00146501	0.0352146
	FAM	SINE	Alu	443.999	0.554871	0.175708	3.15792	545.25	361.8	0.00158897	0.0362599
	AluJr4	SINE	Alu	2219.12	0.649131	0.208908	3.10726	2785.75	1651.2	0.0018883	0.038106
	AluJo	SINE	Alu	10028.7	0.608763	0.200827	3.03128	12425.9	7690.7	0.0024352	0.0419557
	AluYh3a3	SINE	Alu	34.862	0.780482	0.257541	3.03052	45.625	22.3	0.00244137	0.0419693
	AluYa8	SINE	Alu	14.1302	0.843382	0.278593	3.0273	19.25	8.2	0.00246752	0.0421405
	AluJr	SINE	Alu	10342.6	0.617751	0.204168	3.0257	12836.6	7864.4	0.00248061	0.0422715
	AluSx4	SINE	Alu	1338.2	0.580725	0.193296	3.00433	1644.25	1045.5	0.00266169	0.0436425
	AluSp	SINE	Alu	6630.34	0.58616	0.195257	3.00199	8085.88	5203.6	0.00268222	0.0437756
	FLAM_A	SINE	Alu	1145.96	0.540855	0.180492	2.99655	1391.75	928.2	0.00273049	0.0441517
	AluY	SINE	Alu	9793.36	0.608544	0.204813	2.97122	12002.6	7517.9	0.00296623	0.0451862
	MIR	SINE	MIR	11034.4	0.465805	0.160394	2.90413	13177.4	9393	0.0036828	0.0488306
	AluSz	SINE	Alu	12274.8	0.596452	0.205973	2.89578	15075	9417.2	0.00378213	0.049117
	AluSq2	SINE	Alu	7338.5	0.588133	0.203199	2.89437	8988.25	5668.9	0.00379925	0.0492284
	AluSx1	SINE	Alu	13013.4	0.59931	0.207428	2.88925	15951.2	9981.7	0.00386164	0.0495704
	AluJb	SINE	Alu	15880.4	0.596033	0.206442	2.88717	19532.8	12163.4	0.00388724	0.0497082
	AluYa5	SINE	Alu	343.351	0.662256	0.229415	2.88672	427.625	246.9	0.00389286	0.049751
	MIR3	SINE	MIR	5981.09	0.400881	0.138966	2.88475	7014.25	5326.4	0.0039172	0.0498648
	TE Type	Class	Type	baseMean	log2FoldChange	lfcSE	stat	Average Test	Average Control	pvalue	padj < 0.05
	SRP098831- NeuroLINCS dbGaP Study phs001231
	SMA vs Control
	Charlie21a	DNA	hAT-Charlie	865.039	-1.07391	0.271849	-3.95038	536.333	1206.62	7.80261e-05	0.000851345
	UCON132b	DNA	hAT-Tip100	289.121	-0.342437	0.0920574	-3.71982	265.333	327.25	0.000199363	0.00185344
	Tigger13a	DNA	TcMar-Tigger	511.981	0.498755	0.0765956	6.51153	616.889	420.625	7.43873e-11	5.0138e-09
	MER20	DNA	hAT-Charlie	4206.44	0.315277	0.0523734	6.01978	4807.33	3742.5	1.74656e-09	8.63177e-08
	Tigger3c	DNA	TcMar-Tigger	516.725	0.374413	0.0635401	5.89255	602.111	447.125	3.80285e-09	1.69258e-07
	Tigger17	DNA	TcMar-Tigger	46.1823	1.14556	0.204495	5.6019	66.7778	26.875	2.12011e-08	7.45011e-07
	Charlie19a	DNA	hAT-Charlie	291.685	0.433191	0.083862	5.16552	345.444	245.625	2.39775e-07	6.08934e-06
	Charlie13b	DNA	hAT-Charlie	114.676	0.583581	0.113414	5.14559	141.444	90.625	2.66683e-07	6.67437e-06
	Tigger17a	DNA	TcMar-Tigger	645.638	0.318847	0.063692	5.00607	739.889	573.25	5.55513e-07	1.26107e-05
	Tigger9b	DNA	TcMar-Tigger	132.53	0.547568	0.110208	4.96852	161.667	105.875	6.74665e-07	1.50817e-05
	Charlie10a	DNA	hAT-Charlie	196.599	0.489153	0.100228	4.88039	235.111	161.125	1.05874e-06	2.22905e-05
	Kanga1a	DNA	TcMar-Tc2	144.255	0.415405	0.0853982	4.86433	169.889	123	1.14844e-06	2.3846e-05
	MER30	DNA	hAT-Charlie	792.741	0.347459	0.0765562	4.53861	917.889	695.625	5.66259e-06	9.38121e-05
	Charlie12	DNA	hAT-Charlie	21.3843	0.945782	0.210536	4.49227	28.8889	13.625	7.04692e-06	0.000112363
	Chap1_Mam	DNA	hAT-Charlie	168.86	0.382907	0.0868459	4.40904	196.556	144.25	1.03832e-05	0.000157261
	MamRep434	DNA	TcMar-Tigger	373.934	0.304501	0.0693083	4.39343	425.889	334.375	1.11578e-05	0.00016664
	MER113A	DNA	hAT-Charlie	311.271	0.329184	0.0752688	4.37344	354.444	273	1.22303e-05	0.000180571
	MER117	DNA	hAT-Charlie	1418.34	0.257045	0.0604819	4.24995	1584.11	1285.5	2.13815e-05	0.000289704
	Charlie22a	DNA	hAT-Charlie	195.092	0.467831	0.111804	4.18437	234.444	163.125	2.85962e-05	0.000369356
	Charlie1	DNA	hAT-Charlie	552.306	0.367093	0.0879672	4.17306	637.111	477.75	3.00529e-05	0.000384074
	MER91B	DNA	hAT-Tip100	324.319	0.338093	0.0822868	4.10872	375.333	286	3.97863e-05	0.000484025
	MERX	DNA	TcMar-Tigger	55.7107	0.588009	0.14389	4.08651	69.2222	44	4.37907e-05	0.000526404
	MER75	DNA	PiggyBac	194.842	0.510826	0.12703	4.0213	234.778	158.625	5.78782e-05	0.000661559
	Charlie23a	DNA	hAT-Charlie	177.383	0.374973	0.0936409	4.00437	206.889	153.25	6.21819e-05	0.000701719
	MER1B	DNA	hAT-Charlie	1343.47	0.363979	0.090941	4.00237	1568.89	1172.38	6.27118e-05	0.000706611
	ORSL	DNA	hAT-Tip100	219.313	0.341136	0.0854839	3.99065	252.667	192.25	6.58921e-05	0.000739035
	MER47A	DNA	TcMar-Tigger	802.331	0.199563	0.0502347	3.97262	885.778	747.125	7.1086e-05	0.000788837
	Tigger4b	DNA	TcMar-Tigger	942.162	0.221865	0.0559863	3.96285	1046.67	870.25	7.40595e-05	0.000815043
	MER6	DNA	TcMar-Tigger	223.881	0.428162	0.10822	3.95639	261.778	188.125	7.60894e-05	0.000834183
	MER47C	DNA	TcMar-Tigger	68.8001	0.522111	0.134778	3.87386	83.8889	56.125	0.000107127	0.00110782
	MER112	DNA	hAT-Charlie	1048.1	0.20843	0.0541045	3.85235	1156.67	971	0.000116988	0.00119755
	Tigger18a	DNA	TcMar-Tigger	200.028	0.302004	0.0786535	3.83967	228.667	179	0.000123198	0.00125249
	Charlie20a	DNA	hAT-Charlie	110.332	0.569	0.151062	3.76665	137.444	88.875	0.000165451	0.0015966
	Charlie7a	DNA	hAT-Charlie	200.626	0.27625	0.0736855	3.74904	226.111	180.25	0.00017751	0.00168522
	MER44D	DNA	TcMar-Tigger	109.056	0.472576	0.12845	3.67908	129.556	89.875	0.00023408	0.00211799
	MER105	DNA	hAT-Charlie	176.418	0.431681	0.117479	3.67453	210.889	149.5	0.000238284	0.00214662
	MER85	DNA	PiggyBac	137.431	0.453244	0.124604	3.63747	164.889	115.25	0.000275328	0.0024319
	Charlie2a	DNA	hAT-Charlie	483.037	0.384148	0.108982	3.52489	558.889	415.5	0.000423662	0.00349458
	Tigger3a	DNA	TcMar-Tigger	1787.96	0.297192	0.0857878	3.46427	2035	1603.25	0.000531678	0.00419771
	MER8	DNA	TcMar-Tigger	693.532	0.238215	0.0694115	3.43192	774.778	634.875	0.000599335	0.00463541
	HSMAR2	DNA	TcMar-Mariner	528.08	0.304419	0.0889189	3.42355	604.556	471.375	0.000618083	0.00475937
	MER46C	DNA	TcMar-Tigger	716.568	0.24653	0.0723429	3.4078	805	658	0.00065489	0.00498775
	MER2	DNA	TcMar-Tigger	2301.19	0.214598	0.0631092	3.40043	2551.78	2132.88	0.000672794	0.00510026
	MER135	DNA	MER135	109.618	0.375845	0.111666	3.36578	128	94.125	0.000763264	0.00565587
	Charlie16a	DNA	hAT-Charlie	395.901	0.251885	0.0751867	3.35013	443.556	361.5	0.000807744	0.0059211
	UCON78	DNA	DNA	10.2429	0.829278	0.249585	3.32262	13.7778	6.875	0.000891753	0.00639457
	MER2B	DNA	TcMar-Tigger	309.373	0.280674	0.0848833	3.30659	348.444	278.5	0.000944395	0.00667408
	MER102b	DNA	hAT-Charlie	980.706	0.266104	0.0804834	3.30633	1112.44	890.625	0.000945279	0.0066771
	Tigger3b	DNA	TcMar-Tigger	1471.62	0.277436	0.0850735	3.26114	1674.44	1332.12	0.00110967	0.00757536
	Tigger2a	DNA	TcMar-Tigger	622.595	0.2722	0.0841308	3.23544	702.556	561	0.00121457	0.00816405
	Tigger12c	DNA	TcMar-Tigger	273.687	0.347707	0.108198	3.21362	318.556	240	0.00131073	0.00870036
	MER1A	DNA	hAT-Charlie	992.714	0.30686	0.0969443	3.16532	1134.56	885.125	0.00154913	0.0099453
	MER44B	DNA	TcMar-Tigger	347.551	0.281657	0.0894107	3.15015	394.111	311.125	0.00163186	0.0103539
	MER113B	DNA	hAT-Charlie	72.1654	0.470925	0.150824	3.12235	87.5556	60.5	0.00179416	0.0111106
	Tigger16a	DNA	TcMar-Tigger	269.609	0.317071	0.103814	3.05423	311.667	239.375	0.0022564	0.0133135
	MER106A	DNA	hAT-Charlie	75.0819	0.37386	0.122708	3.04674	88	64.875	0.00231334	0.0135832
	Charlie6	DNA	hAT-Charlie	26.6128	0.612844	0.202068	3.03287	33.3333	20.375	0.00242244	0.0140783
	MER58B	DNA	hAT-Charlie	1908.31	0.23843	0.0788104	3.02537	2145.89	1745.5	0.00248333	0.014369
	Merlin1_HS	DNA	Merlin	58.799	0.703736	0.233754	3.01059	77.4444	43.125	0.00260744	0.0149338
	MER5A	DNA	hAT-Charlie	6076.34	0.210456	0.0708646	2.96983	6762.11	5626.38	0.00297964	0.0165293
	MER5C	DNA	hAT-Charlie	200.904	0.291191	0.0981409	2.96707	228	180.25	0.00300653	0.0166312
	MER63B	DNA	hAT-Blackjack	230.57	0.306764	0.103566	2.96201	263.556	205.75	0.00305637	0.0168621
	Charlie1b	DNA	hAT-Charlie	637.778	0.202122	0.0688085	2.93746	706.667	593.375	0.0033091	0.0179725
	MER81	DNA	hAT-Blackjack	367.17	0.209892	0.0716351	2.93001	407.111	338.5	0.0033895	0.018304
	ORSL-2b	DNA	hAT-Tip100	69.0681	0.354315	0.12138	2.91905	80.2222	60.125	0.00351094	0.0188121
	MamRep137	DNA	TcMar-Tigger	701.531	0.204297	0.0702361	2.90871	775	647.875	0.00362918	0.0192961
	Charlie8	DNA	hAT-Charlie	969.564	0.215668	0.0746668	2.88841	1069.33	892.75	0.00387195	0.0202598
	Looper	DNA	PiggyBac	178.144	0.367432	0.131041	2.80394	209	156.125	0.00504821	0.0248819
	Tigger5b	DNA	TcMar-Tigger	441.967	0.290083	0.104142	2.78546	501.889	395.375	0.00534522	0.026022
	MamRep38	DNA	hAT	257.846	0.211367	0.0761651	2.77511	286.111	239.125	0.00551828	0.0266564
	Charlie4a	DNA	hAT-Charlie	769.122	0.193129	0.0703702	2.74447	847.889	717	0.00606081	0.0285937
	MER6A	DNA	TcMar-Tigger	226.161	0.268153	0.0986183	2.7191	255.111	203.625	0.00654592	0.030369
	Tigger6b	DNA	TcMar-Tigger	42.9096	0.421042	0.154903	2.71811	51.3333	36.5	0.00656555	0.0304457
	hAT-16_Crp	DNA	hAT-Charlie	10.8442	0.762797	0.281897	2.70594	14.5556	7.375	0.00681116	0.0312809
	MER104	DNA	TcMar-Tc2	615.032	0.17093	0.0639485	2.67294	673.889	577.875	0.00751904	0.0339082
	MER45C	DNA	hAT-Tip100	47.6137	0.474521	0.17904	2.65036	57.4444	39.25	0.00804067	0.0357259
	Charlie26a	DNA	hAT-Charlie	52.0827	0.367687	0.138742	2.65015	60.4444	45.125	0.0080457	0.03573
	Tigger19a	DNA	TcMar-Tigger	1454.01	0.265092	0.100041	2.64983	1629.89	1317.62	0.0080532	0.0357544
	MER91C	DNA	hAT-Tip100	230.271	0.301473	0.113939	2.6459	264.556	204.25	0.0081473	0.0360412
	Tigger1a_Mars	DNA	TcMar-Tigger	5.49282	0.86225	0.326628	2.63985	7.88889	3.375	0.00829415	0.0365751
	MER45R	DNA	hAT-Tip100	27.0165	0.479807	0.181978	2.63662	32.3333	22	0.00837374	0.0368427
	MamRep137	DNA	TcMar	68.0407	0.358708	0.13638	2.63021	79.1111	59.125	0.00853329	0.0374099
	MER121	DNA	hAT	29.5884	0.458594	0.174387	2.62976	35.5556	24.625	0.00854459	0.0374426
	MER44C	DNA	TcMar-Tigger	185.74	0.285655	0.108713	2.6276	211.222	166.375	0.00859888	0.0376468
	MER5C1	DNA	hAT-Charlie	73.4753	0.380991	0.149516	2.54816	85.5556	62.75	0.0108294	0.0451612
	UCON55	DNA	TcMar-Tigger	65.0223	0.361107	0.142632	2.53174	76.1111	56.875	0.0113497	0.0468223
	MER94B	DNA	hAT-Blackjack	48.7001	0.333299	0.131904	2.52682	56.1111	42.875	0.01151	0.0473103
	Charlie15b	DNA	hAT-Charlie	419.876	0.166568	0.0661434	2.51829	459.444	396.875	0.0117927	0.0480815
	Tigger2b_Pri	DNA	TcMar-Tigger	324.019	0.308555	0.122713	2.51444	366.889	285.5	0.011922	0.0484537
	Tigger4a	DNA	TcMar-Tigger	1104.63	0.213055	0.0848658	2.51049	1233	1023.62	0.0120564	0.0488506
	L1MEg1	LINE	L1	229.23	-1.48577	0.313281	-4.7426	103.111	366.75	2.10994e-06	4.04157e-05
	L1PBa1	LINE	L1	121.307	0.606327	0.106333	5.70216	150.556	94.875	1.18299e-08	4.50843e-07
	L1MB3	LINE	L1	4415.29	0.334742	0.060938	5.49316	5070.78	3897.5	3.94811e-08	1.29282e-06
	L1MA5A	LINE	L1	500.353	0.551089	0.103638	5.31747	616.111	403.75	1.0522e-07	2.95176e-06
	CR1-L3A_Croc	LINE	CR1	50.3242	0.729714	0.142215	5.13105	64.8889	37.125	2.88127e-07	7.10189e-06
	L2b	LINE	L2	23725.1	0.278519	0.0562867	4.94823	26879.6	21407	7.48911e-07	1.64654e-05
	L1P3b	LINE	L1	302.755	1.00667	0.204182	4.93028	416.111	188.5	8.21108e-07	1.7799e-05
	L1ME4c	LINE	L1	1936.07	0.260633	0.0555501	4.69186	2176.11	1757.62	2.70732e-06	5.00589e-05
	L2c	LINE	L2	28648.3	0.264317	0.0576308	4.58639	32331.3	26012.5	4.50977e-06	7.76544e-05
	L1MB7	LINE	L1	6431.19	0.289613	0.0685931	4.22219	7288.22	5767.88	2.41937e-05	0.000321126
	HAL1	LINE	L1	5322.88	0.239335	0.0569668	4.20131	5950.56	4884	2.65377e-05	0.000346432
	L1MC5	LINE	L1	3816.37	0.250981	0.0618705	4.05656	4282.56	3474.75	4.9801e-05	0.000586623
	L2	LINE	L2	14138.6	0.26107	0.0668521	3.90518	15939.8	12861.6	9.41536e-05	0.00099544
	L1M7	LINE	L1	291.67	0.378817	0.0970734	3.90238	339.556	251.25	9.52515e-05	0.00100596
	L1MC4	LINE	L1	7508.22	0.240864	0.0636644	3.78335	8415.33	6897.12	0.000154734	0.0015116
	L1MCc	LINE	L1	318.078	0.397939	0.106917	3.72196	375.444	273.875	0.000197686	0.0018404
	L1ME4a	LINE	L1	7415.26	0.21311	0.0592979	3.59389	8183.44	6839.25	0.000325774	0.00280643
	L1MCb	LINE	L1	155.64	0.40952	0.114293	3.58307	182.778	131.75	0.000339579	0.0029074
	L4_B_Mam	LINE	RTE-X	436.205	0.385019	0.108136	3.5605	513	375	0.000370155	0.00312265
	L1MC2	LINE	L1	904.778	0.283669	0.0833784	3.40219	1026.33	813	0.000668482	0.00507544
	L1ME3	LINE	L1	1843.02	0.288295	0.0857878	3.36056	2085.89	1649	0.000777835	0.00575076
	L1ME5	LINE	L1	794.401	0.268936	0.0819191	3.28294	891.222	716.5	0.0010273	0.00712596
	L1MD	LINE	L1	1624.2	0.264958	0.08224	3.22176	1819	1467.5	0.00127405	0.00850429
	L1ME2	LINE	L1	3066.44	0.288699	0.0900612	3.20559	3457.78	2738.75	0.00134787	0.00889087
	L1MEb	LINE	L1	194.194	0.267278	0.0835002	3.20092	218.444	175.375	0.0013699	0.0090037
	L3	LINE	CR1	10137	0.196004	0.0615439	3.18479	11228.3	9458.38	0.00144858	0.0094174
	L1MEj	LINE	L1	389.755	0.371684	0.116979	3.17735	454.778	337.5	0.00148627	0.0096091
	L2-1_AMi	LINE	L2	105.211	0.347781	0.109878	3.16516	121.667	92.125	0.00154996	0.00994645
	L1M3e	LINE	L1	72.2211	0.40595	0.129898	3.12515	85.2222	61.375	0.00177713	0.0110391
	L1M2a	LINE	L1	237.061	0.390007	0.125705	3.10257	275.556	202	0.00191849	0.0117088
	L1MA4A	LINE	L1	825.004	0.333178	0.108553	3.06925	950.889	725.625	0.00214599	0.0127913
	L1PB	LINE	L1	177.153	0.384582	0.125758	3.0581	207.333	153.375	0.00222742	0.0131956
	L1PA5	LINE	L1	3465.41	0.366755	0.121409	3.02082	4059.44	3008.5	0.0025209	0.0145319
	X9_LINE	LINE	L1	432.439	0.211729	0.0722268	2.93145	476.222	397.5	0.00337387	0.0182297
	L1MDa	LINE	L1	1510.41	0.26024	0.0891305	2.91976	1704.56	1369.75	0.00350298	0.0187819
	L1ME3B	LINE	L1	2280.21	0.192386	0.0661871	2.90669	2497.89	2124.75	0.00365271	0.0193861
	L1MA9	LINE	L1	1920.55	0.314373	0.110001	2.8579	2177.44	1692.75	0.00426452	0.0218383
	L1ME2z	LINE	L1	1450.68	0.188496	0.0683909	2.75615	1593.56	1351.88	0.00584855	0.0278297
	L2a	LINE	L2	38257.5	0.224083	0.0823042	2.72262	42576	35198	0.00647672	0.0301147
	L1MA1	LINE	L1	967.728	0.370255	0.136061	2.72125	1109.78	833.125	0.00650353	0.0302107
	L1ME4b	LINE	L1	5658.57	0.177397	0.0660055	2.68761	6192	5305.88	0.00719662	0.0327264
	L2-3_Crp	LINE	L2	330.676	0.27134	0.103994	2.60918	373.333	300.25	0.00907592	0.0392892
	HAL1b	LINE	L1	576.193	0.213648	0.0825479	2.58817	639	532.25	0.00964879	0.0411928
	L1MA6	LINE	L1	745.587	0.259728	0.100702	2.57917	836.333	672.875	0.00990392	0.0420527
	L1MEi	LINE	L1	464.419	0.274982	0.10816	2.54237	524.889	420.25	0.0110103	0.0457248
	L1PA6	LINE	L1	2827.25	0.309883	0.123491	2.50936	3240.11	2505.38	0.0120949	0.0489584
	L1PA11	LINE	L1	1593.93	0.349399	0.139621	2.50249	1869	1394.75	0.0123323	0.0496052
	LTR27B	LTR	ERV1	39.4379	-1.02707	0.161324	-6.36648	27	55	1.93418e-10	1.19086e-08
	MER51E	LTR	ERV1	134.705	-1.20743	0.19304	-6.25485	81.5556	195.875	3.97891e-10	2.25988e-08
	LTR3A	LTR	ERVK	173.268	-0.7514	0.142326	-5.27942	134.111	224	1.29596e-07	3.53637e-06
	MER67D	LTR	ERV1	270.156	-0.518696	0.117097	-4.42961	230.333	320.125	9.4403e-06	0.000145004
	MER41D	LTR	ERV1	168.186	-0.564293	0.134955	-4.18133	142.222	205	2.8981e-05	0.000373365
	LTR3B	LTR	ERVK	14.9666	-0.86955	0.236128	-3.68254	10.6667	20	0.000230925	0.00209527
	HERV15-int	LTR	ERV1	85.4746	-0.510006	0.138773	-3.6751	73.7778	102.625	0.000237755	0.002145
	HERVH-int	LTR	ERV1	118510	-0.921413	0.275222	-3.34789	79553.6	162807	0.000814299	0.00595277
	MST-int	LTR	ERVL-MaLR	157.1	-0.37396	0.117229	-3.19	141.444	179	0.00142273	0.00928022
	LTR80B	LTR	ERVL	47.2365	-0.720032	0.241627	-2.97993	36	61.625	0.00288311	0.0161168
	LTR38C	LTR	ERV1	36.5986	-0.457819	0.163135	-2.80638	31.7778	42.625	0.00501023	0.0247363
	LTR30	LTR	ERV1	24.8622	-0.6676	0.255619	-2.6117	19.1111	32.25	0.00900942	0.0390764
	MER61D	LTR	ERV1	328.317	-0.661444	0.257741	-2.56631	252.111	417.375	0.0102787	0.0432772
	MamGypLTR2b	LTR	Gypsy	34.0284	-0.664535	0.261342	-2.54278	26.3333	43.125	0.0109976	0.0457042
	HERVE-int	LTR	ERV1	649.535	0.66993	0.0783178	8.55399	811.333	492.375	1.18905e-17	3.45024e-15
	HERVK9-int	LTR	ERVK	624.514	0.912012	0.118246	7.71283	838.667	423.625	1.23058e-14	1.92466e-12
	MER52C	LTR	ERV1	368.319	0.741831	0.101134	7.33514	471.556	269.5	2.21487e-13	2.63866e-11
	HERVK14-int	LTR	ERVK	198.539	0.685032	0.102238	6.70037	248.667	149.125	2.07893e-11	1.56224e-09
	LTR5A	LTR	ERVK	474.972	0.851998	0.127786	6.66739	631	330.375	2.60387e-11	1.90303e-09
	LTR13	LTR	ERVK	906.658	0.466258	0.0839787	5.5521	1086.67	753.375	2.82256e-08	9.60753e-07
	HERVK11-int	LTR	ERVK	400.719	0.954875	0.192639	4.95681	560	259.25	7.16613e-07	1.58744e-05
	MLT1H-int	LTR	ERVL-MaLR	87.725	0.620475	0.12642	4.90805	110.222	68.375	9.19845e-07	1.96773e-05
	MER4CL34	LTR	ERV1	136.311	0.632846	0.129949	4.86994	170.556	104.625	1.11631e-06	2.32982e-05
	HERV9-int	LTR	ERV1	141.323	1.10893	0.234457	4.72976	205.222	81	2.24789e-06	4.264e-05
	LTR16B1	LTR	ERVL	168.21	0.512395	0.109344	4.6861	204.889	137.5	2.78465e-06	5.1166e-05
	HERVP71A-int	LTR	ERV1	46.1528	0.674726	0.146265	4.61303	58.5556	34.875	3.96842e-06	6.91865e-05
	MLT1H	LTR	ERVL-MaLR	1655.86	0.234925	0.0517483	4.53977	1850.67	1520.75	5.63148e-06	9.34022e-05
	LTR37A	LTR	ERV1	283.276	0.576688	0.127216	4.53315	351.667	223	5.81094e-06	9.57287e-05
	LTR67B	LTR	ERVL	547.777	0.257819	0.05765	4.47215	613.889	495.875	7.74385e-06	0.000122279
	PABL_A-int	LTR	ERV1	147.7	0.485498	0.111747	4.34462	178.111	122.375	1.39516e-05	0.000202215
	LTR62	LTR	ERVL	73.755	0.644264	0.148345	4.34301	93.1111	56.625	1.40543e-05	0.00020334
	MER11A	LTR	ERVK	287.174	0.401854	0.0931618	4.31351	336.111	245	1.60685e-05	0.00022785
	MER52D	LTR	ERV1	90.6766	0.624814	0.14559	4.2916	113	70.25	1.7739e-05	0.000246972
	HERVFH21-int	LTR	ERV1	72.9405	0.669742	0.156732	4.27316	93	55.625	1.92718e-05	0.000264419
	MER31B	LTR	ERV1	206.215	0.571396	0.134976	4.23332	254.222	164.125	2.30269e-05	0.000309667
	HERVL66-int	LTR	ERVL	41.9734	0.756913	0.178831	4.23255	55.1111	30.625	2.31057e-05	0.000310196
	MSTA1	LTR	ERVL-MaLR	62.3242	0.580651	0.138805	4.18322	76.4444	48.75	2.87415e-05	0.000370906
	HERVK13-int	LTR	ERVK	112.41	0.932842	0.223103	4.18121	154.778	72.625	2.89958e-05	0.000373365
	MER54B	LTR	ERVL	82.62	0.552222	0.132214	4.17672	101.111	66.625	2.95744e-05	0.00037915
	MamRep605	LTR?	LTR	579.529	0.239713	0.0577029	4.15427	649	529.625	3.26326e-05	0.000411299
	MER74B	LTR	ERVL	575.95	0.547132	0.131947	4.14661	707.444	463.375	3.3744e-05	0.000422261
	MLT1J1	LTR	ERVL-MaLR	339.945	0.310062	0.0750547	4.13115	388.333	302	3.60956e-05	0.000446917
	LTR45C	LTR	ERV1	167.579	0.809064	0.199681	4.05178	215.889	116.75	5.08294e-05	0.000597296
	LTR53-int	LTR	ERVL	72.4402	0.653634	0.162424	4.02424	92.3333	55.25	5.71587e-05	0.000655124
	LTR41B	LTR	ERVL	179.454	0.371205	0.0924114	4.01687	208.333	155.5	5.8976e-05	0.000672533
	MER66-int	LTR	ERV1	132.999	0.609787	0.152822	3.99017	163.667	102.5	6.60254e-05	0.000740247
	MER34C2	LTR	ERV1	168.541	0.358003	0.0909288	3.93718	194.444	146.75	8.24439e-05	0.000892899
	HERVS71-int	LTR	ERV1	350.796	0.714205	0.181927	3.92577	456.333	257.25	8.6453e-05	0.000927674
	LTR1C3	LTR	ERV1	10.8145	1.13027	0.289063	3.91013	16.1111	5.875	9.22448e-05	0.000978436
	MER51-int	LTR	ERV1	156.225	0.429178	0.11002	3.9009	184.889	132.75	9.58374e-05	0.00101069
	LOR1b	LTR	ERV1	109.854	0.591126	0.153604	3.84838	136.444	87.125	0.000118901	0.00121538
	LTR50	LTR	ERVL	362.339	0.286319	0.0751537	3.80977	408.333	324	0.000139094	0.00138701
	LTR102_Mam	LTR	ERVL	122.337	0.53842	0.142138	3.788	150.556	98.5	0.000151864	0.00149001
	LTR107_Mam	LTR	LTR107_Mam	33.5648	0.599257	0.159264	3.76268	41.6667	26	0.000168105	0.00161848
	HERV1_I-int	LTR	ERV1	35.4453	0.933582	0.248217	3.76115	49.1111	22.375	0.000169135	0.00162707
	MLT2B1	LTR	ERVL	211.457	0.368438	0.0981965	3.75205	246.556	183.625	0.000175397	0.00166841
	LTR52	LTR	ERVL	237.662	0.408316	0.109047	3.7444	275.667	202.5	0.000180825	0.00170839
	LTR10C	LTR	ERV1	233.952	0.302557	0.0825917	3.66329	266.778	208.125	0.000248996	0.00222984
	LTR25	LTR	ERV1	641.407	0.483411	0.131969	3.66307	761.333	529.125	0.00024921	0.00223079
	MER101-int	LTR	ERV1	397.019	0.44131	0.121276	3.6389	476	337.125	0.000273805	0.00242063
	HERV1_LTRc	LTR	ERV1	6.31367	1.17785	0.325674	3.61666	9.22222	3	0.000298424	0.00260686
	LTR64	LTR	ERV1	83.7735	0.414156	0.11546	3.58701	97.6667	70.625	0.000334489	0.00286718
	MLT1E	LTR	ERVL-MaLR	138.922	0.379008	0.108142	3.50471	162	120.125	0.000457105	0.00371606
	MLT2A1	LTR	ERVL	290.867	0.331248	0.0952635	3.47718	333.222	255.25	0.000506724	0.00403329
	LTR78B	LTR	ERV1	276.862	0.309516	0.0890233	3.4768	317.556	246.75	0.000507442	0.00403571
	MLT1C-int	LTR	ERVL-MaLR	109.593	0.382691	0.110269	3.47054	128	94.875	0.00051942	0.00411645
	LTR71B	LTR	ERV1	44.4409	0.526671	0.151992	3.46513	53.7778	35.75	0.000529983	0.00418884
	MER50C	LTR	ERV1	19.8739	0.72646	0.210586	3.44971	25.7778	14.375	0.00056119	0.00439174
	LTR35A	LTR	ERV1	19.9122	0.717321	0.208888	3.43401	25.3333	14.375	0.000594727	0.0046098
	MLT1E1	LTR	ERVL-MaLR	223.341	0.286898	0.083931	3.41826	252.889	200	0.000630221	0.00483378
	LTR14B	LTR	ERVK	177.638	0.418376	0.123185	3.39632	210.778	151	0.00068298	0.00516811
	PABL_B-int	LTR	ERV1	81.5962	0.501647	0.148202	3.38489	99.3333	66.5	0.000712067	0.00534406
	LTR1B0	LTR	ERV1	22.56	0.921386	0.272649	3.37939	31.1111	14	0.000726477	0.00542963
	LTR40b	LTR	ERVL	168.23	0.353689	0.104947	3.37017	195.111	147.25	0.000751205	0.00557921
	LTR1F	LTR	ERV1	26.4253	0.663835	0.197401	3.36287	34.1111	20	0.000771365	0.00570581
	MER83	LTR	ERV1	73.0174	0.441605	0.131416	3.36036	86.2222	61	0.000778417	0.00575216
	THE1B-int	LTR	ERVL-MaLR	1528.82	0.436801	0.130771	3.34021	1796.78	1284.75	0.000837162	0.00608198
	MER57D	LTR	ERV1	36.6297	0.565034	0.169891	3.32586	45	28.75	0.000881453	0.00633156
	MLT1E2	LTR	ERVL-MaLR	714.965	0.227642	0.0689447	3.30181	794.556	657.125	0.000960617	0.00675613
	MSTC	LTR	ERVL-MaLR	417.179	0.211534	0.064152	3.29739	461.444	386	0.000975881	0.0068405
	LTR6B	LTR	ERV1	114.015	0.501653	0.152264	3.29463	137.444	92.625	0.000985498	0.00688978
	MER11D	LTR	ERVK	82.4495	0.432152	0.132525	3.26091	98.6667	69.625	0.00111054	0.00757953
	MER83B	LTR	ERV1	98.5147	0.574362	0.17634	3.25712	123.778	77	0.00112547	0.00766363
	LTR1A1	LTR	ERV1	65.4542	0.60491	0.187713	3.22252	80.1111	49.75	0.00127068	0.00848673
	HERVL18-int	LTR	ERVL	45.9555	0.64619	0.200979	3.21521	58.6667	34.75	0.00130351	0.00865868
	MLT1F2	LTR	ERVL-MaLR	993.958	0.217003	0.0678628	3.19768	1103.33	917.25	0.00138539	0.00908723
	MLT1I	LTR	ERVL-MaLR	1132.11	0.229259	0.0720756	3.18081	1263.22	1040.62	0.00146862	0.00951598
	LTR106_Mam	LTR	LTR106_Mam	50.7028	0.452963	0.142784	3.17238	60.8889	42.5	0.00151198	0.00974521
	MSTD	LTR	ERVL-MaLR	1073.09	0.234183	0.0740517	3.16243	1202.78	986.625	0.00156458	0.0100247
	LTR5B	LTR	ERVK	804.537	0.273629	0.0870098	3.1448	914	729.75	0.00166199	0.0105064
	LTR9A1	LTR	ERV1	76.2122	0.421797	0.136973	3.07942	90.7778	64.625	0.00207407	0.0124432
	MER65A	LTR	ERV1	189.733	0.335986	0.110367	3.04427	217.222	166.75	0.00233244	0.0136714
	HERVIP10FH-int	LTR	ERV1	164.47	0.40198	0.13414	2.99673	193.667	139.25	0.00272895	0.0154785
	MER68B	LTR	ERVL	157.757	0.377879	0.126209	2.99407	185.444	137.75	0.00275284	0.0155838
	LTR48	LTR	ERV1	105.479	0.363501	0.121551	2.99052	122.444	91.625	0.00278502	0.0157326
	LTR18B	LTR	ERVL	26.1893	0.558181	0.187163	2.98232	32.5556	20.625	0.0028607	0.0160292
	MLT1D	LTR	ERVL-MaLR	3264.7	0.251655	0.08566	2.93783	3679.44	2976.5	0.00330517	0.0179612
	MER9a2	LTR	ERVK	133.417	0.294539	0.100399	2.93368	150.444	119	0.00334971	0.0181527
	MER21A	LTR	ERVL	534.797	0.256139	0.087861	2.91527	602.333	486.625	0.0035538	0.0189884
	MER34B	LTR	ERV1	98.4279	0.446813	0.154069	2.90008	118.556	82.25	0.00373065	0.0196928
	HUERS-P1-int	LTR	ERV1	684.806	0.526087	0.181667	2.89589	852.889	548.25	0.00378089	0.0198892
	MLT2B4	LTR	ERVL	626.452	0.267542	0.0924382	2.89428	704.222	564.5	0.00380033	0.0199707
	LTR31	LTR	ERV1	27.1824	0.541929	0.188453	2.87567	33.6667	21.875	0.0040317	0.0209016
	LTR22B	LTR	ERVK	34.5062	0.605572	0.210787	2.87291	42.7778	26.625	0.0040671	0.0210183
	HERVH48-int	LTR	ERV1	135.776	0.393536	0.137272	2.86683	159	116.625	0.00414612	0.0213438
	MER67C	LTR	ERV1	174.537	0.228746	0.0802723	2.84962	194.444	160.25	0.00437715	0.0223196
	LTR71A	LTR	ERV1	33.628	0.467031	0.163962	2.8484	40.3333	27.875	0.00439397	0.0223916
	HERV9N-int	LTR	ERV1	64.2051	0.355653	0.125025	2.84466	74.7778	55.875	0.00444586	0.022601
	MLT1A0	LTR	ERVL-MaLR	2758.39	0.183267	0.0645416	2.83952	3026.56	2581.88	0.00451817	0.0228616
	MER65B	LTR	ERV1	18.3969	0.651841	0.229875	2.83563	23.3333	13.875	0.00457353	0.0230938
	MER68	LTR	ERVL	632.338	0.212502	0.0751311	2.82841	703.111	588.25	0.00467797	0.0234434
	LTR13_	LTR	ERVK	15.4654	0.672824	0.239236	2.81239	19.8889	11.375	0.00491743	0.0243644
	MER72	LTR	ERV1	97.2666	0.299703	0.106713	2.80849	110.222	86.625	0.00497738	0.0246073
	LTR16D2	LTR	ERVL	21.5766	0.562242	0.201317	2.79281	26.5556	16.75	0.00522516	0.0255649
	MER21C	LTR	ERVL	1418.42	0.227249	0.0819649	2.77252	1587.33	1306.88	0.00556246	0.0268211
	MLT1M	LTR	ERVL-MaLR	360.351	0.31115	0.112362	2.76918	414.556	319.375	0.00561982	0.0270266
	MLT2B2	LTR	ERVL	215.125	0.262124	0.0948842	2.76257	243.333	195.875	0.00573484	0.0274536
	MER90a	LTR	ERV1	277.263	0.240047	0.0869742	2.75998	309.667	253.75	0.00578056	0.0276003
	HERV1_LTRd	LTR	ERV1	8.1133	0.954014	0.346241	2.75535	12.3333	4.375	0.00586302	0.0278786
	LOR1a	LTR	ERV1	117.803	0.279049	0.102058	2.73422	133	106.25	0.00625278	0.0293153
	LTR12	LTR	ERV1	146.391	0.260642	0.0970763	2.68492	165.444	132.875	0.00725479	0.0329484
	MLT2F	LTR	ERVL	418.718	0.198628	0.0740621	2.68191	462.444	390	0.00732022	0.0331787
	LTR19C	LTR	ERV1	31.2932	0.614914	0.230643	2.66608	40.3333	24	0.00767417	0.0344263
	HERV3-int	LTR	ERV1	159.629	0.434968	0.163243	2.66455	193.333	134.5	0.00770914	0.0345461
	MER4A1_	LTR	ERV1	66.3028	0.349328	0.13195	2.64743	76.3333	57.5	0.00811058	0.035933
	LTR06	LTR	ERV1	7.27207	0.749409	0.284915	2.63029	9.77778	5	0.00853111	0.0374059
	MLT1J	LTR	ERVL-MaLR	2327.1	0.17592	0.0675254	2.60525	2561.22	2182.38	0.00918072	0.0396142
	MLT1F1-int	LTR	ERVL-MaLR	64.7561	0.517609	0.198778	2.60395	79.5556	51.875	0.00921557	0.0397236
	LTR43B	LTR	ERV1	21.8948	0.488576	0.18948	2.57852	26.4444	17.625	0.00992251	0.0421077
	HERV1_LTRb	LTR	ERV1	12.0919	0.648722	0.252279	2.57145	15.5556	8.875	0.0101274	0.0427978
	LTR46	LTR	ERV1	69.0256	0.339152	0.134458	2.52238	79.3333	60.375	0.0116565	0.0477
	SVA_D	Retroposon	SVA	1540.97	0.345432	0.116218	2.97228	1763.33	1344.75	0.00295602	0.0164418
	SVA_F	Retroposon	SVA	717.451	0.243993	0.082267	2.96587	798.222	654.25	0.0030183	0.0166775
	SVA_E	Retroposon	SVA	478.857	0.307979	0.121554	2.53368	542.889	422.625	0.0112873	0.0466239
	AluSg7	SINE	Alu	3307.12	0.366858	0.0454204	8.07695	3821	2874.25	6.6406e-16	1.30615e-13
	AluSx4	SINE	Alu	3305.79	0.284634	0.0427426	6.65927	3740	2970.38	2.75196e-11	1.9914e-09
	AluSc5	SINE	Alu	1907.15	0.264397	0.0460432	5.74238	2139.89	1724.5	9.33542e-09	3.67733e-07
	AluSq	SINE	Alu	7470.54	0.259027	0.0488529	5.30219	8364.89	6784.38	1.14424e-07	3.18612e-06
	AluJo	SINE	Alu	24731.4	0.248804	0.0484755	5.13258	27706.4	22553	2.85803e-07	7.05052e-06
	MIR1_Amn	SINE	MIR	3184.2	0.273842	0.0562945	4.86445	3594.67	2873.75	1.14778e-06	2.3846e-05
	AluJr4	SINE	Alu	5457.11	0.283417	0.0600051	4.72321	6196.56	4911.5	2.32146e-06	4.37242e-05
	AluSq2	SINE	Alu	21138.7	0.204586	0.0436242	4.68972	23317.2	19587.6	2.73574e-06	5.04823e-05
	AluYf1	SINE	Alu	739.073	0.308871	0.0658648	4.68947	839.444	652.5	2.73916e-06	5.04884e-05
	AluSz	SINE	Alu	34842.2	0.230002	0.0492927	4.66604	38748.1	31992.5	3.07058e-06	5.5788e-05
	AluYh3	SINE	Alu	575.95	0.306451	0.0658414	4.65439	654.667	512.25	3.24947e-06	5.82104e-05
	AluJb	SINE	Alu	43227.4	0.218974	0.04842	4.52238	47989	39881.1	6.1147e-06	0.000100002
	AluYg6	SINE	Alu	77.2897	0.540742	0.123349	4.38385	93.2222	61.75	1.16598e-05	0.000173195
	AluSg4	SINE	Alu	2184.65	0.296936	0.0683219	4.34614	2480.33	1956.12	1.38557e-05	0.000201124
	MIRb	SINE	MIR	43080.7	0.235227	0.0549937	4.27734	48202.9	39553.6	1.8914e-05	0.000260241
	AluSx	SINE	Alu	41052	0.212772	0.050443	4.21806	45389	37942.5	2.46408e-05	0.000326328
	FRAM	SINE	Alu	1518.95	0.195386	0.047688	4.09718	1673.56	1414.25	4.18221e-05	0.000505226
	AluSz6	SINE	Alu	15920.2	0.227656	0.0563984	4.03657	17716.3	14620.6	5.4239e-05	0.000628487
	AluSp	SINE	Alu	19848.5	0.210413	0.0537448	3.91504	21918.3	18356.5	9.03904e-05	0.000962948
	Alu	SINE	Alu	574.116	0.243537	0.0667302	3.64957	644.444	525	0.000262675	0.00233977
	MIRc	SINE	MIR	21916.7	0.181476	0.0502881	3.60873	24104.2	20558.4	0.0003077	0.00267431
	AluSc8	SINE	Alu	6890.49	0.221305	0.0625121	3.54019	7623.44	6344.88	0.000399838	0.00333468
	AluYk4	SINE	Alu	230.215	0.276473	0.0804188	3.43791	259.222	206.5	0.000586221	0.00455592
	FLAM_C	SINE	Alu	7496.87	0.219294	0.0643046	3.41024	8300	6890.75	0.00064906	0.00495107
	FLAM_A	SINE	Alu	3364.99	0.153937	0.0475562	3.23696	3664.56	3189.5	0.00120812	0.00813379
	AluY	SINE	Alu	29068.5	0.205575	0.0639711	3.21357	32009.6	26920.2	0.00131098	0.00870036
	AluSq4	SINE	Alu	765.453	0.304822	0.097054	3.14075	877	680.25	0.00168517	0.010617
	AluJr	SINE	Alu	27384.8	0.180009	0.0613762	2.93288	30122.3	25658.6	0.00335833	0.0181692
	AluYj4	SINE	Alu	623.63	0.274391	0.0947681	2.8954	701.111	559.875	0.00378678	0.0199101
	AluYi6_4d	SINE	Alu	17.7275	0.594968	0.214959	2.76782	22.2222	13.75	0.00564323	0.0271042
	AluYk3	SINE	Alu	202.476	0.295598	0.108754	2.71805	230.556	180.625	0.00656686	0.0304469
	MIR	SINE	MIR	30581	0.210756	0.0795033	2.65091	33928.1	28282.6	0.00802746	0.0356834
	AluYc	SINE	Alu	674.227	0.212771	0.0837029	2.54198	744	620.625	0.0110227	0.0457567
	C9ALS vs Control
	Tigger17a	DNA	TcMar-Tigger	702.601	0.429828	0.0520852	8.25242	817.083	573.25	1.55223e-16	1.04522e-13
	MER20	DNA	hAT-Charlie	4490.02	0.385626	0.0487206	7.91506	5132.5	3742.5	2.47143e-15	1.13719e-12
	MER58B	DNA	hAT-Charlie	2077.2	0.362631	0.0483328	7.50278	2377.25	1745.5	6.24763e-14	1.87483e-11
	MER30	DNA	hAT-Charlie	859.922	0.446687	0.0599498	7.45103	1000.33	695.625	9.2617e-14	2.61098e-11
	MER102b	DNA	hAT-Charlie	1051.23	0.352428	0.048641	7.2455	1200.08	890.625	4.30855e-13	1.00805e-10
	MamRep434	DNA	TcMar-Tigger	422.584	0.494457	0.0706722	6.99649	499.417	334.375	2.62448e-12	4.67463e-10
	MER46C	DNA	TcMar-Tigger	817.093	0.464786	0.0670464	6.93231	961.583	658	4.14033e-12	6.80393e-10
	MER5A1	DNA	hAT-Charlie	2534.43	0.357237	0.0524044	6.81693	2898.33	2139	9.30079e-12	1.36414e-09
	MER5A	DNA	hAT-Charlie	6589.66	0.329875	0.0500751	6.5876	7472.17	5626.38	4.46979e-11	5.29623e-09
	Tigger3c	DNA	TcMar-Tigger	532.421	0.360488	0.0548408	6.57335	607.833	447.125	4.91972e-11	5.74065e-09
	ORSL	DNA	hAT-Tip100	237.908	0.442562	0.0686314	6.44839	278.083	192.25	1.13041e-10	1.17767e-08
	MER47A	DNA	TcMar-Tigger	859.627	0.293176	0.0459394	6.3818	967	747.125	1.75015e-10	1.73806e-08
	MER33	DNA	hAT-Charlie	2468.06	0.348628	0.0557373	6.25484	2814.83	2094	3.9792e-10	3.49865e-08
	MER91C	DNA	hAT-Tip100	256.909	0.466675	0.0762493	6.12038	301.667	204.25	9.33503e-10	7.0033e-08
	MER85	DNA	PiggyBac	148.96	0.533113	0.0877673	6.07416	177.583	115.25	1.24635e-09	8.86834e-08
	MER1B	DNA	hAT-Charlie	1432.43	0.424829	0.0700832	6.06179	1661.33	1172.38	1.34617e-09	9.38515e-08
	Charlie23a	DNA	hAT-Charlie	193.616	0.482598	0.0799118	6.03913	229.083	153.25	1.54943e-09	1.06942e-07
	Charlie2a	DNA	hAT-Charlie	496.76	0.369672	0.0612247	6.03796	567.667	415.5	1.56074e-09	1.07453e-07
	MER20B	DNA	hAT-Charlie	1096.86	0.385466	0.0653923	5.89466	1258.83	909.875	3.75444e-09	2.25823e-07
	Tigger9b	DNA	TcMar-Tigger	137.788	0.532686	0.0911065	5.84685	164.25	105.875	5.00983e-09	2.88149e-07
	Charlie19a	DNA	hAT-Charlie	305.59	0.445927	0.0768942	5.79923	356.583	245.625	6.66203e-09	3.64931e-07
	MER63A	DNA	hAT-Blackjack	317.59	0.416232	0.0724143	5.74792	368.667	260.25	9.03469e-09	4.75104e-07
	MER44C	DNA	TcMar-Tigger	211.07	0.48774	0.0855674	5.70007	249.25	166.375	1.19761e-08	6.01155e-07
	MER44B	DNA	TcMar-Tigger	374.49	0.376816	0.066179	5.69389	430.75	311.125	1.24177e-08	6.18821e-07
	MER136	DNA	MER136	80.1115	0.885712	0.155891	5.6816	102.917	49.25	1.33442e-08	6.55528e-07
	Tigger17	DNA	TcMar-Tigger	45.4741	0.945416	0.168353	5.61567	60.8333	26.875	1.95799e-08	9.08507e-07
	MER105	DNA	hAT-Charlie	193.571	0.537616	0.0961634	5.59065	233	149.5	2.26215e-08	1.03229e-06
	MER102c	DNA	hAT-Charlie	583.816	0.365253	0.0654225	5.58299	668.25	489.375	2.36422e-08	1.06827e-06
	Tigger4a	DNA	TcMar-Tigger	1194.71	0.325077	0.0582911	5.5768	1353.75	1023.62	2.4499e-08	1.098e-06
	Charlie4a	DNA	hAT-Charlie	845.557	0.342404	0.0614083	5.57586	961.083	717	2.46316e-08	1.10037e-06
	Tigger3b	DNA	TcMar-Tigger	1641.3	0.441805	0.0801849	5.50982	1922.75	1332.12	3.59191e-08	1.49571e-06
	Charlie13b	DNA	hAT-Charlie	118.993	0.553318	0.100611	5.49959	141.75	90.625	3.80685e-08	1.56631e-06
	Tigger13a	DNA	TcMar-Tigger	510.976	0.403034	0.0739087	5.45314	590.583	420.625	4.94894e-08	1.97443e-06
	Tigger4	DNA	TcMar-Tigger	521.896	0.313271	0.0575189	5.4464	588.75	448.25	5.14002e-08	2.03344e-06
	Tigger3a	DNA	TcMar-Tigger	1892.61	0.351245	0.0652819	5.38043	2157.83	1603.25	7.43087e-08	2.75002e-06
	MER91B	DNA	hAT-Tip100	329.396	0.295538	0.0549554	5.37778	370.667	286	7.54119e-08	2.77967e-06
	Tigger2a	DNA	TcMar-Tigger	666.021	0.351967	0.0658525	5.34478	760.417	561	9.05283e-08	3.2628e-06
	Charlie7a	DNA	hAT-Charlie	224.889	0.449789	0.0841721	5.34368	263	180.25	9.10765e-08	3.26847e-06
	Charlie1b	DNA	hAT-Charlie	698.309	0.340729	0.0638935	5.33277	795.833	593.375	9.67283e-08	3.41493e-06
	MER91A	DNA	hAT-Tip100	493.973	0.372398	0.0702148	5.3037	567.333	414.5	1.13481e-07	3.92113e-06
	Charlie15a	DNA	hAT-Charlie	1193.55	0.29066	0.0555667	5.23082	1341.42	1042	1.68759e-07	5.51372e-06
	MER94	DNA	hAT-Blackjack	553.337	0.338178	0.0649836	5.20405	629.417	470.5	1.94996e-07	6.16659e-06
	Charlie22a	DNA	hAT-Charlie	207.399	0.503545	0.0971548	5.18291	246.75	163.125	2.18448e-07	6.79158e-06
	MER58C	DNA	hAT-Charlie	1200.49	0.308764	0.059805	5.16285	1353.5	1035.38	2.4322e-07	7.46092e-06
	MER113B	DNA	hAT-Charlie	78.427	0.547193	0.106707	5.128	94.4167	60.5	2.92833e-07	8.73059e-06
	HSMAR2	DNA	TcMar-Mariner	570.797	0.398761	0.0778396	5.12286	656.667	471.375	3.00937e-07	8.93363e-06
	MER104	DNA	TcMar-Tc2	659.473	0.269473	0.0530816	5.07659	737.083	577.875	3.84269e-07	1.10509e-05
	MER81	DNA	hAT-Blackjack	395.211	0.310127	0.0632286	4.90486	445.75	338.5	9.34953e-07	2.25631e-05
	MER47C	DNA	TcMar-Tigger	78.4546	0.66675	0.136622	4.88027	97.25	56.125	1.05939e-06	2.487e-05
	MER115	DNA	hAT-Tip100	388.418	0.522083	0.109277	4.7776	460.833	298.125	1.77402e-06	3.8174e-05
	Charlie2b	DNA	hAT-Charlie	508.441	0.354996	0.0743897	4.77211	584.083	428.5	1.8231e-06	3.91082e-05
	MER5B	DNA	hAT-Charlie	5054.19	0.215566	0.0458661	4.6999	5569.33	4539.25	2.60292e-06	5.28717e-05
	MER6B	DNA	TcMar-Tigger	125.144	0.499843	0.107782	4.63754	149	98.75	3.52583e-06	6.85019e-05
	MER106A	DNA	hAT-Charlie	83.1367	0.50045	0.109284	4.57935	99.0833	64.875	4.66433e-06	8.65991e-05
	MADE1	DNA	TcMar-Mariner	465.038	0.371635	0.0815283	4.55836	533.917	389.625	5.15544e-06	9.38243e-05
	MER2	DNA	TcMar-Tigger	2465.99	0.30475	0.067541	4.51208	2791.67	2132.88	6.41961e-06	0.000112315
	Tigger6b	DNA	TcMar-Tigger	49.1106	0.591874	0.131628	4.49656	59.8333	36.5	6.90619e-06	0.00011939
	Tigger4b	DNA	TcMar-Tigger	995.637	0.280562	0.0626883	4.4755	1113.33	870.25	7.62321e-06	0.000129356
	MER8	DNA	TcMar-Tigger	728.919	0.282913	0.0634794	4.45677	816.083	634.875	8.32031e-06	0.00013888
	ORSL-2b	DNA	hAT-Tip100	76.8381	0.492089	0.1105	4.45331	91.0833	60.125	8.45569e-06	0.000140884
	MER45C	DNA	hAT-Tip100	52.0537	0.557557	0.125846	4.43046	62.1667	39.25	9.40308e-06	0.000152169
	Charlie9	DNA	hAT-Charlie	220.564	0.345729	0.0780646	4.42875	250.667	186.375	9.47793e-06	0.000153111
	Tigger1	DNA	TcMar-Tigger	5243.9	0.326289	0.0740477	4.40647	5940.25	4479.5	1.05068e-05	0.000166673
	MER63D	DNA	hAT-Blackjack	215.181	0.357842	0.0817369	4.37797	246.583	180.875	1.19787e-05	0.000185064
	MER63B	DNA	hAT-Blackjack	248.688	0.393255	0.0898682	4.37591	285.833	205.75	1.20926e-05	0.000186252
	MER45B	DNA	hAT-Tip100	130.731	0.490289	0.112183	4.37043	154.667	102	1.24004e-05	0.000190195
	MER1A	DNA	hAT-Charlie	1031	0.318486	0.0729182	4.36772	1171.33	885.125	1.2555e-05	0.000192138
	MERX	DNA	TcMar-Tigger	57.5371	0.540282	0.123995	4.35729	68.6667	44	1.31681e-05	0.00019986
	MER119	DNA	hAT-Charlie	254.402	0.399	0.0920981	4.33233	296	210.875	1.47538e-05	0.000219699
	Tigger16a	DNA	TcMar-Tigger	287.477	0.380186	0.0886839	4.28698	333.333	239.375	1.8112e-05	0.000261525
	Tigger8	DNA	TcMar-Tigger	239.939	0.358371	0.0836789	4.28269	273.167	200	1.84647e-05	0.000265783
	Charlie1	DNA	hAT-Charlie	554.773	0.299927	0.0704994	4.25433	624.5	477.75	2.0968e-05	0.00029565
	Chap1_Mam	DNA	hAT-Charlie	176.633	0.391581	0.0926947	4.22442	202.833	144.25	2.3956e-05	0.000329207
	MER2B	DNA	TcMar-Tigger	314.909	0.251918	0.0598838	4.20677	350.5	278.5	2.59042e-05	0.000351778
	MER6C	DNA	TcMar-Tigger	56.534	0.591082	0.142039	4.1614	68.75	42	3.16298e-05	0.000413855
	MER44D	DNA	TcMar-Tigger	108.391	0.374191	0.0900354	4.15604	123.75	89.875	3.23807e-05	0.000421682
	MER75	DNA	PiggyBac	196.484	0.43325	0.104993	4.12647	227.417	158.625	3.68372e-05	0.000467157
	Looper	DNA	PiggyBac	190.889	0.429776	0.105511	4.07329	222.917	156.125	4.63545e-05	0.000565253
	Charlie24	DNA	hAT-Charlie	295.306	0.302152	0.0743442	4.06424	333.667	255.125	4.81901e-05	0.000585062
	Kanga1c	DNA	TcMar-Tc2	170.201	0.465291	0.114792	4.05333	200.75	136.125	5.04935e-05	0.000606889
	Charlie20a	DNA	hAT-Charlie	115.848	0.553964	0.136674	4.05318	140.5	88.875	5.05267e-05	0.000607024
	MER6A	DNA	TcMar-Tigger	242.793	0.350783	0.0874467	4.0114	275.917	203.625	6.03606e-05	0.000702545
	Charlie3	DNA	hAT-Charlie	98.7501	0.636058	0.158904	4.00278	119.583	69.625	6.26036e-05	0.000721531
	Tigger12c	DNA	TcMar-Tigger	292.589	0.40839	0.102135	3.99853	340.583	240	6.37375e-05	0.000731366
	Kanga1b	DNA	TcMar-Tc2	63.7457	0.428288	0.10751	3.98369	74.3333	51.75	6.78539e-05	0.000769326
	MER5C	DNA	hAT-Charlie	213.677	0.35083	0.0898011	3.90674	243.417	180.25	9.35488e-05	0.00100887
	MER124	DNA?	DNA	52.7716	0.44312	0.113464	3.90539	61.75	42.125	9.40748e-05	0.00101375
	Kanga1a	DNA	TcMar-Tc2	142.961	0.309358	0.0794029	3.89605	161.167	123	9.77731e-05	0.00104544
	Charlie10	DNA	hAT-Charlie	544.66	0.305734	0.0794741	3.84696	615.917	470.625	0.000119591	0.00123197
	UCON55	DNA	TcMar-Tigger	70.1697	0.437224	0.114786	3.80902	82.5833	56.875	0.000139518	0.00138921
	Tigger5b	DNA	TcMar-Tigger	469.426	0.348008	0.0920767	3.77954	537.5	395.375	0.000157118	0.00153276
	MamRep38	DNA	hAT	275.316	0.292273	0.0780917	3.7427	309.833	239.125	0.000182057	0.00172782
	Tigger19b	DNA	TcMar-Tigger	2085.27	0.234508	0.0628982	3.72837	2313.58	1860.88	0.000192722	0.00180729
	MamRep1879	DNA	hAT-Tip100	119.086	0.343572	0.0924584	3.71596	136.25	100.625	0.00020243	0.00187918
	Tigger10	DNA	TcMar-Tigger	173.288	0.30266	0.0817798	3.70091	195.5	149.5	0.000214827	0.00197172
	MER103C	DNA	hAT-Charlie	1916.79	0.204568	0.0552893	3.69997	2113.75	1734.62	0.000215628	0.00197776
	MER5C1	DNA	hAT-Charlie	79.1473	0.448588	0.122036	3.67587	92.0833	62.75	0.000237041	0.00213864
	MER112	DNA	hAT-Charlie	1056.96	0.166003	0.0459243	3.61471	1151.33	971	0.000300689	0.00259756
	Kanga11a	DNA	TcMar-Tc2	83.97	0.408326	0.113337	3.60275	97	68.625	0.000314865	0.00269343
	MER3	DNA	hAT-Charlie	3258.15	0.194771	0.0557627	3.49286	3564.17	2947.75	0.000477881	0.00377168
	Charlie4	DNA	hAT-Charlie	52.8727	0.634738	0.181803	3.49134	64.8333	37	0.0004806	0.00378989
	Charlie18a	DNA	hAT-Charlie	969.006	0.252792	0.0726493	3.47962	1074.42	850	0.000502127	0.00391935
	UCON78	DNA	UCON78	10.7051	0.719383	0.207213	3.47171	13.75	6.875	0.000517161	0.00401287
	MER121	DNA	hAT	31.8782	0.507488	0.14767	3.43663	38.3333	24.625	0.000588994	0.00446729
	MER30B	DNA	hAT-Charlie	78.99	0.37773	0.111485	3.38819	90.6667	64.875	0.000703566	0.00517147
	Charlie30a	DNA	hAT-Charlie	77.8704	0.361716	0.106915	3.3832	89.3333	64.75	0.000716477	0.00525378
	MER113	DNA	hAT-Charlie	910.823	0.220301	0.0657118	3.35253	1007.58	814.125	0.000800771	0.00574226
	Tigger18a	DNA	TcMar-Tigger	204.021	0.269697	0.081502	3.30908	228.333	179	0.000936017	0.00648145
	Tigger1a_Art	DNA	TcMar-Tigger	82.3355	0.356766	0.10857	3.28604	93.75	68.375	0.00101607	0.00692155
	Tigger3d	DNA	TcMar-Tigger	54.2626	0.40548	0.124703	3.25155	62.6667	44.125	0.00114776	0.00760982
	MamRep137	DNA	TcMar	72.9272	0.416444	0.129495	3.21592	85.5	59.125	0.00130028	0.00843272
	MER117	DNA	hAT-Charlie	1389.54	0.143151	0.0446686	3.20473	1496	1285.5	0.00135188	0.00869185
	MER58A	DNA	hAT-Charlie	4195.25	0.195285	0.0611884	3.19153	4589.42	3789.88	0.00141521	0.0090104
	MER47B	DNA	TcMar-Tigger	95.1641	0.361338	0.113845	3.17394	109.667	79.625	0.00150385	0.00946181
	Zaphod	DNA	hAT-Tip100	157.037	0.255556	0.0813113	3.14293	175.583	138.375	0.00167268	0.0103033
	Merlin1_HS	DNA	Merlin	54.9647	0.483982	0.15467	3.12913	66.1667	43.125	0.00175327	0.01069
	MER113A	DNA	hAT-Charlie	303.42	0.200737	0.0645961	3.10757	333.25	273	0.00188635	0.0113288
	Charlie15b	DNA	hAT-Charlie	434.157	0.184798	0.0600238	3.07874	476.333	396.875	0.00207875	0.0122236
	MamRep137	DNA	TcMar-Tigger	726.222	0.218905	0.071611	3.05687	802.083	647.875	0.00223663	0.0129154
	Tigger12	DNA	TcMar-Tigger	599.718	0.247575	0.081986	3.01972	662.083	527.5	0.00253008	0.0143019
	MER63C	DNA	hAT-Blackjack	106.684	0.335717	0.112161	2.99317	122.333	90.875	0.00276097	0.0152748
	MER45A	DNA	hAT-Tip100	274.076	0.191631	0.0669564	2.86203	301	248.375	0.00420936	0.0213157
	Kanga2_a	DNA	TcMar-Tc2	324.154	0.210574	0.0751161	2.80331	356.583	290.25	0.00505803	0.0246675
	Charlie16a	DNA	hAT-Charlie	393.198	0.170397	0.061139	2.78704	429.5	361.5	0.00531924	0.0256228
	UCON29	DNA	PiggyBac	25.3531	0.410346	0.148988	2.75423	29.75	20.625	0.00588308	0.0277747
	MamTip2	DNA	hAT-Tip100	745.019	0.153812	0.0559871	2.74727	809.75	688.5	0.00600938	0.0282251
	MER97d	DNA	hAT-Tip100	41.3649	0.435039	0.160678	2.70752	48.3333	32.5	0.00677879	0.0311288
	hAT-N1_Mam	DNA	hAT-Tip100	50.4625	0.399241	0.148134	2.69514	59.25	41.5	0.00703594	0.0320701
	MER106B	DNA	hAT-Charlie	111.524	0.28396	0.106434	2.66796	125.083	96.5	0.00763142	0.0341085
	Tigger16b	DNA	TcMar-Tigger	1113.62	0.242704	0.0922378	2.63128	1231.67	983.125	0.00850628	0.0370847
	Tigger19a	DNA	TcMar-Tigger	1429.06	0.160339	0.0612874	2.61618	1556.75	1317.62	0.00889201	0.0382265
	MER45R	DNA	hAT-Tip100	27.2349	0.396565	0.153559	2.58248	31.5	22	0.00980917	0.0413516
	DNA1_Mam	DNA	TcMar	23.9918	0.407815	0.158192	2.57797	27.8333	19.25	0.00993826	0.0417873
	MER53	DNA	hAT	584.793	0.193698	0.0752287	2.57478	641.75	530	0.0100303	0.0421039
	Kanga1d	DNA	TcMar-Tc2	73.4498	0.337763	0.131749	2.56368	83.75	61.875	0.010357	0.0431471
	Tigger2b_Pri	DNA	TcMar-Tigger	328.116	0.261942	0.102803	2.54801	365.083	285.5	0.0108341	0.0446162
	Tigger17b	DNA	TcMar-Tigger	10.5814	0.536637	0.211031	2.54292	12.8333	7.5	0.0109929	0.0451357
	Charlie10b	DNA	hAT-Charlie	61.8985	0.357891	0.142168	2.51738	72.1667	51.625	0.0118232	0.0478966
	MER135	DNA	MER135	106.822	0.238182	0.0947789	2.51303	118.417	94.125	0.0119699	0.0483842
	MER97a	DNA	hAT-Tip100	22.2613	0.417554	0.166282	2.51112	26.1667	17.875	0.012035	0.0485763
	X6A_LINE	LINE	CR1	954.415	-0.164069	0.0409612	-4.00547	946.25	1004	6.18932e-05	0.000716757
	L2b	LINE	L2	25647.9	0.381672	0.0468683	8.14351	29384.3	21407	3.83986e-16	2.12022e-13
	L2c	LINE	L2	30941.7	0.367094	0.049803	7.37091	35405.1	26012.5	1.69465e-13	4.45581e-11
	L1MA5A	LINE	L1	523.738	0.551401	0.0801785	6.87717	627.75	403.75	6.10542e-12	9.57718e-10
	L2	LINE	L2	15435.1	0.386642	0.0569185	6.7929	17730.7	12861.6	1.09899e-11	1.56397e-09
	L3b	LINE	CR1	2941.5	0.257335	0.0386004	6.66664	3277.08	2602.12	2.61731e-11	3.32662e-09
	L1MB3	LINE	L1	4566.9	0.334634	0.0538532	6.21381	5180.58	3897.5	5.17143e-10	4.32645e-08
	L3	LINE	CR1	10894.1	0.297396	0.0479333	6.20438	12277.2	9458.38	5.49145e-10	4.55279e-08
	HAL1	LINE	L1	5693.06	0.323616	0.0524963	6.16454	6440.58	4884	7.06879e-10	5.65453e-08
	L1ME5	LINE	L1	830.199	0.300181	0.0521818	5.75259	933.25	716.5	8.78878e-09	4.63914e-07
	L1MB7	LINE	L1	6745.28	0.324763	0.0572827	5.66948	7624.17	5767.88	1.43233e-08	6.96192e-07
	L1M2c	LINE	L1	104.474	0.823097	0.149003	5.52401	136.667	68	3.31348e-08	1.40083e-06
	CR1-L3A_Croc	LINE	CR1	52.6218	0.688839	0.124802	5.51947	65	37.125	3.40032e-08	1.42886e-06
	L1MEi	LINE	L1	521.725	0.455395	0.0825853	5.51423	610.667	420.25	3.50308e-08	1.46757e-06
	L1MDa	LINE	L1	1657.27	0.394472	0.0738516	5.34141	1905.17	1369.75	9.2224e-08	3.29808e-06
	L1MC4	LINE	L1	8026.46	0.323155	0.0605657	5.33561	9110.92	6897.12	9.52261e-08	3.37918e-06
	L1PA11	LINE	L1	1852.61	0.580125	0.109746	5.28605	2256.25	1394.75	1.24983e-07	4.27575e-06
	L1PA6	LINE	L1	3287.13	0.547952	0.104283	5.25446	3916.25	2505.38	1.48461e-07	4.92635e-06
	CR1-3_Croc	LINE	CR1	118.375	0.498391	0.0959345	5.19512	140.083	92.25	2.04593e-07	6.40407e-06
	L4_B_Mam	LINE	RTE-X	461.261	0.424628	0.0820923	5.17257	536.333	375	2.309e-07	7.13051e-06
	L1PA8	LINE	L1	2815.22	0.588238	0.113757	5.17101	3449.17	2114.25	2.32831e-07	7.18211e-06
	L1P3b	LINE	L1	348.938	0.99915	0.198553	5.03215	456.5	188.5	4.85022e-07	1.34308e-05
	L2a	LINE	L2	41733.2	0.351335	0.0703338	4.99525	47575.3	35198	5.87597e-07	1.56353e-05
	L1ME4c	LINE	L1	2018.96	0.286025	0.0577015	4.95698	2269.25	1757.62	7.15976e-07	1.82855e-05
	L1M8	LINE	L1	206.878	0.474122	0.0964249	4.91701	245.167	164.5	8.78763e-07	2.15844e-05
	L1MC2	LINE	L1	949.681	0.320121	0.0651424	4.91417	1071.5	813	8.91606e-07	2.18416e-05
	L1MA5	LINE	L1	815.508	0.444246	0.0905837	4.90426	952.5	658.25	9.37782e-07	2.26116e-05
	L2-3_Crp	LINE	L2	362.942	0.402744	0.0824732	4.88334	419.25	300.25	1.04306e-06	2.45917e-05
	L1PBa1	LINE	L1	128.827	0.604061	0.124143	4.86587	154.833	94.875	1.13955e-06	2.63932e-05
	L1MD1	LINE	L1	2254.95	0.339814	0.0698689	4.86359	2557.5	1911	1.15274e-06	2.66245e-05
	L1MC5	LINE	L1	4040.73	0.310179	0.0638109	4.86091	4569.08	3474.75	1.16848e-06	2.68829e-05
	L1ME4a	LINE	L1	7672.82	0.227676	0.0486749	4.67748	8475.25	6839.25	2.90416e-06	5.78485e-05
	L4_C_Mam	LINE	RTE-X	825.926	0.267645	0.0581282	4.60439	922.333	725.875	4.13669e-06	7.86e-05
	L1MEj	LINE	L1	429.699	0.491458	0.107502	4.57162	512.417	337.5	4.8396e-06	8.95521e-05
	L1ME3	LINE	L1	1921.78	0.310323	0.0680841	4.55793	2168.75	1649	5.16591e-06	9.39528e-05
	L1MA7	LINE	L1	1383.69	0.406596	0.0896209	4.53685	1606.58	1133.62	5.7101e-06	0.000102167
	HAL1ME	LINE	L1	1308.5	0.256774	0.0568184	4.5192	1458.58	1155.88	6.20731e-06	0.000109503
	X7B_LINE	LINE	CR1	147.223	0.446734	0.10036	4.45132	173.083	119.125	8.53436e-06	0.000141596
	L1ME4b	LINE	L1	5977.04	0.242148	0.0546681	4.42942	6634.67	5305.88	9.44878e-06	0.000152819
	L1MA4A	LINE	L1	884.297	0.40436	0.0922801	4.38188	1018.33	725.625	1.17659e-05	0.000182741
	L1PA7	LINE	L1	3877.46	0.397487	0.0914157	4.34812	4460.83	3184.25	1.37309e-05	0.000206696
	L1PA5	LINE	L1	3666.45	0.408444	0.0940189	4.34428	4234.25	3008.5	1.39736e-05	0.000210121
	HAL1b	LINE	L1	616.951	0.301913	0.0704586	4.28497	694.75	532.25	1.82764e-05	0.000263283
	L1MA9	LINE	L1	2011.75	0.342806	0.081024	4.23092	2278.33	1692.75	2.32734e-05	0.000321748
	X7C_LINE	LINE	CR1	117.194	0.466412	0.110894	4.20592	139.083	93.75	2.60023e-05	0.00035259
	Plat_L3	LINE	CR1	1063.95	0.33946	0.0808022	4.20112	1215.08	906.625	2.65601e-05	0.000359447
	L1PB	LINE	L1	189.59	0.442057	0.105405	4.19389	220.75	153.375	2.74207e-05	0.000368743
	L1MD	LINE	L1	1646.33	0.228623	0.0547979	4.1721	1819	1467.5	3.01799e-05	0.000399237
	L2-1_AMi	LINE	L2	114.378	0.439858	0.106536	4.12874	133.333	92.125	3.64754e-05	0.00046409
	L1MEg	LINE	L1	2014.53	0.321481	0.0792561	4.05623	2284.67	1723.5	4.9872e-05	0.000599941
	L1MEh	LINE	L1	359.615	0.399884	0.100022	3.99794	413.083	294.75	6.38961e-05	0.00073288
	L1ME2z	LINE	L1	1527.25	0.243576	0.0614641	3.96289	1695.5	1351.88	7.40469e-05	0.000825974
	X9_LINE	LINE	L1	446.496	0.22301	0.0574351	3.88281	492.167	397.5	0.000103258	0.00109686
	L1MEd	LINE	L1	4022.5	0.259076	0.0668807	3.87371	4484.25	3541.25	0.000107191	0.00113168
	L1ME3A	LINE	L1	3833.14	0.325089	0.0846956	3.83833	4334.92	3245.12	0.000123876	0.00126291
	L1MA6	LINE	L1	801.988	0.348654	0.0909351	3.8341	915.917	672.875	0.000126025	0.00128009
	L1PREC2	LINE	L1	2059.19	0.40267	0.105765	3.80721	2361.17	1684	0.000140543	0.00139823
	L1M4a1	LINE	L1	419.572	0.328772	0.086928	3.78212	473.917	357.75	0.000155501	0.00152021
	L1MC	LINE	L1	1617.1	0.247318	0.0654178	3.7806	1787.83	1429.5	0.000156453	0.00152736
	L5	LINE	RTE-X	95.9634	0.425198	0.112981	3.76344	112.75	77.75	0.000167592	0.00161271
	L1PA13	LINE	L1	1187.73	0.331079	0.0886859	3.73316	1342.33	1009.12	0.000189089	0.00177805
	X7A_LINE	LINE	CR1	159.858	0.462746	0.124397	3.71992	190.083	128.75	0.000199288	0.00185438
	L1ME3B	LINE	L1	2346.54	0.197003	0.0530969	3.71026	2573.33	2124.75	0.000207048	0.00191305
	L1MCc	LINE	L1	321.668	0.339058	0.0917562	3.6952	367.833	273.875	0.00021971	0.00200786
	L1M4c	LINE	L1	2272.2	0.309395	0.0840443	3.68133	2555.75	1941.25	0.000232019	0.00209881
	L1M6	LINE	L1	459.414	0.304407	0.0828729	3.67317	520.083	397.875	0.000239557	0.00215827
	L1PBb	LINE	L1	61.1193	0.528643	0.144032	3.6703	72.9167	62.5	0.000242262	0.00217649
	L1PA17	LINE	L1	742.443	0.418896	0.114386	3.66212	851.833	600.875	0.000250138	0.00223778
	L1MC5a	LINE	L1	6203.23	0.211626	0.0579081	3.65452	6834.92	5577.88	0.000257663	0.00229321
	L1P2	LINE	L1	710.498	0.429582	0.118359	3.62948	821.583	568.375	0.000283998	0.00247963
	L1PA15-16	LINE	L1	139.72	0.44739	0.123305	3.62833	162.583	111.25	0.000285261	0.00248673
	L1MA1	LINE	L1	982.773	0.32797	0.0910883	3.60057	1107.25	833.125	0.00031752	0.00270892
	L1M7	LINE	L1	293.596	0.311107	0.0864527	3.59858	330.167	251.25	0.000319962	0.00272219
	L1MC1	LINE	L1	2510.98	0.275409	0.0773826	3.55906	2807.83	2194.38	0.000372185	0.00307552
	L1MEb	LINE	L1	202.858	0.294671	0.0845282	3.48607	229.417	175.375	0.000490178	0.00384783
	L1M3e	LINE	L1	76.8635	0.43642	0.127038	3.43535	89.25	61.375	0.000591781	0.00448474
	L1MA3	LINE	L1	1649.18	0.320948	0.0964504	3.32759	1869.67	1403.88	0.000875995	0.00615851
	L1M1	LINE	L1	1446.56	0.318576	0.0958176	3.32481	1637.42	1241	0.000884775	0.0062117
	CR1_Mam	LINE	CR1	326.928	0.347186	0.10752	3.22905	373.833	278.5	0.00124203	0.00812172
	L1MD2	LINE	L1	2345.05	0.319692	0.0993901	3.21654	2653.5	1999.12	0.00129747	0.00842045
	L1PA4	LINE	L1	4187.89	0.362707	0.113843	3.18603	4761.83	3483.88	0.00144239	0.0091441
	L1ME3E	LINE	L1	830.652	0.286481	0.0904855	3.16605	931.083	717.5	0.00154527	0.00965916
	L1MA4	LINE	L1	1292.03	0.364649	0.115779	3.14954	1476.33	1071.38	0.0016353	0.0101046
	X6B_LINE	LINE	CR1	1144.94	0.269521	0.0857763	3.14214	1268.5	999.125	0.00167717	0.010324
	L1PA3	LINE	L1	5919.3	0.348303	0.113141	3.07849	6722.75	4966.62	0.0020805	0.0122287
	L1P3	LINE	L1	647.079	0.286734	0.0939598	3.05167	722.167	561.375	0.00227571	0.0131
	L1MCb	LINE	L1	156.549	0.332385	0.110122	3.01835	176.833	131.75	0.00254159	0.0143552
	L1MC3	LINE	L1	2453.32	0.282025	0.0941058	2.99689	2756	2116.12	0.00272748	0.0151358
	L1M3	LINE	L1	2393.12	0.677282	0.23081	2.93437	3247.67	3302.62	0.00334222	0.017748
	L1ME2	LINE	L1	3042.44	0.201116	0.0692358	2.90479	3332.33	2738.75	0.00367496	0.0191106
	L1MEf	LINE	L1	3036.79	0.252134	0.0872573	2.88955	3362.25	2670.12	0.00385798	0.0198308
	L1PB4	LINE	L1	974.575	0.234524	0.0812368	2.88692	1077.67	867.625	0.00389033	0.0199748
	L1P4	LINE	L1	320.599	0.294185	0.108539	2.71042	361.583	277.875	0.00671983	0.0309134
	L1MDb	LINE	L1	277.462	0.304291	0.114245	2.6635	317.083	238.125	0.00773325	0.0344299
	L1M2	LINE	L1	6616.42	0.380085	0.143915	2.64104	7645.08	5349.62	0.00826509	0.0362482
	L1MEc	LINE	L1	3886.17	0.292948	0.111264	2.63292	4342.42	3346.38	0.00846545	0.0369392
	L1PB2	LINE	L1	583.999	0.41718	0.158616	2.63012	680.167	469.875	0.00853539	0.0371463
	L1M3d	LINE	L1	35.1068	0.359634	0.139277	2.58215	40.5833	29.125	0.00981866	0.0413727
	L1PBa	LINE	L1	351.793	0.354229	0.141026	2.5118	400.083	293.5	0.0120117	0.0485179
	LTR27B	LTR	ERV1	41.6451	-0.728044	0.131368	-5.54201	33.75	55	2.99019e-08	1.28989e-06
	MER51E	LTR	ERV1	152.696	-0.675406	0.125044	-5.40135	124.167	195.875	6.61423e-08	2.48782e-06
	LTR16D1	LTR	ERVL	685.743	-0.597054	0.116173	-5.13936	581.917	848.375	2.75671e-07	8.30865e-06
	LTR13	LTR	ERVK	1002.72	0.595513	0.051323	11.6032	1212.25	753.375	3.9674e-31	2.28953e-27
	LTR10B1	LTR	ERV1	250.467	0.870265	0.107238	8.11523	321.5	160.875	4.84853e-16	2.57419e-13
	LTR9A1	LTR	ERV1	95.8061	0.795845	0.100737	7.90021	121.583	64.625	2.78444e-15	1.26021e-12
	MSTD	LTR	ERVL-MaLR	1194.62	0.405901	0.0523563	7.75267	1380.42	986.625	8.99779e-15	3.54873e-12
	LTR5B	LTR	ERVK	972.902	0.604674	0.0791104	7.64342	1181.5	729.75	2.11521e-14	7.27601e-12
	MLT2C2	LTR	ERVL	198.76	0.758793	0.0999998	7.58794	248.917	135.5	3.25021e-14	1.04339e-11
	LTR37A	LTR	ERV1	323.772	0.742928	0.100596	7.38528	404.167	223	1.52137e-13	4.07785e-11
	MER52-int	LTR	ERV1	65.5996	0.815651	0.110766	7.36372	83.0833	43.375	1.78857e-13	4.65839e-11
	HERVK9-int	LTR	ERVK	593.604	0.690585	0.0941476	7.33513	728.25	423.625	2.21507e-13	5.60042e-11
	HERVK11-int	LTR	ERVK	440.956	1.00298	0.136755	7.33415	585.5	259.25	2.2314e-13	5.60042e-11
	HERV4_I-int	LTR	ERV1	1121.43	0.87314	0.122235	7.14311	1450.92	717.5	9.1241e-13	1.93768e-10
	MER51B	LTR	ERV1	215.649	0.546197	0.0776216	7.03666	256.5	165	1.96908e-12	3.62416e-10
	HERVIP10B3-int	LTR	ERV1	1139.85	0.978842	0.141028	6.94078	1491.58	678.75	3.89931e-12	6.48507e-10
	LTR5A	LTR	ERVK	531.443	0.913637	0.132001	6.92143	698.333	330.375	4.47109e-12	7.21859e-10
	LTR52	LTR	ERVL	256.926	0.494743	0.0719982	6.8716	302	202.5	6.34871e-12	9.84693e-10
	LTR62	LTR	ERVL	111.697	1.18526	0.173665	6.82496	153.25	56.625	8.79491e-12	1.32683e-09
	MER52C	LTR	ERV1	369.553	0.633514	0.0930721	6.8067	448.667	269.5	9.9861e-12	1.44344e-09
	MER68B	LTR	ERVL	185.471	0.627525	0.0971903	6.45666	226.333	137.75	1.07037e-10	1.11935e-08
	MLT1D	LTR	ERVL-MaLR	3517.43	0.351168	0.054716	6.41801	4002.5	2976.5	1.38063e-10	1.40652e-08
	MLT1J1	LTR	ERVL-MaLR	373.181	0.437962	0.0695704	6.29523	434.667	302	3.06945e-10	2.82472e-08
	LTR6B	LTR	ERV1	160.768	0.998017	0.159106	6.27265	211.083	92.625	3.54964e-10	3.18177e-08
	LTR45C	LTR	ERV1	157.928	0.613761	0.0987376	6.21608	190.5	116.75	5.09724e-10	4.27734e-08
	MER68	LTR	ERVL	701.538	0.378523	0.0610313	6.20211	806.417	588.25	5.57119e-10	4.60507e-08
	LTR16A2	LTR	ERVL	150.687	0.531575	0.0860669	6.1763	179.083	116.625	6.56227e-10	5.31294e-08
	MER57-int	LTR	ERV1	276.561	0.502271	0.0819313	6.13039	325.333	216.5	8.76631e-10	6.64891e-08
	MER11A	LTR	ERVK	349.186	0.697454	0.118009	5.91018	429.333	245	3.41738e-09	2.10596e-07
	MLT1J	LTR	ERVL-MaLR	2501.79	0.280642	0.0479347	5.85468	2805.17	2182.38	4.77934e-09	2.77786e-07
	LTR10C	LTR	ERV1	258.605	0.443639	0.0760838	5.83092	301	208.125	5.51217e-09	3.11206e-07
	LTR19C	LTR	ERV1	41.0004	0.967091	0.169289	5.71266	54.1667	24	1.11226e-08	5.66553e-07
	MSTC	LTR	ERVL-MaLR	464.131	0.38208	0.0679474	5.62317	531.333	386	1.87481e-08	8.79343e-07
	MamGypLTR1a	LTR	Gypsy	330.029	0.668746	0.120092	5.56862	405.667	233.625	2.56758e-08	1.13964e-06
	LTR84b	LTR	ERVL	141.24	0.594423	0.10683	5.5642	172	105.5	2.6336e-08	1.16333e-06
	MER51-int	LTR	ERV1	217.085	0.906316	0.163686	5.53693	278.833	132.75	3.07824e-08	1.32374e-06
	LTR25	LTR	ERV1	671.86	0.495207	0.0901985	5.49018	798.5	529.125	4.01513e-08	1.64524e-06
	THE1B-int	LTR	ERVL-MaLR	1677.36	0.543149	0.0989471	5.48929	1985.33	1284.75	4.03562e-08	1.6506e-06
	LTR16B1	LTR	ERVL	173.306	0.47881	0.0874962	5.47235	203.083	137.5	4.44112e-08	1.80126e-06
	MLT1H	LTR	ERVL-MaLR	1749.6	0.292085	0.0536113	5.44821	1958.58	1520.75	5.08791e-08	2.0182e-06
	LTR16C	LTR	ERVL	844.35	0.394825	0.0726968	5.43112	974.417	700.375	5.60029e-08	2.16545e-06
	MLT1F2	LTR	ERVL-MaLR	1061.18	0.300075	0.0553905	5.41744	1194.08	917.25	6.04588e-08	2.29668e-06
	HERVS71-int	LTR	ERV1	464.922	1.00754	0.186434	5.4043	621.333	257.25	6.50631e-08	2.45056e-06
	LTR40b	LTR	ERVL	186.219	0.488243	0.0911983	5.35364	220.167	147.25	8.62025e-08	3.13142e-06
	MER4CL34	LTR	ERV1	140.759	0.591045	0.11109	5.3204	171.083	104.625	1.03537e-07	3.61373e-06
	LTR67B	LTR	ERVL	573.796	0.29481	0.0554444	5.31723	646.75	495.875	1.0536e-07	3.66344e-06
	MER83	LTR	ERV1	79.518	0.533279	0.100911	5.28465	94.75	61	1.25945e-07	4.29803e-06
	MER21C	LTR	ERVL	1564.73	0.377892	0.0715339	5.28269	1802.67	1306.88	1.27298e-07	4.33348e-06
	MLT1L	LTR	ERVL-MaLR	4215.06	0.511563	0.0970564	5.27079	5003.92	3296.38	1.35841e-07	4.56241e-06
	MLT1A0	LTR	ERVL-MaLR	2940.4	0.267745	0.05088	5.26229	3279.25	2581.88	1.4227e-07	4.74371e-06
	THE1B	LTR	ERVL-MaLR	2864.05	0.367633	0.0704035	5.22181	3269.08	2392.25	1.77184e-07	5.728e-06
	MER21B	LTR	ERVL	941.197	0.363003	0.0695796	5.21708	1076.33	789.25	1.81761e-07	5.83496e-06
	LTR1F	LTR	ERV1	31.7128	0.852162	0.165105	5.16132	41.1667	20	2.45219e-07	7.51388e-06
	LTR37B	LTR	ERV1	290.194	0.418963	0.0814881	5.1414	337.5	237.375	2.72703e-07	8.24619e-06
	MER67C	LTR	ERV1	198.535	0.439571	0.0866177	5.07484	231.75	160.25	3.87822e-07	1.11415e-05
	HERVIP10FH-int	LTR	ERV1	212.596	0.776225	0.154434	5.02627	265.25	139.25	5.00109e-07	1.37932e-05
	MER21A	LTR	ERVL	581.416	0.370643	0.0738349	5.01988	666.417	486.625	5.17026e-07	1.41889e-05
	MLT1E1	LTR	ERVL-MaLR	238.259	0.356446	0.0720512	4.94712	271.5	200	7.53204e-07	1.90775e-05
	MLT2B4	LTR	ERVL	682.823	0.385493	0.0783186	4.92211	782.667	564.5	8.56157e-07	2.11231e-05
	LTR16B	LTR	ERVL	102.461	0.462527	0.0943257	4.90352	120.333	82	9.41363e-07	2.26781e-05
	MLT1G	LTR	ERVL-MaLR	343.513	0.39084	0.0798816	4.89274	398.083	284.75	9.94419e-07	2.37158e-05
	MLT1A	LTR	ERVL-MaLR	1084.96	0.345701	0.0717404	4.81877	1238.92	917.75	1.44443e-06	3.21078e-05
	MLT1J2	LTR	ERVL-MaLR	744.729	0.331027	0.0688939	4.80488	845.583	637	1.54845e-06	3.40168e-05
	MER67B	LTR	ERV1	275.923	0.388516	0.0819738	4.73951	320.167	230.625	2.14232e-06	4.49432e-05
	HUERS-P2-int	LTR	ERV1	29.8342	0.771892	0.16409	4.70407	38.0833	19.625	2.55023e-06	5.19991e-05
	MLT1E2	LTR	ERVL-MaLR	751.952	0.276023	0.0591114	4.66954	841.333	657.125	3.0187e-06	5.9785e-05
	LTR50	LTR	ERVL	373.586	0.284939	0.0612463	4.65235	418.167	324	3.28177e-06	6.43441e-05
	LOR1a	LTR	ERV1	132	0.446695	0.0963291	4.63718	153.417	106.25	3.53203e-06	6.85187e-05
	MER11D	LTR	ERVK	89.0032	0.498971	0.107656	4.63487	105.583	69.625	3.57164e-06	6.89751e-05
	LTR9B	LTR	ERV1	207.601	0.490729	0.105964	4.63109	245.833	162.375	3.63744e-06	7.01763e-05
	PABL_A-int	LTR	ERV1	155.757	0.497663	0.108314	4.59463	184.75	122.375	4.33509e-06	8.16951e-05
	HUERS-P1-int	LTR	ERV1	696.786	0.483338	0.105265	4.59162	820.167	548.25	4.3982e-06	8.24902e-05
	MLT1I	LTR	ERVL-MaLR	1209.37	0.31008	0.0682877	4.54079	1365	1040.62	5.60434e-06	0.000100536
	MLT1E1A	LTR	ERVL-MaLR	456.713	0.248277	0.0551655	4.50059	507.167	403.375	6.77658e-06	0.000117517
	MER101-int	LTR	ERV1	410.31	0.423427	0.0946835	4.47202	474.583	337.125	7.74827e-06	0.000130915
	MER77	LTR	ERVL	529.059	0.409433	0.0919575	4.45241	609.333	433.25	8.49124e-06	0.000141136
	HERV3-int	LTR	ERV1	174.401	0.528415	0.118689	4.45212	208.917	134.5	8.50283e-06	0.000141158
	LTR79	LTR	ERVL	375.372	0.323473	0.0727006	4.44938	426.917	322.625	8.61176e-06	0.00014272
	MLT1H-int	LTR	ERVL-MaLR	88.1856	0.514898	0.116259	4.42889	104.167	68.375	9.47213e-06	0.000153107
	LTR16B2	LTR	ERVL	164.977	0.396806	0.0907532	4.37237	191.25	135.875	1.22906e-05	0.000188888
	LTR16E1	LTR	ERVL	308.198	0.346697	0.0794486	4.36379	350.333	261.75	1.27828e-05	0.000195084
	MER31B	LTR	ERV1	210.095	0.505182	0.116361	4.34152	248.417	164.125	1.41501e-05	0.000211977
	MER89-int	LTR	ERV1	53.2697	0.69956	0.162034	4.31738	66.3333	36.875	1.57894e-05	0.000233233
	LTR106_Mam	LTR	LTR	56.8487	0.575946	0.13341	4.31713	68.5833	42.5	1.58073e-05	0.000233374
	MLT1H2	LTR	ERVL-MaLR	655.325	0.302051	0.0702014	4.30264	738.417	565.75	1.68779e-05	0.000246018
	MLT1M	LTR	ERVL-MaLR	382.1	0.365448	0.0851233	4.29316	439.083	319.375	1.76145e-05	0.000255143
	MLT1E	LTR	ERVL-MaLR	143.32	0.362608	0.084835	4.27427	163.417	120.125	1.91762e-05	0.000274737
	LTR88c	LTR	Gypsy	211.684	0.94332	0.223937	4.21243	289.083	181.25	2.52636e-05	0.000344615
	LTR9D	LTR	ERV1	156.162	0.360059	0.0855313	4.20967	177.417	130.375	2.5574e-05	0.000347807
	MER74B	LTR	ERVL	545.659	0.345687	0.0821795	4.20649	623.917	463.375	2.59366e-05	0.000351871
	LTR16	LTR	ERVL	217.805	0.399881	0.0951555	4.2024	252.583	178	2.64099e-05	0.000357589
	MSTB-int	LTR	ERVL-MaLR	125.867	0.492119	0.117169	4.20009	148.583	99.25	2.66807e-05	0.000360549
	MLT2B1	LTR	ERVL	220.547	0.375531	0.0896499	4.18886	252.25	183.625	2.80356e-05	0.000375914
	HERV9-int	LTR	ERV1	145.704	0.892091	0.214168	4.16538	199.083	81	3.10832e-05	0.000409013
	THE1A-int	LTR	ERVL-MaLR	1372.11	0.355378	0.0854644	4.1582	1575.58	1158.62	3.20761e-05	0.000418703
	MLT1F1	LTR	ERVL-MaLR	810.369	0.315788	0.0762356	4.14226	918.917	694.5	3.43898e-05	0.00044304
	MamGypLTR3a	LTR	Gypsy	60.7527	0.440472	0.106586	4.13255	70.75	48.75	3.58759e-05	0.0004577
	MSTB1	LTR	ERVL-MaLR	806.687	0.410178	0.0996034	4.11811	931.75	657.75	3.81988e-05	0.000481109
	LTR89	LTR	ERVL	179.888	0.332243	0.0807883	4.11251	205.25	152.75	3.91386e-05	0.00049093
	LTR10A	LTR	ERV1	112.241	0.444146	0.108071	4.10978	131.917	91	3.96035e-05	0.000495861
	MER9a3	LTR	ERVK	220.182	0.355017	0.0866083	4.09912	251.833	186.5	4.14733e-05	0.000514836
	MLT1G-int	LTR	ERVL-MaLR	75.6922	0.796654	0.195407	4.0769	100.25	48.625	4.56394e-05	0.000557281
	MER52A	LTR	ERV1	267.373	0.467824	0.115236	4.0597	312.167	211.125	4.91357e-05	0.000592736
	MLT2A1	LTR	ERVL	303.03	0.343887	0.0851444	4.03886	345.333	255.25	5.37106e-05	0.000635868
	HERVE-int	LTR	ERV1	612.699	0.432077	0.107308	4.02652	706.917	492.375	5.66076e-05	0.000665314
	LTR48	LTR	ERV1	113.012	0.425118	0.106208	4.00269	131.167	91.625	6.2627e-05	0.000721531
	HERV9N-int	LTR	ERV1	69.2487	0.428338	0.10721	3.99532	80.5	55.875	6.46062e-05	0.000739183
	MLT1B-int	LTR	ERVL-MaLR	233.07	0.341546	0.0858103	3.98025	266.583	198.375	6.88428e-05	0.00077862
	MER34B	LTR	ERV1	99.5731	0.386785	0.09727	3.97641	114.5	82.25	6.99638e-05	0.000788071
	LTR14A	LTR	ERVK	43.732	0.546315	0.13767	3.96828	52.9167	33.25	7.23923e-05	0.000810794
	LTR104_Mam	LTR	Gypsy	189.236	0.371172	0.0946598	3.92111	217.583	156.75	8.81409e-05	0.000962577
	HERVK22-int	LTR	ERVK	99.3944	0.492158	0.12566	3.91657	117.917	77.625	8.98186e-05	0.000976265
	LTR12	LTR	ERV1	154.382	0.310453	0.0793333	3.91327	175.417	132.875	9.10549e-05	0.00098737
	MamRep605	LTR?	LTR	606.628	0.273908	0.0700865	3.90815	682.167	529.625	9.30073e-05	0.00100381
	MER67A	LTR	ERV1	124.155	0.464182	0.119665	3.87899	144.917	97.625	0.000104889	0.0011112
	THE1A	LTR	ERVL-MaLR	996.36	0.258656	0.0668145	3.87126	1112.75	876.25	0.000108273	0.00113831
	MSTB1-int	LTR	ERVL-MaLR	26.9737	0.650858	0.168442	3.86399	33.4167	19	0.000111549	0.00116521
	MER34C2	LTR	ERV1	171.105	0.311153	0.0809403	3.84422	192.583	146.75	0.000120935	0.00123996
	MamGypsy2-LTR	LTR	Gypsy	63.2746	0.439765	0.114688	3.83444	74	51	0.000125851	0.00127926
	LTR54B	LTR	ERV1	83.4201	0.375936	0.0980586	3.83379	96.25	69.625	0.000126183	0.00128075
	MER66-int	LTR	ERV1	124.23	0.378206	0.0987154	3.83127	142.083	102.5	0.000127482	0.0012916
	MLT2D	LTR	ERVL	374.845	0.330575	0.0867372	3.81123	423.917	317.125	0.000138278	0.00137869
	MER92B	LTR	ERV1	612.916	0.450496	0.118832	3.79104	711.5	491.25	0.000150018	0.00147865
	ERV3-16A3_I-int	LTR	ERVL	661.802	0.319123	0.0843127	3.785	747.583	565.375	0.000153711	0.00150538
	MLT1K	LTR	ERVL-MaLR	2721.87	0.304849	0.0806528	3.77977	3075.08	2348	0.000156976	0.00153192
	LTR64	LTR	ERV1	85.6654	0.38119	0.101056	3.77205	98.5	70.625	0.000161912	0.00156735
	MLT1C	LTR	ERVL-MaLR	3962.84	0.251547	0.0667247	3.76992	4388.33	3489.62	0.000163297	0.00157909
	MSTB	LTR	ERVL-MaLR	1982.91	0.301883	0.0801323	3.76731	2235.83	1700.25	0.000165019	0.00159227
	LTR43	LTR	ERV1	248.53	0.352441	0.0944555	3.7313	283.667	207	0.000190497	0.00178886
	HERV1_I-int	LTR	ERV1	31.0494	0.601869	0.161644	3.72343	38	22.375	0.000196535	0.00183557
	LTR86A1	LTR	ERVL	149.58	0.461241	0.123927	3.72188	178.083	119.875	0.000197743	0.00184435
	MER57A-int	LTR	ERV1	647.971	0.277427	0.0747068	3.71355	722.25	563.875	0.000204375	0.00189402
	MLT1O	LTR	ERVL-MaLR	772.947	0.267075	0.072231	3.69752	865.333	676.125	0.000217718	0.00199428
	MLT2C1	LTR	ERVL	465.014	0.395731	0.107473	3.68214	533.25	378.875	0.000231281	0.00209351
	ERVL47-int	LTR	ERVL	30.7234	0.581074	0.158211	3.67279	37.3333	22.625	0.000239915	0.00216033
	MER66C	LTR	ERV1	62.0515	0.523001	0.142406	3.67261	74.25	47.375	0.000240088	0.00216119
	LTR78B	LTR	ERV1	282.617	0.281578	0.0770555	3.65422	318.25	246.75	0.000257963	0.00229515
	HUERS-P3b-int	LTR	ERV1	314.095	0.363628	0.100098	3.63271	360.833	262.25	0.000280458	0.00245833
	LTR23-int	LTR	ERV1	14.529	0.744753	0.205674	3.62103	18.75	9.25	0.000293428	0.00254587
[truncated: 397 more rows]
